# Supplementary material
Source: PubMed Central journal article supplement (PMC8516040)
Supplement: aem.01108-21-s0001.pdf [file aem.01108-21-s0001.pdf]

**Table S1. DNA sequences of synthetic constructs used to generate integration plasmids**

| <b>Construct</b>                  | <b>Sequence</b>                                                                                                                                                                                                                                                                                                                                                                                                                                                                                                      |
|-----------------------------------|----------------------------------------------------------------------------------------------------------------------------------------------------------------------------------------------------------------------------------------------------------------------------------------------------------------------------------------------------------------------------------------------------------------------------------------------------------------------------------------------------------------------|
| <i>sufp_sodM</i> RBS_ <i>lacZ</i> | CATCAAATGCAGTCAGGAAAGCAATTAGGAATTCGCTAGCGGATCCC<br>CCGGGGTTCGACGATTGGAATAAAATCATAAATAGCATCATACCATAT<br>TACAAATGTCCTAGTGAAATGATAACATATTTTAAATTCATAAAATCCA<br>TTGAGAAATTATGTGCACCTTATTATCATTATATTTTTAAAGAGAGCG<br>GATTAGAGTTGTACTTTAGAGTTATTAATAAATAATAAAAAGGGTTTAA<br>GTTGTTTATATTAAGGTATAAGTAAGTTATAATTAAGTGAACGCATTAT<br>TACAAAGTCTTTTTGACTACAAATTAATAAATTATTATAAACTAGTTAAGA<br>AAACTTTATATTTTACGGAGGGGAATATAAATGGTACCACGCGTTTAGG<br>AGGATGATTATTTATGTCTAGAATGACAATGATTACAGATTCATTAGC<br>AGTTGTTTTACAACGTCGTGATTGGG |
| <i>sufp_sarA</i> RBS_ <i>lacZ</i> | CATCAAATGCAGTCAGGAAAGCAATTAGGAATTCGCTAGCGGATCC<br>CCCGGGTTCGACGATTGGAATAAAATCATAAATAGCATCATACCATA<br>TTACAAATGTCCTAGTGAAATGATAACATATTTTAAATTCATAAAATCC<br>ATTGAGAAATTATGTGCACCTTATTATCATTATATTTTTAAAGAGAGC<br>GGATTAGAGTTGTACTTTAGAGTTATTAATAAATAATAAAAAGGGTTTA<br>AGTTGTTTATATTAAGGTATAAGTAAGTTATAATTAAGTGAACGCATT<br>ATTACAAAGTCTTTTTGACTACAAATTAATAAATTATTATAAACTAGTTAA<br>GAAAACTTTATATTTTACGGAGGGGAATATAAATGGTACCACGCGTTA<br>GGGAGGTTTTAAACATGTCTAGAATGACAATGATTACAGATTCATTA<br>GCAGTTGTTTTACAACGTCGTGATTGGGA   |
| <i>sufp_hld</i> RBS_ <i>lacZ</i>  | CATCAAATGCAGTCAGGAAAGCAATTAGGAATTCGCTAGCGGATCC<br>CCCGGGTTCGACGATTGGAATAAAATCATAAATAGCATCATACCATA<br>TTACAAATGTCCTAGTGAAATGATAACATATTTTAAATTCATAAAATCC<br>ATTGAGAAATTATGTGCACCTTATTATCATTATATTTTTAAAGAGAGC<br>GGATTAGAGTTGTACTTTAGAGTTATTAATAAATAATAAAAAGGGTTTA<br>AGTTGTTTATATTAAGGTATAAGTAAGTTATAATTAAGTGAACGCATT<br>ATTACAAAGTCTTTTTGACTACAAATTAATAAATTATTATAAACTAGTTAA<br>GAAAACTTTATATTTTACGGAGGGGAATATAAATGGTACCACGCGTAA<br>GGAAGGAGTATTTCAATGTCTAGAATGACAATGATTACAGATTCAT<br>TAGCAGTTGTTTTACAACGTCGTGATTGGG   |
| <i>sufp_TIR</i> RBS_ <i>lacZ</i>  | CATCAAATGCAGTCAGGAAAGCAATTAGGAATTCGCTAGCGGATCC<br>CCCGGGTTCGACGATTGGAATAAAATCATAAATAGCATCATACCATA<br>TTACAAATGTCCTAGTGAAATGATAACATATTTTAAATTCATAAAATCC<br>ATTGAGAAATTATGTGCACCTTATTATCATTATATTTTTAAAGAGAGC<br>GGATTAGAGTTGTACTTTAGAGTTATTAATAAATAATAAAAAGGGTTTA<br>AGTTGTTTATATTAAGGTATAAGTAAGTTATAATTAAGTGAACGCATT<br>ATTACAAAGTCTTTTTGACTACAAATTAATAAATTATTATAAACTAGTTAA<br>GAAAACTTTATATTTTACGGAGGGGAATATAAATGGTACCACGCGTTA<br>TAAGGAGGAAAAACATATGTCTAGAATGACAATGATTACAGATTCATT<br>AGCAGTTGTTTTACAACGTCGTGATTGGG  |
| <i>P1sae_TIR</i> RBS_ <i>lacZ</i> | CATCAAATGCAGTCAGGAAAGCAATTAGGAATTCGCTAGCGGATCC<br>CCCGGGTTCGACATACCAAAACTATTAACACTTCTGATATTCTTAG<br>TTCAAATATCAGAAGTGTTTTATAGTGTTATCTAGTTCAGATAAATAT<br>TTCCTTACTTAAAAAACGCCCTCCTCTTATTTTTGACCCCTATTTATTT<br>AAATCAGACAATTATTTTCATTTTCAAATTATTCTTTCTTCAATATTAGT<br>TAAGCGATATTTAAACGAAGTTAAGAATTAGTTAATGGCATATTATTT<br>GCCTTCATTTTAACTTAACTTATCAAATTGGTACCACGCGTTTATAA<br>GGAGGAAAAACATATGTCTAGAATGACAATGATTACAGATTCATTAG<br>CAGTTGTTTTACAACGTCGTGATTGGG                                                             |
| <i>P1sae_hld</i> RBS_ <i>lacZ</i> | CATCAAATGCAGTCAGGAAAGCAATTAGGAATTCGCTAGCGGATCC<br>CCCGGGTTCGACATACCAAAACTATTAACACTTCTGATATTCTTAG<br>TTCAAATATCAGAAGTGTTTTATAGTGTTATCTAGTTCAGATAAATAT                                                                                                                                                                                                                                                                                                                                                                 |

---

|                                    |                                                                                                                                                                                                                                                                                                                                                                                                                                                                 |
|------------------------------------|-----------------------------------------------------------------------------------------------------------------------------------------------------------------------------------------------------------------------------------------------------------------------------------------------------------------------------------------------------------------------------------------------------------------------------------------------------------------|
|                                    | TTCCTTACTTAAAAAACGCCCTCCTCTTATTTTTGACCCCTATTTATTT<br>AAATCAGACAATTATTTTCATTTTCAAATTATTCTTTCTTCAATATTAGT<br>TAAGCGATATTTAAACGAAGTTAAGAATTAGTTAATGGCATATTATTT<br>GCCTTCATTTTAACTTAACTTATCAAATTGGTACCACGCGTAAGGAA<br>GGAGTGATTTCAATGTCTAGAATGACAATGATTACAGATTCATTAGCA<br>GTTGTTTTACAACGTCGTGATTGGG                                                                                                                                                                 |
| <i>P1sae_sarA</i> RBS_ <i>lacZ</i> | CATCAAATGCAGTCAGGAAAGCAATTAGGAATTCGCTAGCGGATCC<br>CCCGGGTTCGACATACCAAACCTATTAACACTTCTGATATTCTTAG<br>TTCAAATATCAGAAGTGTATATAGTGTTATCTAGTTCAGATAAATAT<br>TTCCTTACTTAAAAAACGCCCTCCTCTTATTTTTGACCCCTATTTATTT<br>AAATCAGACAATTATTTTCATTTTCAAATTATTCTTTCTTCAATATTAGT<br>TAAGCGATATTTAAACGAAGTTAAGAATTAGTTAATGGCATATTATTT<br>GCCTTCATTTTAACTTAACTTATCAAATTGGTACCACGCGTTAGGGA<br>GGTTTTAAACATGTCTAGAATGACAATGATTACAGATTCATTAGCAGT<br>TGTTTTACAACGTCGTGATTGGGA           |
| <i>P1sae_sodM</i> RBS_ <i>lacZ</i> | CATCAAATGCAGTCAGGAAAGCAATTAGGAATTCGCTAGCGGATCC<br>CCCGGGTTCGACATACCAAACCTATTAACACTTCTGATATTCTTAG<br>TTCAAATATCAGAAGTGTATATAGTGTTATCTAGTTCAGATAAATAT<br>TTCCTTACTTAAAAAACGCCCTCCTCTTATTTTTGACCCCTATTTATTT<br>AAATCAGACAATTATTTTCATTTTCAAATTATTCTTTCTTCAATATTAGT<br>TAAGCGATATTTAAACGAAGTTAAGAATTAGTTAATGGCATATTATTT<br>GCCTTCATTTTAACTTAACTTATCAAATTGGTACCACGCGTTTAGGA<br>GGATGATTATTTATGTCTAGAATGACAATGATTACAGATTCATTAGCA<br>GTTGTTTTACAACGTCGTGATTGGG          |
| <i>EcFbFP</i>                      | ATGGCATCATTCCAGTCTTTCGGTATACCAGGCCAATTAGAGGTTAT<br>CAAGAAGGCGTTAGATCATGTACGTGTTGGAGTTGTAATTACTGATC<br>CTGCATTAGAGGACAACCCTATCGTGTATGTTAATCAGGGATTTGTG<br>CAGATGACTGGATACGAGACGGAAGAGATCTTAGGCAAGAACGCTC<br>GTTTCTTGCAAGGAAAACACACAGACCCGGCAGAAGTCGATAATATA<br>AGAACGGCTTTACAGAATAAGGAGCCGGTTACGGTTCAAATCCAGA<br>ACTATAAAAAGGATGGAACCTATGTTTTGGAATGAGTTGAACATAGAC<br>CCGATGGAAATAGAGGACAAAACGTACTTTGTAGGCATCCAAAACGA<br>TATTACAAAACAAAAGGAGTACGAGAAGTTGTTGGAGTAG |

---

**Table S2. DNA primers used in this study**

| Primer Name                    | Sequence                                                                            |
|--------------------------------|-------------------------------------------------------------------------------------|
| Down <i>kan</i> crtMrev        | ACCAATTACTGCAATCTTCATTATTCAACCACTTTAGACATCTAAATCTAGGTACTAAAACAATTCATCCAGTA          |
| Up <i>kan</i> crtMfor          | AATCAAGGTAATGGCATTTCATATAGGAGGACTAGTTTGAGGTGATAGGTAAGATTATACCGAGGTATGAA             |
| <i>kan</i> RupcrtMrev          | TTCATACCTCGGTATAATCTTACCTATCACCTCAAAGTCTCCTATATTGAAATGCCATTACCTTGATT                |
| pJB38upcrtMfor                 | TTCGTCTTCAAGAATTCGAGCTCGGTACCCGGTGCGACTGTAGTAGATGTTGTTGA                            |
| <i>k</i> andowncrtMfor         | TFACTGGATGAATTGTTTTAGTACCTAGATTTAGATGTCTAAAGTGGTTGAATAATGAAGATTGCAGTAATTGGT         |
| pJB38downcrtMrev               | CCTGCAGGTCGACTCTAGAGGATCCCCCTGAACAAGAGTAATCTAAGTCTGCAATTTTATGTGG                    |
| pJB38YCC                       | AATAGGCGTATCACGAGGCCCTTTCGTCTTCAAGAATTGGTGGCACTTTTCGGGGAAA                          |
| YCC <i>geh</i> for             | GGGTAATATAGCGTAACTATAACGGTCCCTAATGTGCAAGAAACATAGTATGCCCACTAA                        |
| YCC <i>geh</i> rev             | TTAGTGGGCATACTATGTTTCTTGCACATTAGGACCGTTATAGTTACGCTATATTACCC                         |
| <i>geh</i> P1rev               | TCAGAAGTGTTTAAATAGTTTTGGTATGTGACCCCGGGGGATCCGCTAGCGAATTCCTAATGCTTTCTGACTGCATTTGATG  |
| <i>geh</i> P1for               | CATCAAATGCAGTCAGGAAAGCAATTAGGAATTCGCTAGCGGATCCCCGGGGTTCGACATACCAAACCTATTAACACTTCTGA |
| <i>lacZ</i> <i>geh</i> for     | TGTATAACGAAAGTATAATGTTTATATAACGGTCCAATCAACCATTTGTTAATGTTACG                         |
| <i>lacZ</i> <i>geh</i> rev     | CGTAACATTAACAAATGGTTGATTGGACCGTTATATAAACATTATACTTTTCGTTATACA                        |
| <i>gehp</i> JB38               | GTGAAATCAGAGCTTGCATGCCTGCAGGTCGCGCGTGAATAAAAACGAGCATGATTTTG                         |
| P1TIR <i>lacZ</i> rev          | CTGTAATCATTGTCATTCTAGACATATGTTTTCTCCTTATAAACCGGTAATTTGATAAGTTAAGTTTAAAATGAAGGC      |
| P1TIR <i>lacZ</i> for          | GCCTTCATTTTAAACTTAACTTATCAAATTACGCGTTTATAAGGAGGAAAAACATATGTCTAGATGACAATGATTACAG     |
| P1 <i>sodM</i> <i>lacZ</i> for | GCCTTCATTTTAAACTTAACTTATCAAATTACGCGTTTAGGAGGATGATTATTTATGTCTAGAAATGACAATGATTACAG    |
| P1 <i>sodM</i> <i>lacZ</i> rev | CTGTAATCATTGTCATTCTAGACATAAATAATCATCCTCCTAAACGCGTAATTTGATAAGTTAAGTTTAAAATGAAGGC     |
| P1 <i>sarA</i> <i>lacZ</i> for | GCCTTCATTTTAAACTTAACTTATCAAATTACGCGTTAGGGAGGTTTTAACATGTCTAGAATGACAATGATTACAG        |
| P1 <i>sarA</i> <i>lacZ</i> rev | CTGTAATCATTGTCATTCTAGACATGTTTAAAACCTCCCTAACGCGTAATTTGATAAGTTAAGTTTAAAATGAAGGC       |
| P1 <i>hld</i> <i>lacZ</i> for  | GCCTTCATTTTAAACTTAACTTATCAAATTACGCGTAAGGAAGGAGTGATTTCAATGTCTAGATGACAATGATTACAG      |
| P1 <i>hld</i> <i>lacZ</i> rev  | CTGTAATCATTGTCATTCTAGACATTGAAATCACTCCTTCTTACGCGTAATTTGATAAGTTAAGTTTAAAATGAAGGC      |
| Tn Buster                      | GCTTTTTCTAAATGTTTTTTAAGTAAATCAAGTACC                                                |
| Martn-ermR                     | AAACTGATTTTTAGTAAACAGTTGACGATATTC                                                   |
| <i>srrApr</i> (NSfw)           | ATAGCTAGCGTCGACGTG ATGCGTCATTTAGCAGAA                                               |
| <i>srrApr</i> (KMrv)           | TATACGCGTGGTACCACAGGTCATACCTCCCACACATG                                              |
| <i>sufpr</i> (nhelfw)          | ATGAATTCGCTAGCGATTGGAATAAAATCATAAATAGCATCATACC                                      |
| <i>sufpr</i> (kpnIrv)          | ATGGTACCTTTATATTCCCTCCGTAAAATATAAAGTTTTTC                                           |
| <i>cap5a</i> (Nhelfw)          | ATAGCTAGCGATTATAAGCAATAATCTATCTG                                                    |
| <i>cap5a</i> (KpnIrv)          | TATGGTACCCCTTAAAAATTTTCATTAATAATTGG                                                 |

|                           |                                                                                             |
|---------------------------|---------------------------------------------------------------------------------------------|
| gehupsdna5                | GGGATAACAGGGTAATATAGCGTAACTA                                                                |
| gehupsdna3                | CAGAAGTGTTTAAATAGTTTTGGTATGTCCG                                                             |
| rbslacZsDNA5              | CATCAAATGCAGTCAGGAAAGCAATTAGGA                                                              |
| rbslacZsDNA3              | CCCAATCACGACGTTGTA AAAACA ACTGC                                                             |
| lacZfor2                  | ATGTCTAGAATGACAATGATTACAGATTC                                                               |
| gehpJB38 pstI             | CAAATCATGCTCGTTTTTATTACGCGCTGCAGGCATGCAAGCTCTGATTTCACTTTTTGC                                |
| EcFbFP <sub>geh</sub> for | ACAAAAGGAGTACGAGAAGTTGTTGGAGTAGGTCCAATCAACCATTTGTTAATGTTACG                                 |
| P1TIR <u>EcFbFP</u> for   | GCCTTCATTTTAACTTAACTTATCAAATTACGCGTTTATAAGGAGGAAAAACATATGGCATC<br>ATTCCAGTCTTTCGGTA         |
| EcFbFP <sub>geh</sub> rev | CGTAACATTAACAAATGGTTGATTGGACCTACTCCAACAACCTTCTCGTACTCCTTTTGT                                |
| pCM28 ycc for             | CCTAAAAACCTACAGAAGCTTGCATGCCTGCAGGGTGGCACTTTTCGGGGAAA                                       |
| YCC P1 rev                | TCAGAAGTGTTTAAATAGTTTTGGTATGTGACCCCGGGGGATCCGCTAGCGAATTCTTAGGA<br>CCGTTATAGTTACGCTATATTACCC |
| Ycc P1 for                | GGGTAATATAGCGTAACTATAACGGTCTAAGAATTCGCTAGCGGATCCCGGGGGTTCGAC<br>ATACCAAACTATTAACACTTCTGA    |
| EcFbFP pCM28 3            | CACACAGGAAACAGCTATGACCATGATTACGAGCGGCCCTACTCCAACAACCTTCTCGTA<br>CTCC                        |
| YCC GEH rev               | GATCAGGCTTTACTAGCAAAGCGTCAGCGGCACATTAGGACCGTTATAGTTACGCTAT                                  |
| YCC GEH FOR               | ATAGCGTAACTATAACGGTCCTAATGTGCCGCTGACGCTTTTGCTAGTAAAGCCTGATC                                 |
| GEH P1 rev                | GTCGACCCCGGGGGATCCGCTAGCGAATTCACTATACAATTATAGTAAGTTTTTCAGATT                                |
| GEH P1 for                | GAATTCGCTAGCGGATCCCGGGGTTCGACATACCAAACTATTAACACTTCTGATAT                                    |
| P1 TIR RBS geh rev        | TGTTTTTCTCCTTATAAACGCGTGGTACCAATTTGATAAGTTAAGTTTAAAATGAAGG                                  |
| P1 TIR RBS geh for        | GTACCACGCGTTTATAAGGAGGAAAAACATATGTTAAGAGGACAAGAAGAAAGAAAGTA                                 |
| geh pJB rev               | TGAAATCAGAGCTTGCATGCCTGCAGGTGCGCCAATAATTTGGATATAAAGCAGGTGCA                                 |
| P1 sod RBS geh rev        | AAATAATCATCCTCCTAACGCGTGGTACCAATTTGATAAGTTAAGTTTAAAATGAAGGC                                 |
| P1 sod RBS geh for        | GGTACCACGCGTTAGGAGGATGATTATTTATGTTAAGAGGACAAGAAGAAAGAAAGTAT                                 |
| YCC HLA REV               | TGAAAATGAAAATGAGGCTGTGTGTAAGCACATTAGGACCGTTATAGTTACGCT                                      |
| YCC HLA for               | AGCGTAACTATAACGGTCCTAATGTGCTTACACACAGCCTCATTTTTTCATTTTCA                                    |
| HLA P1 REV                | GTCGACCCCGGGGGATCCGCTAGCGAATTTCTGTGCATGAAGTATAAGTCACCTTCATAT                                |
| P1 RBS HLA REV            | ATGTTTTTCTCCTTATAAACGCGTGGTACCAATTTGATAAGTTAAGTTTAAAATGAAG                                  |
| HLA P1 FOR                | GAATTCGCTAGCGGATCCCGGGGTTCGACATACCAAACTATTAACACTTCTGATAT                                    |
| P1 RBS HLA FOR            | GTACCACGCGTTTATAAGGAGGAAAAACATATGAAAACACGTATAGTCAGCTCAGTAAC                                 |
| HLA PJB REV               | GTGAAATCAGAGCTTGCATGCCTGCAGGTGCGAGTCTGGTGAAAACCCTGAAGATAATAG                                |
| P1 SODM RBS HLA REV       | AAATAATCATCCTCCTAACGCGTGGTACCAATTTGATAAGTTAAGTTTAAAATGAAGGC                                 |
| P1 sodM RBS Hla for       | GGTACCACGCGTTAGGAGGATGATTATTTATGAAAACACGTATAGTCAGCTCAGTAACA                                 |

**Table S3. Primers and templates utilized to create integration vector cloning fragments.**

| Plasmid                                     | Primer 1                                                                                              | Primer 2                                                                                                     | Template                                                                                                     |
|---------------------------------------------|-------------------------------------------------------------------------------------------------------|--------------------------------------------------------------------------------------------------------------|--------------------------------------------------------------------------------------------------------------|
| pJB38_ <i>P1sae_TIR</i> RBS_ <i>lacZ</i>    | pJB38YCC<br>YCC <i>geh</i> for<br><i>geh</i> P1 for<br>P1 <i>TIR lacZ</i> for<br><i>lacZ geh</i> for  | YCC <i>geh</i> rev<br><i>geh</i> P1 rev<br>P1 <i>TIR lacZ</i> rev<br><i>lacZ geh</i> rev<br><i>gehpJB38</i>  | pJB38_ $\Delta$ <i>copBL</i><br>JMB1100<br><i>P1_TIR</i> RBS_ <i>lacZ</i><br>pJB185<br>JMB1100               |
| pJB38_ <i>P1sae_sodM</i> RBS_ <i>lacZ</i>   | pJB38YCC<br>YCC <i>geh</i> for<br><i>geh</i> P1 for<br>P1 <i>sodM lacZ</i> for<br><i>lacZ geh</i> for | YCC <i>geh</i> rev<br><i>geh</i> P1 for<br>P1 <i>sodM lacZ</i> rev<br><i>lacZ geh</i> rev<br><i>gehpJB38</i> | pJB38_ $\Delta$ <i>copBL</i><br>JMB1100<br><i>P1_sodM</i> RBS_ <i>lacZ</i><br>pJB185<br>JMB1100              |
| pJB38_ <i>P1sae_sarA</i> RBS_ <i>lacZ</i>   | pJB38YCC<br>YCC <i>geh</i> for<br><i>geh</i> P1 for<br>P1 <i>sarA lacZ</i> for<br><i>lacZ geh</i> for | YCC <i>geh</i> rev<br><i>geh</i> P1 for<br>P1 <i>sarA lacZ</i> rev<br><i>lacZ geh</i> rev<br><i>gehpJB38</i> | pJB38_ $\Delta$ <i>copBL</i><br>JMB1100<br><i>P1_sarA</i> RBS_ <i>lacZ</i><br>pJB185<br>JMB1100              |
| pJB38_ <i>P1sae_hld</i> RBS_ <i>lacZ</i>    | pJB38YCC<br>YCC <i>geh</i> for<br><i>geh</i> P1 for<br>P1 <i>hld lacZ</i> for<br><i>lacZ geh</i> for  | YCC <i>geh</i> rev<br><i>geh</i> P1 for<br>P1 <i>hld lacZ</i> rev<br><i>lacZ geh</i> rev<br><i>gehpJB38</i>  | pJB38_ $\Delta$ <i>copBL</i><br>JMB1100<br><i>P1_hld</i> RBS_ <i>lacZ</i><br>pJB185<br>JMB1100               |
| pJB38_ <i>sufC_TIR</i> RBS_ <i>lacZ</i>     | pJB38YCC<br><i>gehupsdna5</i><br><i>rbslacZsDNA5</i><br><i>lacZfor2</i><br><i>lacZ geh</i> for        | YCC <i>geh</i> rev<br><i>gehupsdna3</i><br><i>rbslacZsDNA3</i><br><i>lacZ geh</i> rev<br><i>gehpJB38</i>     | pJB38_ $\Delta$ <i>copBL</i><br><i>geh</i><br><i>suf_TIR</i> RBS_ <i>lacZ</i><br>pJB185<br>JMB1100           |
| pJB38_ <i>sufC_sodM</i> RBS_ <i>lacZ</i>    | pJB38YCC<br><i>gehupsdna5</i><br><i>rbslacZsDNA5</i><br><i>lacZfor2</i><br><i>lacZ geh</i> for        | YCC <i>geh</i> rev<br><i>gehupsdna3</i><br><i>rbslacZsDNA3</i><br><i>lacZ geh</i> rev<br><i>gehpJB38</i>     | pJB38_ $\Delta$ <i>copBL</i><br>JMB1100<br><i>suf_sodM</i> RBS_ <i>lacZ</i><br>pJB185<br>JMB1100             |
| pJB38_ <i>sufC_sarA</i> RBS_ <i>lacZ</i>    | pJB38YCC<br><i>gehupsdna5</i><br><i>rbslacZsDNA5</i><br><i>lacZfor2</i><br><i>lacZ geh</i> for        | YCC <i>geh</i> rev<br><i>gehupsdna3</i><br><i>rbslacZsDNA3</i><br><i>lacZ geh</i> rev<br><i>gehpJB38</i>     | pJB38_ $\Delta$ <i>copBL</i><br>JMB1100<br><i>suf_sarA</i> RBS_ <i>lacZ</i><br>pJB185<br>JMB1100             |
| pJB38_ <i>sufC_hld</i> RBS_ <i>lacZ</i>     | pJB38YCC<br><i>gehupsdna5</i><br><i>rbslacZsDNA5</i><br><i>lacZfor2</i><br><i>lacZ geh</i> for        | YCC <i>geh</i> rev<br><i>gehupsdna3</i><br><i>rbslacZsDNA3</i><br><i>lacZ geh</i> rev<br><i>gehpJB38</i>     | pJB38_ $\Delta$ <i>copBL</i><br>JMB1100<br><i>suf_hld</i> RBS_ <i>lacZ</i><br>pJB185<br>JMB1100              |
| pJB38_ <i>P1sae_sarA</i> RBS_ <i>EcFbFP</i> | <i>EcFbFPgeh</i> for<br>P1 <i>TIR EcFbFP</i> for                                                      | <i>gehpJB38</i> pstI<br><i>EcFbFPgeh</i> rev                                                                 | JMB1100<br><i>EcFbFP</i>                                                                                     |
| pCM28_ <i>P1sae_sarA</i> RBS_ <i>EcFbFP</i> | pCM28 <i>ycc</i> for<br>Ycc P1 for                                                                    | YCC P1 rev<br><i>EcFbFP</i> pCM28 3                                                                          | pJB38_ <i>P1sae_sarA</i> RBS_ <i>EcFbFP</i><br>pJB38_ <i>P1sae_sarA</i> RBS_ <i>EcFbFP</i>                   |
| pJB38_ <i>sodM</i> RBS_ <i>hla</i>          | pJB38YCC<br>YCC HLA for<br>P1 SODM RBS HLA REV<br>P1 <i>sodM</i> RBS Hla for                          | YCC HLA REV<br>HLA P1 REV<br>HLA P1 FOR<br>HLA PJB REV                                                       | pJB38_ <i>P1sae_sodM</i> RBS_ <i>lacZ</i><br>JMB1100<br>pJB38_ <i>P1sae_sodM</i> RBS_ <i>lacZ</i><br>JMB1100 |
| pJB38_ <i>TIR</i> RBS_ <i>hla</i>           | pJB38YCC<br>YCC HLA for<br>P1 RBS HLA REV<br>P1 RBS HLA FOR                                           | YCC HLA REV<br>HLA P1 REV<br>HLA P1 FOR<br>HLA PJB REV                                                       | pJB38_ <i>P1sae_TIR</i> RBS_ <i>lacZ</i><br>JMB1100<br>pJB38_ <i>P1sae_TIR</i> RBS_ <i>lacZ</i><br>JMB1100   |
| pJB38_ <i>sodM</i> RBS_ <i>geh</i>          | pJB38YCC<br>YCC GEH FOR<br>GEH P1 for<br><i>geh</i> pJB rev                                           | YCC GEH rev<br>GEH P1 rev<br>P1 <i>sod</i> RBS <i>geh</i> rev<br>P1 <i>sod</i> RBS <i>geh</i> for            | pJB38_ <i>P1sae_sodM</i> RBS_ <i>lacZ</i><br>JMB1100<br>pJB38_ <i>P1sae_sodM</i> RBS_ <i>lacZ</i><br>JMB1100 |
| pJB38_ <i>TIR</i> RBS_ <i>geh</i>           | pJB38YCC<br>YCC GEH FOR<br>GEH P1 for<br>P1 <i>TIR</i> RBS <i>geh</i> for                             | YCC GEH rev<br>GEH P1 rev<br>P1 <i>TIR</i> RBS <i>geh</i> rev<br><i>geh</i> pJB rev                          | pJB38_ <i>P1sae_TIR</i> RBS_ <i>lacZ</i><br>JMB1100<br>pJB38_ <i>P1sae_TIR</i> RBS_ <i>lacZ</i><br>JMB1100   |
| pJB38_ $\Delta$ <i>crtM::kanR</i>           | YCC_ <i>crtM_for</i><br>up <i>kanR_crtM_for</i><br><i>kanR_down_crtM_for</i>                          | <i>kanR_up_crtM_rev</i><br>down_ <i>kanR_crtM_rev</i><br>pJB38_ <i>crtM_rev</i>                              | JMB1100<br>JMB2122<br>JMB1100                                                                                |

**Table S4.** Primers and vector backbone used to create plasmids using restriction enzyme-based cloning.

| Plasmid name                              | Vector backbone used                      | Primers used for amplifying insert DNA       | Restriction enzymes used for cloning |
|-------------------------------------------|-------------------------------------------|----------------------------------------------|--------------------------------------|
| pJB38_ <i>srrAp_hld</i> RBS_ <i>lacZ</i>  | pJB38_ <i>P1sae_hld</i> RBS_ <i>lacZ</i>  | <i>srrApr(NSfw)</i><br><i>srrApr(KMrv)</i>   | KpnI and Sall                        |
| pJB38_ <i>srrAp_sarA</i> RBS_ <i>lacZ</i> | pJB38_ <i>P1sae_sarA</i> RBS_ <i>lacZ</i> | <i>srrApr(NSfw)</i><br><i>srrApr(KMrv)</i>   | KpnI and Sall                        |
| pJB38_ <i>srrAp_sodM</i> RBS_ <i>lacZ</i> | pJB38_ <i>P1sae_sod</i> RBS_ <i>lacZ</i>  | <i>srrApr(NSfw)</i><br><i>srrApr(KMrv)</i>   | KpnI and Sall                        |
| pJB38_ <i>srrAp_TIR</i> RBS_ <i>lacZ</i>  | pJB38_ <i>P1sae_TIR</i> RBS_ <i>lacZ</i>  | <i>srrApr(NSfw)</i><br><i>srrApr(KMrv)</i>   | KpnI and Sall                        |
| pJB38_ <i>cap5a_hld</i> RBS_ <i>lacZ</i>  | pJB38_ <i>P1sae_hld</i> RBS_ <i>lacZ</i>  | <i>cap5a(Nhelfw)</i><br><i>cap5a(KpnIrv)</i> | NheI and KpnI                        |
| pJB38_ <i>cap5a_sodM</i> RBS_ <i>lacZ</i> | pJB38_ <i>P1sae_sarA</i> RBS_ <i>lacZ</i> | <i>cap5a(Nhelfw)</i><br><i>cap5a(KpnIrv)</i> | NheI and KpnI                        |
| pJB38_ <i>cap5a_sarA</i> RBS_ <i>lacZ</i> | pJB38_ <i>P1sae_sarA</i> RBS_ <i>lacZ</i> | <i>cap5a(Nhelfw)</i><br><i>cap5a(KpnIrv)</i> | NheI and KpnI                        |
| pJB38_ <i>cap5a_TIR</i> RBS_ <i>lacZ</i>  | pJB38_ <i>P1sae_TIR</i> RBS_ <i>lacZ</i>  | <i>cap5a(Nhelfw)</i><br><i>cap5a(KpnIrv)</i> | NheI and KpnI                        |
| pJB38_ <i>suf_sodM</i> RBS_ <i>lacZ</i>   | pJB38_ <i>P1sae_sod</i> RBS_ <i>lacZ</i>  | <i>sufpr(nhelfw)</i><br><i>sufpr(kpnIrv)</i> | NheI and KpnI                        |
| pJB38_ <i>sufC_hld</i> RBS_ <i>lacZ</i>   | pJB38_ <i>P1sae_hld</i> RBS_ <i>lacZ</i>  | <i>sufpr(nhelfw)</i><br><i>sufpr(kpnIrv)</i> | NheI and KpnI                        |
| pJB38_ <i>sufC_TIR</i> RBS_ <i>lacZ</i>   | pJB38_ <i>P1sae_TIR</i> RBS_ <i>lacZ</i>  | <i>sufpr(nhelfw)</i><br><i>sufpr(kpnIrv)</i> | NheI and KpnI                        |
| pJB38_ <i>sufC_sarA</i> RBS_ <i>lacZ</i>  | pJB38_ <i>P1sae_sarA</i> RBS_ <i>lacZ</i> | <i>sufpr(nhelfw)</i><br><i>sufpr(kpnIrv)</i> | NheI and KpnI                        |

\*JMB1100 was used as a template for all PCR reactions

**Table S5. DNA sequences of synthetic constructs used to generate integration plasmids**

**pJB38\_P1sae\_TIR RBS\_lacZ**

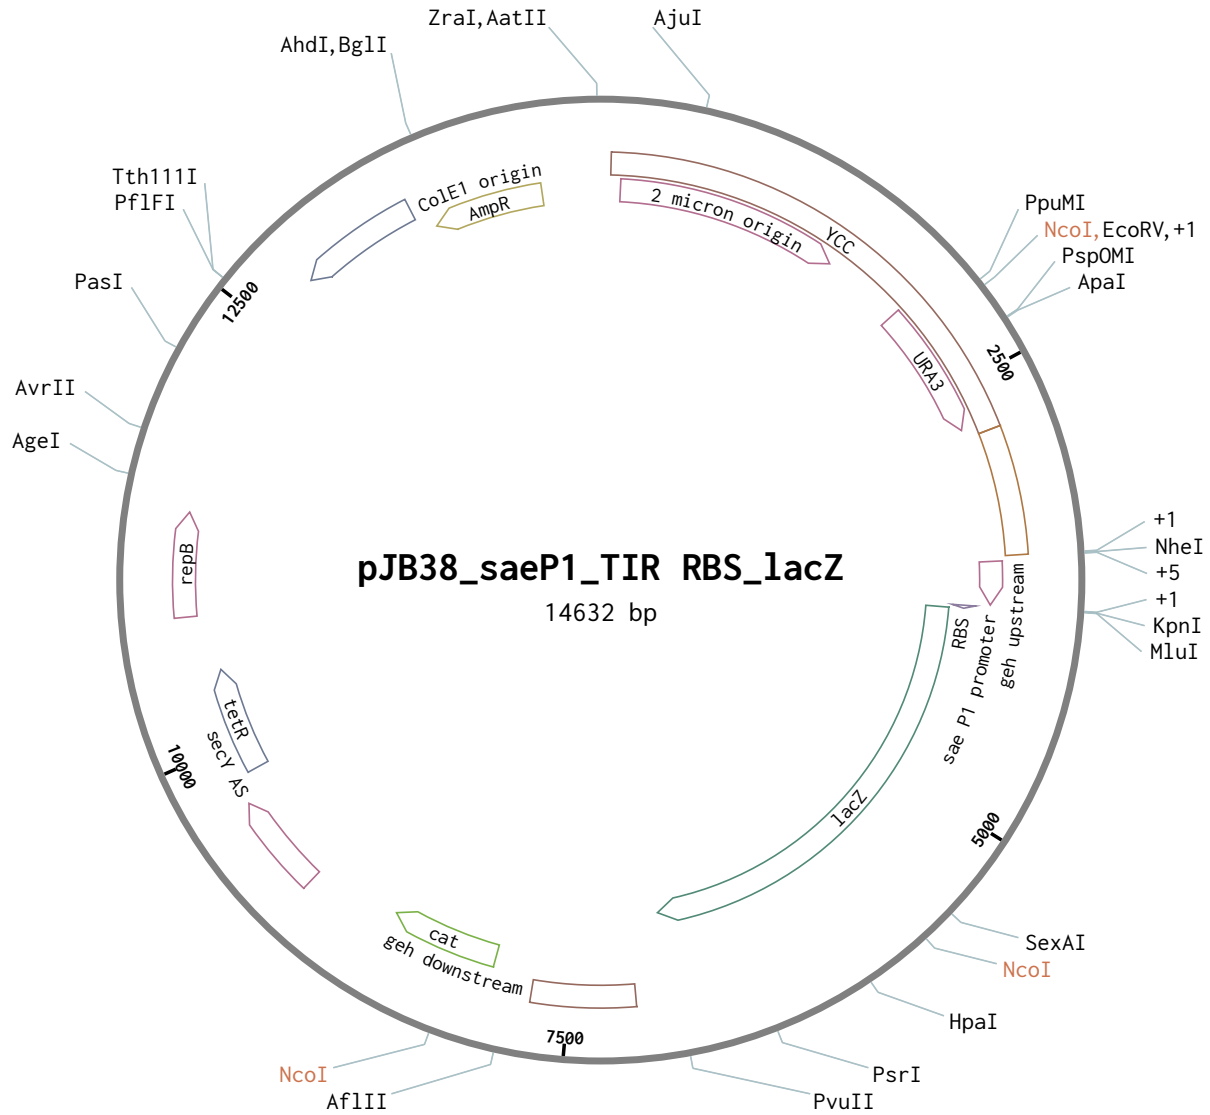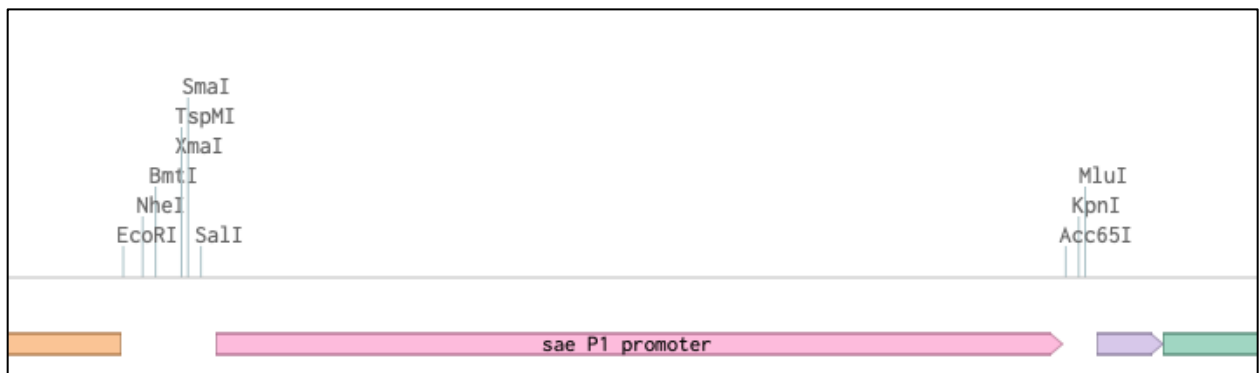

TCATGACATTAACCTATAAAAAATAGGCGTATCACGAGGCCCTTTTCGTCTTCAAGAATTGGTGCCACTT  
TTCGGGGAAAAGTTACGCTAGGGATAACAGGGTAATATAGCACCTGAACGAAGCATCTGTGCTTCAT  
TTTGTAGAACAAAAATGCAACGCGAGAGCGCTAATTTTTCAAACAAAGAATCTGAGCTGCATTTTTAC  
AGAACAGAAATGCAACGCGAAAGCGCTATTTTACCAACGAAGAATCTGTGCTTCATTTTTGTAAAACA  
AAAATGCAACGCGAGAGCGCTAATTTTTCAAACAAAGAATCTGAGCTGCATTTTTACAGAACAGAAAT  
GCAACGCGAGAGCGCTAATTTTACCAACAAAGAATCTATACTTCTTTTTTTGTCTACAAAAATGCATCCC  
GAGAGCGCTATTTTTCTAACAAAGCATCTTAGATTACTTTTTTTCTCCTTTGTGCGCTCTATAATGCAG  
TCTCTTGATAACTTTTTGCACTGTAGGTCCGTTAAGGTTAGAAGAAGGCTACTTTGGTGTCTATTTTTCT  
CTTCATAAAAAAAGCCTGACTCCACTTCCCGCGTTTACTGATTACTAGCGAAGCTGCGGGTGCATTT  
TTTTCAAGATAAAGGCATCCCCGATTATATTCTATAACCGATGTGGATTGCGCATACTTTGTGAACAGAA  
AGTGATAGCGTTGATGATTCTTCATTGGTCAGAAAATTATGAACGGTTTCTTCTATTTTTGTCTCTATAT  
ACTACGTATAGGAAATGTTTACATTTTCGTATTGTTTTCGATTCACTCTATGAATAGTTCTTACTACAAT  
TTTTTTGTCTAAAGAGTAATACTAGAGATAAACATAAAAAATGTAGAGGTCGAGTTTAGATGCAAGTTC  
AAGGAGCGAAAGGTGGATGGGTAGGTTATATAGGGATATAGCACAGAGATATATAGCAAAGAGATAC  
TTTTGAGCAATGTTTGTGGAAGCGGTATTCGCAATATTTTAGTAGCTCGTTACAGTCCGGTGCGTTTT  
TGGTTTTTTGAAAGTGCGTCTTCAGAGCGCTTTTGGTTTTCAAAGCGCTCTGAAGTTCCTATACTTT  
CTAGAGAATAGGAACTTCGGAATAGGAACTTCAAAGCGTTTCCGAAAACGAGCGCTTCCGAAAATGC  
AACGCGAGCTGCGCACATACAGCTCACTGTTACGTCGCACCTATATCTGCGTGTTCCTGTATATA  
TATATACATGAGAAGAACGGCATAGTGCCTGTTTATGCTTAAATGCGTACTTATATGCGTCTATTTATG  
TAGGATGAAAGGTAGTCTAGTACCTCCTGTGATATTATCCCATTCCATGCGGGGTATCGTATGCTTCC  
TTCAGCACTACCCCTTAGCTGTTCTATATGCTGCCACTCCTCAATTGGATTAGTCTCATCCTTCAATGC  
TATCATTCTCTTTGATATTGGATCATACTAAGAAACCTATTATCATGACATTAACCTATAAAAAATAGG  
CGTATCACGAGGCCCTTTTCGTCTCGCGCGTTTTCGGTGATGACGGTGAAAACCTCTGACACATGCAG  
CTCCCGGAGACGGTACAGCTTGTCTGTAAGCGGATGCCGGGAGCAGACAAGCCCGTCAGGGCGC  
GTCAGCGGGTGTGGCGGGTGTGGGGCTGGCTTAACTATGCGGCATCAGAGCAGATTGTACTGAG  
AGTGCACCATACCACAGCTTTTCAATTCAATTCATCATTTTTTTTTTTTATTCTTTTTTTTTGATTTTCGGTTTT  
TTTGAATTTTTTTGATTCGGTAATCTCCGAACAGAAGGAAGAACGAAGGAAGGAGCACAGACTTAGA  
TTGGTATATATACGCATATGTAGTGTGAAGAAACATGAAATTGCCAGTATTCTTAAACCCAACTGCA  
CAGAACAAAAACCTGCAGGAAACGAAGATAAATCATGTCGAAAGCTACATATAAGGAACGTGCTGCT  
ACTCATCCTAGTCTGTTGCTGCCAAGCTATTTAATATCATGCACGAAAAGCAAACAACTTGTGTGC  
TTCATTGGATGTTTCGTACCACCAAGGAATTACTGGAGTTAGTTGAAGCATTAGGTCCCAAAATTTGTT  
TACTAAAAACACATGTGGATATCTTACTGATTTTTCCATGGAGGGCACAGTTAAGCCGCTAAAGGCA  
TTATCCGCCAAGTACAATTTTTTACTCTTCGAAGACAGAAAATTTGCTGACATTGGTAATACAGTCAAA  
TTGCAGTACTCTGCGGGTGTATACAGAATAGCAGAATGGGCAGACATTACGAATGCACACGGTGTG  
GTGGGCCCAGGTATTGTTAGCGGTTTTGAAGCAGGCGGCAGAAGAAGTAACAAAGGAACCTAGAGGC  
CTTTTGATGTTAGCAGAATTGTCATGCAAGGGCTCCCTATCTACTGGAGAATATACTAAGGGTACTGT  
TGACATTGCGAAGAGCGACAAAGATTTTGTATCGGCTTTATTGCTCAAAGAGACATGGGTGGAAGA  
GATGAAGGTTACGATTGTTGATTATGACACCCGGTGTGGGTTTAGATGACAAGGGAGACGCATTGG  
GTCAACAGTATAGAACCCTGGATGATGTGGTCTCTACAGGATCTGACATTATTATTGTTGGAAGAGG  
ACTATTTGCAAAGGGAAGGGATGCTAAGGTAGAGGGTGAACGTTACAGAAAAGCAGGCTGGGAAGC  
ATATTTGAGAAGATGCGGCCAGCAAACAGTTACGCTAGGGATAACAGGGTAATATAGCGTAACTAT  
AACGGTCTAATGTGCAAGAAACATAGTATGCCCACTAACTATAGACAAAAAACGCCATGCACTTG  
GTTGTTGTGCATTAGAATGATATTGATTCATTAAGCAACCCCTTTGTTTAAATGAATACACAAAACCTG  
TATGATGCATCTTCCCCTTAATGAGATGAATCATTATTTAATTTAGAAAAATCTGAAAACCTACTATAA  
TTGTATAGTTTTGAATTTTTTATACCAATAACAAATTAACCTAATTATATATAGATTGAACTATATTACTT  
AATAAAATATTTATCTTAAATGTTGTTGTTGATTCAACACCACAACCTAAAAGTGTTTATAAATTTTT  
GGAAATACACATATTTGTAATGATTAGTATCGATTTAATATCGTATTATTAAATTTTTTATTAATTTTTGT  
GTCTTAATCAAAAAATAATATATGTCATGTTATATTGAAGGTGCAGTTGTTTTTCTTCAAGAGGGG  
GTCAAAAAATACTTTTTGAGGTGATTATATGTTAAGAGGACAAGAAGAAAGAAAGTATAGTATTAGAA  
AGTATTCAATAGGCGTGGTGTGAGTGTAGCGGCTACAATGTTTGTGTTGTCATCACATGAAGCACAA  
GCCTCGGAAAAACATCAACTAATGCAGCGGCACAAAAAGAAACACTAAATCAACCGGGGAGAACAAAG  
GGAATGCGATAACGTCACATCAAATGCAGTCAGGAAAGCAATTAGGAATTCGCTAGCGGATCCCCCG  
GGGTGACATAACCAAACTATTAACACTTCTGATATTCTTAGTTCAAATATCAGAAGTGTTTTATAG  
TGTTATCTAGTTTACAGATAAATATTTCTTACTTAAAAAACGCCCTCCTCTTATTTTGACCCCTATTTAT  
TTAAATCAGACAATTATTTTCATTTTCAAATTATTCTTTCTTCAATATTAGTTAAGCGATATTTAAACGAA



GTTAAGAATTAGTTAATGGCATATTATTTGCCTTCATTTTAACTTAACTTATCAAATTGGTACCACGC  
GTTTATAAGGAGGAAAAACATATGTCTAGAATGACAATGATTACAGATTCATTAGCAGTTGTTTTACAA  
CGTCGTGATTGGGAAAATCCAGGTGTTACACAATTAATCGTTTAGCAGCACATCCACCATTTGCATC  
ATGGCGTAATTCAGAAGAAGCACGTACAGATCGTCCATCACAACAATTACGTTTCAAATGGTGAAT  
GGCGTTTTGCATGGTTCCAGCACCTGAAGCAGTTCAGAATCATGGTTAGAATGTGATTTACCAGA  
AGCAGATACAGTTGTTGTGCCATCAAATTGGCAAATGCATGGTTATGATGCACCAATTTATACAAATG  
TTACATATCCAATTACAGTTAATCCACCTTTTGTCCAACAGAAAATCCAACAGGTTGTTATTCATTA  
CATTTAATGTAGATGAAAGTTGGTTACAAGAAGGTCAAACACGTATCATTTTTGATGGTGTAAATTCAG  
CATTTTCATTTATGGTGTAAATGGTCGTTGGGTTGGTTATGGTCAAGATTCACGTTTACCATCAGAATTT  
GATTTATCAGCATTCTTACGTGCTGGTGAACCGTTTAGCAGTTATGGTTTTACGTTGGTCAGATGG  
TTCATATTTAGAAGATCAAGATATGTGGCGTATGTCAGGTATTTCCGTGATGTTTCATTATTACATAA  
ACCAACAACACAAATTTTCAATTTTCAATGTTGCAACACGTTTTAATGATGATTTTTCACGTGCAGTTTT  
AGAAGCTGAAGTGCAAATGTGTGGTGAATTACGTGATTTTACGTGTTACAGTTTCATTATGGCAAG  
GTGAAACACAAGTTGCATCAGGTACAGCACCATTTGGTGGTGAATAATTGATGAACGTGGTGGTTA  
TGCAGATCGTGTGACATTACGTTTAAATGTTGAAAATCCAAAATTATGGTCAGCAGAAAATCCAAAATT  
ATATCGTGCAGTTGTTGAATTACATACAGCAGATGGTACATTAATTGAAGCTGAAGCATGTGATGTTG  
GTTTCCGTGAAGTTTCGATTGAAAATGGTTTATTATTATTAATGGTAAACCATTATTAATTCGTGGTG  
TTAATCGTCATGAACATCATCCATTACATGGTCAAGTGATGGATGAACAAACAATGTTCAAGATATTT  
TATTAATGAAACAAAATAACTTTAATGCAGTTTCGTTGTTTACATTATCCAAATCATCCATTATGGTATAC  
ATTATGTGATCGTTATGGTTTATATGTTGTTGATGAAGCAAATATTGAAACACATGGTATGGTTCCAAT  
GAATCGTTTAACTGATGATCCACGTTGGTTACCAGCAATGTCAGAACGTGTTACACGTATGGTTCAAC  
GTGATCGTAATCATCCATCAGTGATTATTTGGTCATTAGGTAATGAATCAGGTCATGGTGCAAATCAT  
GATGCGTTATATCGTTGGATTAATCAGTTGATCCATCACGTCCAGTGCAATATGAAGGTGGTGGTG  
CAGATACAACAGCAACGGATATTATTTGTCCAATGTATGCACGTGTTGATGAAGATCAACCATTTCCA  
GCAGTTCCAAAATGGTCAATTAATAAATGGTTATCATTACCAGGTGAAACACGTCCATTAATCTTATGT  
GAATATGCACATGCAATGGGTAATTCATTAGGTGGTTTCGCGAAATATTGGCAAGCATTTCGTCAATA  
TCCACGTTTACAAGGTGGTTTTGTTGGGATTGGGTGGATCAAAGTTTAATAAATATGATGAAAATG  
GTAATCCATGGTCAGCTTATGGTGGTGAATTTGGTGATACACCAAATGATCGTCAATTTTTGTATGAAT  
GGTTTAGTTTTGCAGATCGTACACCACATCCAGCATTAAACAGAAGCAAACATCAACAACAATTTTTT  
CAATTCGTTTATCAGGTCAAACAATTGAAGTTACATCAGAATATTTATTTTCGTATAGTGATAATGAA  
TTATTACATTGGATGGTTGCATTAGATGGTAAACCTTTAGCATCAGGTGAAGTTCCATTAGATGTTGC  
ACCACAAGGTAACAATAATAGAATTACCTGAATTACCACAACCAGAATCAGCAGGTCAATTTATGGT  
TAACAGTTTCGTGTTGTTCAACCAAATGCAACAGCATGGTCAGAAGCAGGTCATATTTACAGCATGGCA  
ACAATGGCGTTTAGCGGAAAATTTATCAGTTACATTACCAGCAGCATCACATGCAATTCACATTTAA  
CAACGTCAGAAATGGATTTTTGATTGAATTAGGTAATAAACGTTGGCAATTTAATCGTCAATCAGGTT  
TTTTATCACAATGTGGATTGGAGATAAAAAACAATTAACACCATTACGTGATCAATTTACACGTG  
CACCATTAGATAATGATATTGGTGTGTCAGAAGCAACACGTATTGATCCAAATGCATGGGTTGAACGT  
TGGAAAGCAGCAGGTCATTATCAAGCTGAAGCAGCGTTATTACAATGTACAGCAGATACATTAGCAG  
ATGCAGTGTTAATTACAACCTGCACATGCATGGCAACATCAAGGTAAAACATTATTCATTTACAGTAAAA  
CGTATCGTATTGTTGTTCAAGTTGCAATTAAGCACAAGTTGCAGAAAAGTTAATTGGTTAGGTTT  
CATCCAGCTCGTATTGTTTTAAATTTGCAATTAGCACAAGTTGCAGAAAAGTTAATTGGTTAGGTTT  
AGGTCCACAAGAAAATTATCCAGATCGTTTAAACAGCAGCATGTTTCGATCGTTGGGATTTACCATTAT  
CAGATATGTATACACCTTATGTTTTTCCATCAGAAAATGGATTAAGATGTGGTACACGTGAATTAACCT  
ATGGTCCACATCAATGGCGTGGTGATTTCCAATTCACATTTACAGTTATTCACAACAACAATTAATG  
GAAACATCACATCGTCATTTATTACATGCAGAAGAAGGTACTTGGTTAAACATTGATGGTTTTACAT  
GGGATTGGTGGTGATGATTCATGGTCAACATCAGTTTCAGCGGAATTTCAATTTACAGCTGGTTCGTT  
ATCATTATCAATTAGTTTGGTGTCAAAAATAACTGCAGGCATGCAAGCTTTTTAAAAGCAAATATGAGC  
CAAATAAATATATTCTAATTTCTACAAAACAAAATTTGAGCAAATTCAGTGTGCGATTTTTTAAGACACTGC  
CCAGTTACATGCAAATTAATAATTTTTCATGATTTTTTATAGTTCTAACAGGGTTAAAATTTGTATAACGA  
AAGTATAATGTTTATATAACGGTCCAATCAACCATTTGTTAATGTTACGAATGATGAACCTGCCACAGC  
CAGAGGTATCTGGCAAGTTAAACCAATCATAACAAGGATGGGATCATGTGCGATTTTTATCGGTGTGGAC  
TTCTGGATTTCAAACGTAAAGGTGCAGAACTTGCCAACCTTCTATACAGGTATTATAAATGACTTGT  
GCGTGTGAAAGCGACTGAAAGTAAAGGAACACAATTGAAAGCAAGTTAATTCATCTTCTGAATTTAA  
TATGCTATGTAAATCGTGCTGTTATCACGGCACATCAGATATAAGTAGCATCACAGTGTGAAATTTAA  
AAATAGATGTCTTAAAGTGAATAAAGCGCCTGTCTCATTAGCGAAAATTAAGGGACAGGCGTATCT  
GTTTATGAGCTTAATAAATTGTATGAATAATATGGTTGATCGAATAACTGTTTATCATGATGATAAATTG

AGTTTTTTAAAATAATGATATATTACATCATTGTTATAGCGTTTTAAGAAATCAACAACCTTTACGATAAAT  
AGTGATTGCTTCGTCATTAGGTCTACGATCAAAATCATGCTCGTTTTTATTACGCGCGACCTGCAGG  
CATGCAAGCTCTGATTTCACTTTTTGCATTCTACAACTGCATAACTCATATGTAAATCGCTCCTTTTT  
AGGTGGCACAATGTGAGGCATTTTCGCTCTTCCGCGGAGGCTAGTTACCCTTAAGTTATTGGTAT  
GACTGGTTTTAAGCGCAAAAAAAGTTGCTTTTTCGTACCTATTAATGTATCGTTAGAAAACCGACTGTA  
AAAAGTACAGTCGGCATTATCTCATATTATAAAAGCCAGTCATTAGGCCTATCTGACAATTCCTGAATA  
GAGTTCATAACAATCCTGCATGATAACCATCACAAACAGAATGATGTACCTGTAAAGATAGCGGTAA  
ATATATTGAATTACCTTTATTAATGAATTTTCTGCTGTAATAATGGGTAGAAGGTAATTACTATTATTA  
TTGATATTTAAGTTAAACCCAGTAAATGAAGTCCATGGAATAATAGAAAGAGAAAAAGCATTTCAGGT  
ATAGGTGTTTTGGGAAACAATTTCCCGAACCATTAATTTCTCTACATCAGAAAGGTATAAATCATAA  
AACTCTTTGAAGTCATTCTTTACAGGAGTCCAAATACCAGAGAATGTTTTAGATACCCATCAAAAATT  
GTATAAAGTGGCTCTAACTTATCCCAATAACCTAACTCTCCGTCGCTATTGTAACCAGTTCTAAAAGC  
TGATTTGAGTTTATCACCTTGTCACTAAGAAAATAAATGCAGGGTAAAAATTTATATCCTTCTGTTTT  
ATGTTTCGGTATAAAACACTAATATCAATTTCTGTGGTTATACTAAAAGTCGTTTGTGTTCAAATAAT  
GATTAATATCTCTTTTCTCTTCCAATTGTCTAAATCAATTTTATAAAGTTCATTTGATATGCCTCCTA  
AATTTTTATCTAAAGTGAATTTAGGAGGCTTACTGTCTGCTTTTCTTATTAGATAAATCAATCCTTTTTAA  
AAGTCAATATTACTGTAACATAAATATATATTTTTAAAAATATCCCACTTTATCCAATTTTCGTTTGTGA  
ACTAATGGGTGCTTTAGTTGAAGAATAAAGACCACATTAAAAAATGTGGTCTTTTTGTGTTTTTTAAAG  
GATTTGAGCGTAGCGAAAAATCCTTTTCTTATCTTGATAATAAGGGTAACTATTGCCGGGATAG  
ACTGTAACATTCTCACGCATAAAATCCCTTTTCAATTTCTAATGTAAATCTATTACCTTATTATTAATTC  
AATTCGCTCATAATTAATCCTTTTTCTTATTACGCAAAATGGCCCGATTTAAGCACACCCCTTTATTCCG  
TTAATGCGCCATGACAGCCATGATAATTACTAATACTAGGAGAAGTTAATAAATACGGGTGATCTAAT  
GATTCAATGATTCAAACCCTTGTGAACCTTTTAGAACAAAAGAGGTTGTAACAAGATTTTCTTACACA  
CTAGCAATGTTAGTAATTTTTAAAATAGGGACTTATATACCAGCTCCAGGAGTAAATCCTGCAGCTTTT  
GATAATCCCCAAGGTTCTCAAGGTGCCACTGAGTTATTAATACTTTTTGGTGGCGGAGCCTTGAAAC  
GATTTTCTATTTTTGCAATGGGTATTGTACCCTACATCACTGCATCAATCGTAATGCAATTATTACAAA  
TGGATATTGTCCCTAAATTCTCAGAATGGGCAAAACAAGGTGAAGTAGGTAGAAGAAAGTTAATAAC  
GTTACTCGTTATTTAGCAATTTCTTAGCATTTATCCAATCTATAGGTATGGCATTCCAATTTAATAATT  
ATCTCAAAGGTGCGCTGATTATCAATCAGTCAATTATGAGTTATTTATTAATAGCACTAGTTTTGACAG  
CAGGAAGTCTTTCTTAATATGGCTTGGTGATCAATCACTCAGTTCGGTGTTGTAATGGTATTTCT  
ATTATCATATTTCCATCAAGCTTATTTAATTATACTCTATCAATGATAGAGTGTCAATATTTTTTTTAGT  
TTTTCATGAAGTTCGATCGAGGGGATCCAAATAAAAACTAGTTTGACAAATAACTCTATCAATGATAGA  
GTGTCAACAAAAAGGAGGAATTAATGATGTCTAGATTAGATAAAAGTAAAGTGATTAACAGCGCATT  
GAGCTGCTTAATGAGGTTCGGAATCGAAGGTTTAAACAACCCGTAAACTCGCCCAGAAGCTAGGTGTAG  
AGCAGCCTACATTGTATTGGCATGTAAAAATAAGCGGGCTTTGCTCGACGCCTTAGCCATTGAGAT  
GTTAGATAGGCACCATACTCACTTTTGCCCTTTAGAAGGGGAAAGCTGGCAAGATTTTTTACGTAATA  
ACGCTAAAAGTTTTAGATGTGCTTTACTAAGTCATCGCGATGGAGCAAAAGTACATTTAGGTACACGG  
CCTACAGAAAAACAGTATGAACTCTCGAAAATCAATTAGCCTTTTTATGCCAACAAGGTTTTTCACTA  
GAGAATGCATTATATGCACTCAGCGCTGTGGGGCATTTTACTTTAGGTTGCGTATTGGAAGATCAAG  
AGCATCAAGTCGCTAAAGAAGAAAGGAAACACCTACTACTGATAGTATGCCGCCATTATTACGACA  
AGCTATCGAATTATTTGATCACCAAGGTGCAGAGCCAGCCTTCTTATTCCGCCCTGAATTGATCATAT  
GCGGATTAGAAAAACAACCTTAAATGTGAAAGTGGGTCTTAAAAGCAGCATAACCTTTTTCCGTGATGG  
TAACTTCACGGTAAACCAAGATAACAAAGAATACAAGAAAATTTTTACAAAAAATCAATTTAACAATTCC  
TTAAAACATGCAGGAATTGACGATTTAAACAATATTAGCTTTGAACAATTCTTATCTTTTTCAATAGCT  
ATAAATTATTTAATAAGTAAGTTAAGGGATGCATAAACTGCATCCCTTAACTTGTTTTTCGTGTGCCTA  
TTTTTTGTGAATCGATTATGTCTTTTTGCGCAGTCGGCTTAAACCAGTTTTTCGCTGGTGCGAAAAAGA  
GTGTCTTGTGACACCTAAATTCAAAATCTATCGGTGATTTTATACCGATTTGATTTTATATATTCTTGA  
ATAACATACGCCGAGTTATCACATAAAAGCGGGAACCAATCATCAAAATTTAACTTCATTGCATAATC  
CATTAACTCTTAAATCTACGATTCCTTGTTCATCAATAAACTCAATCATTTCTTTAATTAATTTATATC  
TATCTGTTGTTGTTTTCTTTAATAATTCATCAACATCTACACCGCCATAAACTATCATATCTTCTTTTTG  
ATATTTAAATTTATTAGGATCGTCCATGTGAAGCATATATCTCACAAAGACCTTTCACACTTCCTGCAAT  
CTGCGGAATAGTCGCATTCAATTCCTTCTGTAATTTATTTTATCTGTTTATAAGATTTATTACCCTCATAC  
ATCACTAGAATATGATAATGCTCTTTTTTATCCTATCTTCTGTATCAGTATCCCTATCATGTAATGGA  
GACACTACAAATTGAATGTGTAACCTTTTTAAATACTCTAACCCTCGGCTTTTGTGATTCTGGATAT  
AAAACAATGTCCAATTACGTCTTGAATTTTTCTTGTTTTTCAGTTTCTTTTATTACATTTTCGCTCA  
TGATATAATAACGGTGCTAATACATTTAACAATAATTTAGTCATAGATAGGCAGCATGCCAGTGTCTGTC

TATCTTTTTTTGTTTAAAATGCACCGTATTCCTCCTTTGCATATTTTTTTATTAGAATACCGGTTGCATC  
TGATTTGCTAATATTATATTTTTCTTTGATTCTATTTAATATCTCATTTTTCTTCTGTTGTAAGTCTTAAAG  
TAACAGCAACTTTTTCTCTTCTTTTCTATCTACAACCATCACTGTACCTCCCAACATCTGTTTTTTTCA  
CTTTAACATAAAAAACAACCTTTTAAACATTA AAAACCCAATATTTATTTATTTGTTTGGACAATGGACAA  
TGGACACCTAGGGGGGAGGTGCGTAGTACCCCTATGTTTTCTCCCCTAAATAACCCCAAAAATCTA  
AGAAAAAAGACCTCAAAAAGGTCTTTAATTAACATCTCAAATTTGCGATTTATTCCAATTTCTTTTTG  
CGTGTGATGCGCTGCGTCCATTA AAAATCCTAGAGCTTTGCAACCGAAAAGTTAATAGCTGTGCGCTAC  
TACTTTGCTTACGCTCTAAGTATATTTTAAGGACTGTACACGCAAAAAGTTTTCTCGGCATAAAAAGT  
ACCTCTACATCTCTAAATCGTCTGTACGCTGTTTCTCACGCTTTCTATCGACCTTCTGGACATTATCCT  
GTACAACATCCATAAACTGTCCCACACGCTCGAATTTGGAATCATTAAAGAATTTCTCTTTAAGCCTAT  
TAAACCCTTTCTCAAACCCAGGGAAATTCGCCCTCGCAGCACGATATAAAGTCACTGTACTATCTTGA  
AATTTCTCTGATACATTCAACTGCTCATTCAAACATCATTCTCTCGCTTTAATTTATTAACCTCTTTAC  
TTTTTTCGTGATACCCCTCTTTCCATGTATTCACTACTTCTTTCAAACCTCTCTACGTTTTTTTAAATC  
TTGATTTTCTGTGTAATAGTCTGTGCTCTTAATATTTTTCGTAATCATCAACAATCCGTTCTGCTCGC  
GCGTTTCGGTGATGACGGTGAAAACCTCTGACACATGCAGCTCCCGGAGACGGTCACAGCTTGTCT  
GTAAGCGGATGCCGGGAGCAGACAAGCCCGTCAGGGCGCGTCAGCGGGTGTGGCGGGTGTCCGG  
GGCGCAGCCATGACCCAGTACGTAGCGATAGCGGAGTGATACTGGCTTAACTATGCGGCATCAG  
AGCAGATTGTAAGTGCACCATATGCGGTGTGAAATACCGCACAGATGCGTAAGGAGAAAATA  
CCGCATCAGGCGCTCTTCCGCTTCTCGCTCACTGACTCGCTGCGCTCGGTGCTTCCGGTGCAGGCG  
AGCGGTATCAGCTCACTCAAAGGCGGTAATACGGTTATCCACAGAATCAGGGGATAACGCAGGAAA  
GAACATGTGAGCAAAAAGGCCAGCAAAAAGGCCAGGAACCGTAAAAAGGCCGCGTTGCTGGCGTTTTT  
CCATAGGCTCCGCCCCCTGACGAGCATCACAAAATCGACGCTCAAGTCAGAGGTGGCGAAACCC  
GACAGGACTATAAAGATACCAGGCGTTTCCCCCTGGAAGCTCCCTCGTGCGCTCTCTGTTCCGAC  
CCTGCCGCTTACCGGATACCTGTCCGCCTTTCTCCCTTCGGGAAGCGTGGCGCTTTCTCATAGCTCA  
CGCTGTAGGTATCTCAGTTCGGTGTAGGTCGTTCCGCTCCAAGCTGGGCTGTGTGCACGAACCCCC  
GTTCCAGCCCGACCGCTGCGCCTTATCCGGTAACTATCGTCTTGAGTCCAACCCGGTAAGACACGACT  
TATCGCCACTGGCAGCAGCCACTGGTAACAGGATTAGCAGAGCGAGGTATGTAGGCGGTGCTACAG  
AGTTCTTGAAGTGGTGGCCTAACTACGGCTACACTAGAAGGACAGTATTTGGTATCTGCGCTCTGCT  
GAAGCCAGTTACCTTCGGAAAAAGAGTTGGTAGCTCTTGATCCGGCAAACAACCCACCGCTGGTAGC  
GGTGGTTTTTTTTGTTTGAAGCAGCAGATTACGCGCAGAAAAAAGGATCTCAAGAAGATCCTTTGAT  
CTTTTCTACGGGTCTGACGCTCAGTGAACGAAAACCTCACGTTAAGGGATTTTGGTCATGAGATTA  
TCAAAAAGGATCTTACCTAGATCCTTTTTAAATTA AAAATGAAGTTTTAAATCAATCTAAAGTATATAG  
AGTAAACTTTGGTCTGACAGTTACCAATGCTTAATCAGTGAGGCACCTATCTCAGCGATCTGTCTATTT  
CGTTCATCCATAGTTGCCGACTCCCGTCTGTAGATAACTACGATACGGGAGGGCTTACCATCTG  
GCCCCAGTGCTGCAATGATACCGCGAGACCCACGCTCACCGGCTCCAGATTTATCAGCAATAAACC  
AGCCAGCCGGAAGGGCCGAGCGCAGAAGTGGTCCTGCAACTTTATCCGCCTCCATCCAGTCTATTA  
ATTGTTGCCGGGAAGCTAGAGTAAGTAGTTCGCCAGTTAATAGTTTTCGCAACGTTGTTGCCATTGC  
TGCAGGCATCGTGGTGTACGCTCGTCGTTTGGTATGGCTTCATTAGCTCCGGTCCCAACGATCA  
AGGCGAGTTACATGATCCCCATGTTGTGCAAAAAGCGGTTAGCTCCTTCGGTCTCCGATCGTTG  
TCAGAAGTAAGTTGGCCGAGTGTATCACTCATGGTTATGGCAGCACTGCATAATTTCTTACTGTC  
ATGCCATCCGTAAGATGCTTTTTCTGTGACTGGTGTAGTACTCAACCAAGTCATTCTGAGAATAGTGTAT  
GCGGCGACCGAGTTGCTCTTGCCCGGCGTCAACACGGGATAATACCGCGCCACATAGCAGAACTTT  
AAAAGTGCTCATCATTGAAAACGTTCTTCCGGGGCGAAAACCTCTCAAGGATCTTACCGCTGTTGAGA  
TCCAGTTCGATGTAACCCACTCGTGACCCCAACTGATCTTACGCATCTTTTACTTTTACCAGCGTTTC  
TGGGTGAGCAAAAACAGGAAGGCAAAAATGCCGCAAAAAGGGGAATAAGGGCGACACGGAAATGTTG  
AATACTCATACTCTTCTTTTTCAATATTATTGAAGCATTATCAGGGTTATTGTCTCATGAGCGGATA  
CATATTTGAATGATTTAGAAAAATAAACAATAGGGGTTCGCGCACATTTCCCCGAAAAGTGCCAC  
CTGACGTCTAAGAAACCATTATTA

**pJB38\_P1sae\_TIR RBS\_EcFbFP**

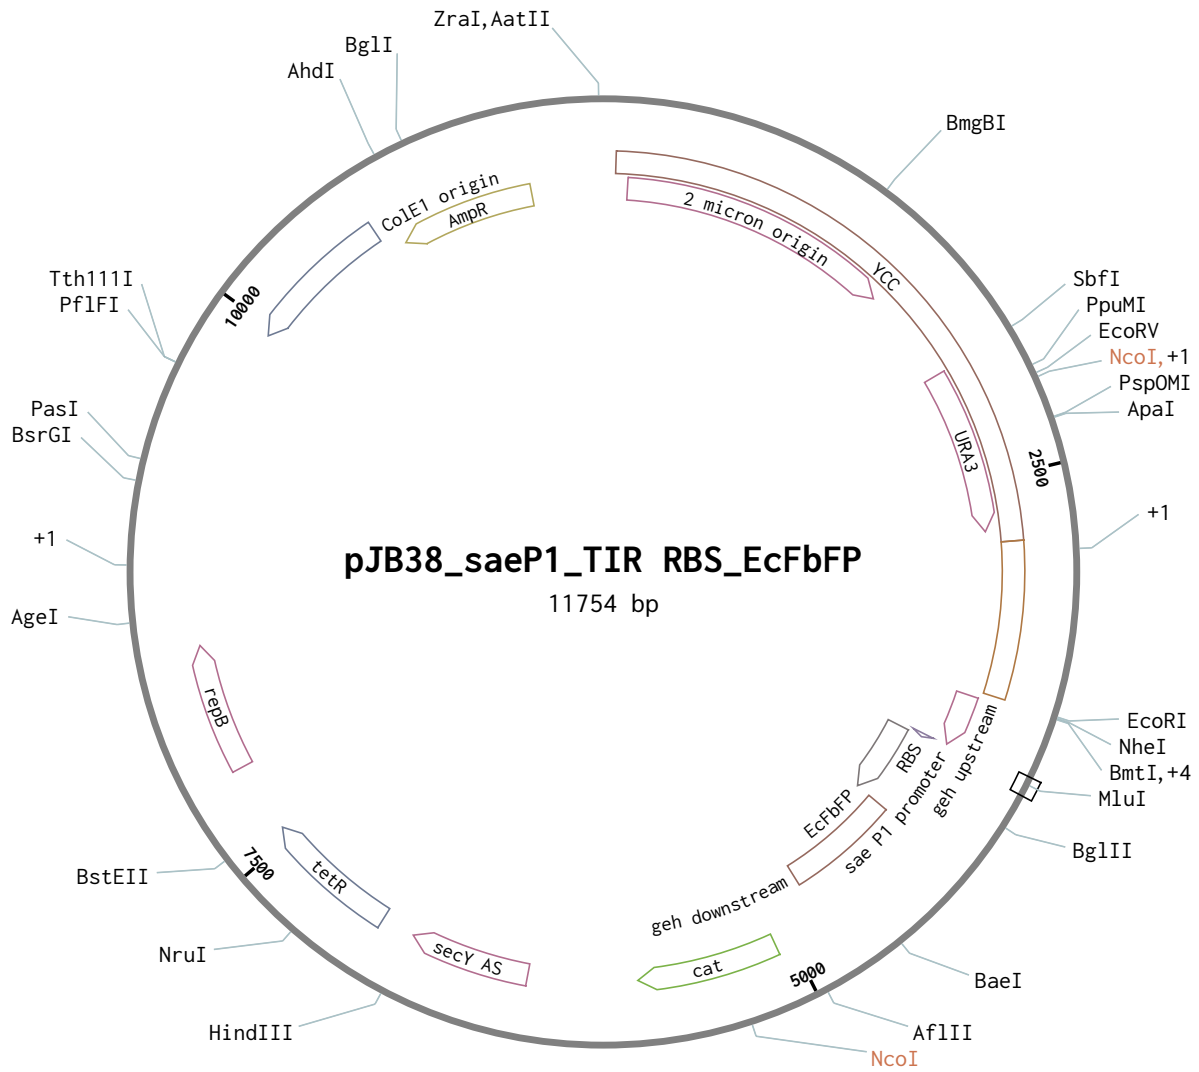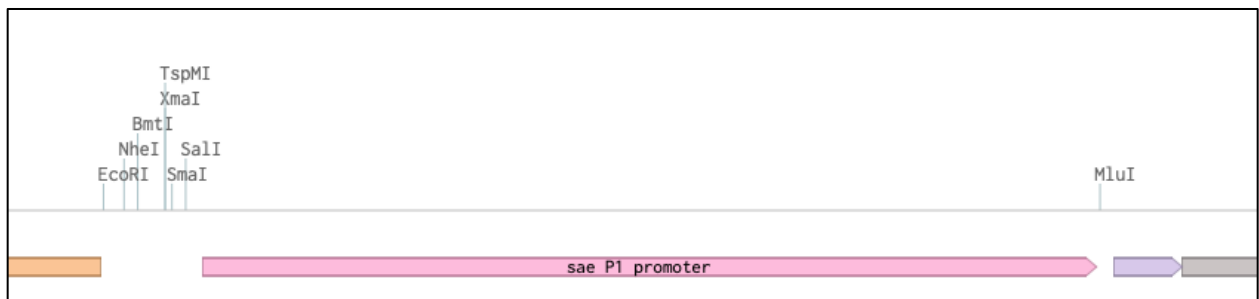

TCATGACATTAACCTATAAAAAATAGGCGTATCACGAGGCCCTTTTCGTCTTCAAGAATTGGTGGCACCTT  
TTCGGGGAAAAGTTACGCTAGGGATAACAGGGTAATATAGCACCTGAACGAAGCATCTGTGCTTCAT  
TTTGTAGAACAAAAATGCAACGCGAGAGCGCTAATTTTTTCAAACAAAGAATCTGAGCTGCATTTTTTAC  
AGAACAGAAATGCAACGCGAAAGCGCTATTTTACCAACGAAGAATCTGTGCTTCATTTTTGTAAACA

AAAATGCAACGCGAGAGCGCTAATTTTTCAAACAAGAATCTGAGCTGCATTTTTACAGAACAGAAAT  
GCAACGCGAGAGCGCTAATTTTACCAACAAAGAATCTATACTTCTTTTTTTGTTCTACAAAAATGCATCCC  
GAGAGCGCTAATTTTTCTAACAAAGCATCTTAGATTACTTTTTTTCTCCTTTGTGCGCTCTATAATGCAG  
TCTCTTGATAACTTTTTGCACTGTAGGTCCGTTAAGGTTAGAAGAAGGCTACTTTGGTGTCTATTTTTCT  
CTTCATAAAAAAAGCCTGACTCCACTTCCCGCGTTTACTGATTACTAGCGAAGCTGCGGGTGCATTT  
TTTCAAGATAAAGGCATCCCCGATTATATTCTATACCGATGTGGATTGCGCATACTTTGTGAACAGAA  
AGTGATAGCGTTGATGATTCTTCATTGGTCAGAAAATTATGAACGGTTTCTTCTATTTTTGTCTCTATAT  
ACTACGTATAGGAAATGTTTACATTTTCGTATTGTTTTCGATTCACTCTATGAATAGTTCCTACTACAAT  
TTTTTTGTCTAAAGAGTAATACTAGAGATAAACATAAAAAATGTAGAGGTGCGAGTTTAGATGCAAGTTC  
AAGGAGCGAAAGGTGGATGGGTAGGTTATATAGGGATATAGCACAGAGATATATAGCAAAGAGATAC  
TTTTGAGCAATGTTTGTGGAAGCGGTATTCGCAATATTTTAGTAGCTCGTTACAGTCCGGTGCGTTTT  
TGGTTTTTTGAAAGTGCGTCTTCAGAGCGCTTTTGGTTTTCAAAGCGCTCTGAAGTTCCTATACTTT  
CTAGAGAATAGGAACTTCGGAATAGGAACTTCAAAGCGTTTCCGAAAACGAGCGCTTCCGAAAATGC  
AACGCGAGCTGCGCACATACAGCTCACTGTTACAGTCGCACCTATATCTGCGTGTTCCTGTATATA  
TATATACATGAGAAGAACGGCATAAGTGCCTGTTTATGCTTAAATGCGTACTTATATGCGTCTATTTATG  
TAGGATGAAAGGTAGTCTAGTACCTCCTGTGATATTATCCCATTCCATGCGGGGTATCGTATGCTTCC  
TTCAGCACTACCCTTTAGCTGTTCTATATGCTGCCACTCCTCAATTGGATTAGTCTCATCCTTCAATGC  
TATCATTTCCTTTGATATTGGATCATACTAAGAAACCATTATTATCATGACATTAACCTATAAAAAATAGG  
CGTATCACGAGGCCCTTTTCGTCTCGCGCGTTTTCGGTGATGACGGTGAAAACCTCTGACACATGCAG  
CTCCCGGAGACGGTACAGCTTGTCTGTAAGCGGATGCCGGGAGCAGACAAGCCCGTCAGGGCGC  
GTCAGCGGGTGTGGCGGGTGTGGGGCTGGCTTAACTATGCGGCATCAGAGCAGATTGTAAGTGCAG  
AGTGCACCATACCACAGCTTTTCAATTCAATTCATCATTTTTTTTTTTTATTCTTTTTTTTATTCTCGGTTTC  
TTTGAAATTTTTTTTATTGCGTAATCTCCGAACAGAAGGAAGAACGAAGGAAGGAGCACAGACTTAGA  
TTGGTATATATACGCATATGTAGTGTGAAGAAACATGAAATTGCCAGTATTCTTAAACCAACTGCA  
CAGAACAAAAACCTGCAGGAAACGAAGATAAATCATGTCGAAAGCTACATATAAGGAACGTGCTGCT  
ACTCATCCTAGTCTGTTGCTGCCAAGCTATTTAATATCATGCACGAAAAGCAAACAACCTTGTGTGC  
TTCATTGGATGTTTCGTACCACCAAGGAATTACTGGAGTTAGTTGAAGCATTAGGTCCCAAAATTTGTT  
TACTAAAAACACATGTGGATATCTTACTGATTTTTTCCATGGAGGGCACAGTTAAGCCGCTAAAGGCA  
TTATCCGCCAAGTACAATTTTTTACTCTTCGAAGACAGAAAATTTGCTGACATTGGTAATACAGTCAA  
TTGCAGTACTCTGCGGGTGTATACAGAATAGCAGAATGGGCAGACATTACGAATGCACACGGTGTG  
GTGGGCCCAGGTATTGTTAGCGGTTTTGAAGCAGGCGGCAGAAGAAGTAACAAAGGAACCTAGAGGC  
CTTTTATGTTAGCAGAATTGTCATGCAAGGGCTCCCTATCTACTGGAGAATATACTAAGGGTACTGT  
TGACATTGCGAAGAGCGACAAAGATTTTGTATCGGCTTTATTGCTCAAAGAGACATGGGTGGAAGA  
GATGAAGGTTACGATTGTTGATTATGACACCCGGTGTGGGTTTAGATGACAAGGGAGACGCATTGG  
GTCAACAGTATAGAACCGTGGATGATGTGGTCTCTACAGGATCTGACATTATTATTGTTGGAAGAGG  
ACTATTTGCAAAGGGAAGGGATGCTAAGGTAGAGGGTGAACGTTACAGAAAAGCAGGCTGGGAAGC  
ATATTTGAGAAGATGCGGCCAGCAAAACAGTTACGCTAGGGATAACAGGGTAATATAGCGTAACTAT  
AACGGTCTTAATGTGCAAGAAACATAGTATGCCCACTAACTATAGACAAAAAACGCCATGCACTTG  
GTTGTTGTGCATTAGAATGATATTGATTCATTAAGCAACCCCTTTGTTTAAATGAATACACAAAACCTG  
TATGATGCATCTCCCTTAAATGAGATGAATCATTATTTTAAATTTAGAAAAATCTGAAAACCTACTATAA  
TTGTATAGTTTTGAATTTTTTATACCAATAACAAATTAACCTAATTATATATAGATTGAAACTATATTACT  
AATAAAATATTTTATCTTAAATGTTGTTGTTGATTCAACACCACAACCTAAAAGTGTTTATAAATTTT  
GGAAATACACATATTTGTAATGATTAGTATCGATTTAATATCGTATTATTAAATTTTTTATTAAATTTTGT  
GTCTTAATCAAAAAATAATATATGTCATGTTATATTGAAGGTGCAGTTGTTTTTCTTCTCAAGAGGGG  
GTCAAAAAAATACTTTTGGAGGTGATTATATGTTAAGAGGACAAGAAGAAAGAAAGTATAGTATTAGAA  
AGTATTCAATAGGCGTGGTGTGAGTGTAGCGGCTACAATGTTTGTGTTGTCATCACATGAAGCACAA  
GCCTCGGAAAAACATCAACTAATGCAGCGGCACAAAAAGAAACACTAAATCAACCGGGAGAACAAAG  
GGAATGCGATAACGTCACATCAAATGCAGTCAGGAAAGCAATTAGGAATTCGCTAGCGGATCCCCCG  
GGGTGCACATACCAAACTATTAACACTTCTGATATTCTTAGTTCAAATATCAGAAGTGTTTTATAG  
TGTTATCTAGTTTACAGATAAATATTTCTTACTTAAAAAACGCCCTCCTCTTATTTTACCCCTATTTTAT  
TTAAATCAGACAATTATTTTCAATTTTCAAATTTCTTTCTTCAATATTAGTTAAGCGATATTTAAACGAA  
GTTAAGAATTAGTTAATGGCATATTATTTGCCTTCAATTTTAACTTAACTTATCAAATTACGCGTTTATA  
AGGAGGAAAAACATATGGCATCATTCCAGTCTTTCCGGTATACCAGGCCAATTAGAGGTTATCAAGAA  
GGCGTTAGATCATGTACGTGTTGGAGTTGTAATTAAGTATGCTGATTAGAGGACAACCCCTATCGTGT  
ATGTTAATCAGGGATTTGTGACAGATGACTGGATACGAGACGGAAGAGATCTTAGGCAAGAACGCTCG  
TTTCTTGCAAGGAAAACACACAGACCCGGCAGAAGTCGATAATATAAGAACGGCTTTACAGAATAAG

GAGCCGGTTACGGTTCAAATCCAGAACTATAAAAAGGATGGAECTATGTTTTGGAATGAGTTGAACAT  
AGACCCGATGGAAATAGAGGACAAAACGTACTTTGTAGGCATCCAAAACGATATTACAAAACAAAAG  
GAGTACGAGAAGTTGTTGGAGTAGGTCCAATCAACCATTTGTTAATGTTACGAATGATGAACCTGCCA  
CACGCAGAGGTATCTGGCAAGTTAAACCAATCATACAAGGATGGGATCATGTGCGATTTTATCGGTGT  
GGACTTCCTGGATTTCAAACGTAAAGGTGCAGAACTTGCCAACTTCTATACAGGTATTATAAATGACT  
TGTTGCGTGTGAAAGCGACTGAAAGTAAAGGAACACAATTGAAAGCAAGTTAAATTCATCTTCTGAAT  
TTAATATGCTATGTAATCGTGCTGTTATCACGGCACATCAGATATAAGTAGCATCACAGTGTGAAAT  
TAAAAATAGATGTCTTAAAGTAAATAAAGCGCCTGTCTCATTAGCGAAAACCTAAAGGGACAGGCGTA  
TCTGTTTTATGAGCTTAATAAATTGTATGAATAATATGGTTGATCGAATAACTGTTTATCATGATGATAAA  
TTGAGTTTTTTAAAATAATGATATATTACATCATTGTTATAGCGTTTAAAGAAATCAACAACCTTACGATA  
AATAGTGATTGCTTCGTCAATTAGGTCTACGATCAAAATCATGCTCGTTTTTATTCACGCGCTGCAGGC  
ATGCAAGCTCTGATTTCACTTTTTGCATTCTACAACTGCATAACTCATATGTAATCGCTCCTTTTTA  
GGTGGCACAAATGTGAGGCATTTTCGCTCTTCCGGCGAGGCTAGTTACCCTTAAGTTATTGGTATG  
ACTGGTTTTAAGCGCAAAAAAAGTTGCTTTTTCGTACCTATTAATGTATCGTTAGAAAACCGACTGTAA  
AAAGTACAGTCGGCATTATCTCATATTATAAAAGCCAGTCATTAGGCCTATCTGACAATTCCTGAATA  
GAGTTCATAAAACAATCCTGCATGATAACCATCACAACAGAAATGATGTACCTGTAAAGATAGCGGTAA  
ATATATTTGAATTACCTTTTATTAATGAATTTTCTGCTGTAATAATGGGTAGAAGGTAATTACTATTATTA  
TTGATATTTAAGTTAAACCCAGTAAATGAAGTCCATGGAATAATAGAAAGAGAAAAAGCATTTCAGGT  
ATAGGTGTTTTGGGAAACAATTTCCCGAACCATTATTTTCTCTACATCAGAAAGGTATAAATCATAA  
AACTCTTTGAAGTCATTCTTTACAGGAGTCCAAATACCAGAGAATGTTTTAGATACACCATCAAAAATT  
GTATAAAGTGGCTCTAACTTATCCCAATAACCTAACTCTCCGTCGCTATTGTAACCAGTTCTAAAAGC  
TGTATTTGAGTTTATCACCCTTGTCACTAAGAAAATAAATGCAGGGTAAAATTTATATCCTTCTGTTTT  
ATGTTTCGGTATAAAACACTAATATCAATTTCTGTGGTTATACTAAAAGTCGTTTGTGGTTCAAATAAT  
GATTAATATCTCTTTTCTCTTCCAATTGTCTAAATCAATTTTATTAAGTTCATTTGATATGCCTCCTA  
AATTTTTATCTAAAGTGAATTTAGGAGGCTTACTTGTCTGCTTTCTTATTAGAAATCAATCCTTTTTTAA  
AAGTCAATATTACTGTAACATAAATATATATTTTAAAAATATCCCACTTTATCCAATTTTCGTTTGTGA  
ACTAATGGGTGCTTTAGTTGAAGAATAAAGACCACATTAAAAAATGTGGTCTTTTGTGTTTTTTTTAAAG  
GATTTGAGCGTAGCGAAAAATCCTTTTCTTTCTTATCTTGATAATAAGGGTAACTATTGCCGGGATAG  
ACTGTAACATTCTCACGCATAAAATCCCTTTTCAATTTTCTAATGTAAATCTATTACCTTATTATTAATTC  
AATTCGCTCATAATTAATCCTTTTTCTTATTACGCAAAATGGCCCGATTAAAGCACACCCTTTATTCCG  
TTAATGCGCCATGACAGCCATGATAATTAATACTAGGAGAAGTTAATAAATACGGGTGATCTAAT  
GATTCAATGATTCAAACCTTGTGAACCTTTTAGAACAAAAGAGGTTTCGTAACAAGATTTTCTTACACA  
CTAGCAATGTTAGTAATTTTTAAAATAGGGACTTATATACCAGCTCCAGGAGTAAATCCTGCAGCTTTT  
GATAATCCCCAAGGTTCTCAAGGTGCCACTGAGTTATTAATACTTTTTGGTGGCGGAGCCTTGAAAC  
GATTTTCTATTTTTGCAATGGGTATTGTACCCTACATCACTGCATCAATCGTAATGCAATTATTACAAA  
TGGATATTGTCCCTAAATTCTCAGAATGGGCAAAAACAAGGTGAAGTAGGTAGAAGAAAGTTAAATAAC  
GTTACTCGTTATTTAGCAATTTCTTAGCATTTATCCAATCTATAGGTATGGCATTCCAATTTAATAAAT  
ATCTCAAAGGTGCGCTGATTATCAATCAGTCAATTATGAGTTATTTAATAAGCACTAGTTTTGACAG  
CAGGAAGTCTTTCTTAATATGGCTTGGTATCAATCACTCAGTTCGGTGTGGTAATGGTATTTCT  
ATTATCATATTTCCCATCAAGCTTATTTAATACTACTATCAATGATAGAGTGTCAATATTTTTTTTAGT  
TTTTCATGAAGTTCGATCGAGGGGATCCAAATAAAAAACTAGTTTGACAAATAACTCTATCAATGATAGA  
GTGTCAACAAAAGGAGGAATTAATGATGTCTAGATTAGATAAAAGTAAAGTGATTAACAGCGCATTGA  
GAGCTGCTTAATGAGGTCGGAATCGAAGGTTTAAACAACCCGTAAACTCGCCCAGAAGCTAGGTGTAG  
AGCAGCCTACATTGTATTGGCATGTAAAAAATAAGCGGGCTTTGCTCGACGCCTTAGCCATTGAGAT  
GTTAGATAGGCACCATACTCACTTTTGCCCTTTAGAAGGGGAAAGCTGGCAAGATTTTTTACGTAATA  
ACGCTAAAAGTTTTAGATGTGCTTTACTAAGTCATCGCGATGGAGCAAAAGTACATTTAGGTACACGG  
CCTACAGAAAAACAGTATGAACTCTCGAAAATCAATTAGCCTTTTTATGCCAACAAGTTTTTCACTA  
GAGAATGCATTATATGCACTCAGCGCTGTGGGGCATTACTTTAGGTTGCGTATTGGAAGATCAAG  
AGCATCAAGTCGCTAAAGAAGAAAGGGAAACACCTACTACTGATAGTATGCCGCCATTATTACGACA  
AGCTATCGAATTATTTGATCACCAGGTGCAGAGCCAGCCTTCTTATTCCGGCCTTGAATTGATCATAT  
GCGGATTAGAAAAACAACCTTAAATGTGAAAGTGGGTCTTAAAAGCAGCATAACCTTTTTCCGTGATGG  
TAACTTCACGGTAACCAAGATAACAAAGAATACAAGAAAATATTTACAAAAAATCAATTTAACAATTCC  
TTAAAACATGCAGGAATTGACGATTTAACAATATTAGCTTTGAACAATTCTTATCTTTTTCAATAGCT  
ATAAATTTAATAAGTAAGTTAAGGGATGCATAAACTGCATCCCTTAACTTGTTTTTCGTGTGCCTA  
TTTTTTGTGAATCGATTATGTCTTTTGCAGTCCGGCTTAAACCAGTTTTTCGCTGGTGCAGAAAAAGA  
GTGTCTTGTGACACCTAAATTCAAAATCTATCGGTCAGATTTATACCGATTTGATTTTATATATTCTTGA

ATAACATACGCCGAGTTATCACATAAAAGCGGGAACCAATCATCAAATTTAAACTTCATTGCATAATC  
CATTAAACTCTTAAATTCTACGATTCCTTGTTTCATCAATAAACTCAATCATTTCTTTAATTAATTTATATC  
TATCTGTTGTTGTTTTCTTTAATAATTCATCAACATCTACACCGCCATAAACTATCATATCTTCTTTTTG  
ATATTTAAATTTATTAGGATCGTCCATGTGAAGCATATATCTCACAGACCTTTCACACTTCCTGCAAT  
CTGCGGAATAGTCGCATTCAATTCTTCTGTAATTATTTTTATCTGTTTCATAAGATTTATTACCTCATAC  
ATCACTAGAATATGATAATGCTCTTTTTTCATCCTATCTTCTGTATCAGTATCCCTATCATGTAATGGA  
GACACTACAAATTGAATGTGAACTCTTTAAATACTCTAACCCTCGGCTTTTTGCTGATTCTGGATAT  
AAAACAAATGTCCAATTACGTCCTCTTGAATTTTTCTTGTTCAGTTTCTTTTATTACATTTTCGCTCA  
TGATATAATAACGGTGCTAATACATTTAAACAAAATTTAGTCATAGATAGGCAGCATGCCAGTGCTGTC  
TATCTTTTTTTGTTTAAATGCACCGTATTCCTCCTTTGCATATTTTTTTATTAGAATACCGGTTGCATC  
TGATTTGCTAATATTATTTTTCTTTGATTCTATTTAATATCTCATTTTCTTCTGTTGTAAGCTTAAAG  
TAACAGCAACTTTTTCTTCTTTTCTATCTACAACCATCACTGTACCTCCCAACATCTGTTTTTTTCA  
CTTTAACATAAAAAACAACCTTTTAAACATTAACCAATATTTATTTATTTGTTTGGACAATGGACAA  
TGGACACCTAGGGGGGAGGTTCGTAGTACCCCCCTATGTTTTCTCCCCTAAATAACCCCAAAAATCTA  
AGAAAAAAGACCTCAAAAAGGTCTTTAATTAACATCTCAAATTTTCGATTTATTCCAATTTCTTTTTG  
CGTGATGCGCTGCGTCCATTAATAATCCTAGAGCTTTGCAACCGAAAAGTTAATAGCTGTGCTGCTAC  
TACTTTTCGCTTACGCTCTAAGTATATTTTAAAGGACTGTACACGCAAAAAGTTTTCTCGGCATAAAAGT  
ACCTCTACATCTCTAAATCGTCTGTACGCTGTTTCTCACGCTTCTATCGACCTTCTGGACATTATCCT  
GTACAACATCCATAAACTGTCCCACACGCTCGAATTTGGAATCATTAAAGAATTTCTCTTTAAGCCTAT  
TAAACCCTTTCTCAAACCCAGGGAAATTCGCCCTCGCAGCACGATATAAAGTCACTGTACTATCTTGA  
AATTTCTCTGATACATTCAACTGCTCATTCAAACATCATTCTCTCGCTTTAATTTATTAACCTCTTTAC  
TTTTTTCGTGATACCCCTCTTTCCATGTATTCACTACTTCTTTCAAACCTCTCTCTACGTTTTTTAATTC  
TTGATTTTCTGTGTAATAGTCTGTGCTCTTAATATTTTCGTAATCATCAACAATCCGTTCTGCTCGC  
GCGTTTCGGTGATGACGGTGAAAACCTCTGACACATGCAGCTCCCGGAGACGGTCACAGCTTGTCT  
GTAAGCGGATGCCGGGAGCAGACAAGCCCGTCAGGGCGCGTCAGCGGGTGTGGCGGGTGTGCGG  
GGCGCAGCCATGACCCAGTCACGTAGCGATAGCGGAGTGTATACTGGCTTAACTATGCGGCATCAG  
AGCAGATTGACTGAGAGTGCACCATATGCGGTGTGAAATACCGCACAGATGCGTAAGGAGAAAATA  
CCGCATCAGGCGCTCTTCCGCTTCTCGCTCACTGACTCGCTGCGCTCGGTTCGTTCCGGCTGCGGCG  
AGCGGTATCAGCTCACTCAAAGGCGGTAATACGGTTATCCACAGAATCAGGGGATAACGCAGGAAA  
GAACATGTGAGCAAAAAGGCCAGCAAAAAGGCCAGGAACCGTAAAAAGGCCGCGTTGCTGGCGTTTTT  
CCATAGGCTCCGCCCCCTGACGAGCATCACAAAATCGACGCTCAAGTCAGAGGTGGCGAAACCC  
GACAGGACTATAAAGATACCAGGCGTTTTCCCCCTGGAAGCTCCCTCGTGCGCTCTCCTGTTCCGAC  
CCTGCCGCTTACCGGATACCTGTCCGCTTTCTCCCTTCGGGAAGCGTGGCGCTTTCTCATAGCTCA  
CGCTGTAGGTATCTCAGTTCGGTGTAGGTCGTTTCGCTCCAAGCTGGGCTGTGTGCACGAACCCCC  
GTTTCAGCCCGACCGCTGCGCCTTATCCGGTAACTATCGTCTTGAGTCCAACCCGGTAAGACACGACT  
TATCGCCACTGGCAGCAGCCACTGGTAACAGGATTAGCAGAGCGAGGTATGTAGGCGGTGCTACAG  
AGTTCTTGAAGTGGTGGCCTAACTACGGCTACACTAGAAGGACAGTATTTGGTATCTGCGCTCTGCT  
GAAGCCAGTTACCTTCGAAAAAGAGTTGGTAGCTCTTGATCCGGCAAACAACCCACCGCTGGTAGC  
GGTGGTTTTTTGTTTGAAGCAGCAGATTACGCGCAGAAAAAAGGATCTCAAGAAGATCCTTTGAT  
CTTTTCTACGGGGTCTGACGCTCAGTGAACGAAAACTCACGTTAAGGGATTTTGGTTCATGAGATTA  
TCAAAAAGGATCTTACCTAGATCCTTTTTAAATTAATAAATGAAGTTTTTAAATCAATCTAAAGTATATG  
AGTAAACTTGGTCTGACAGTTACCAATGCTTAATCAGTGAGGCACCTATCTCAGCGATCTGTCTATTT  
CGTTCATCCATAGTTGCCGACTCCCCGTCGTGTAGATAACTACGATACGGGAGGGCTTACCATCTG  
GCCCCAGTGCTGCAATGATACCGCGAGACCCACGCTCACCGGCTCCAGATTTATCAGCAATAAACC  
AGCCAGCCGGAAGGGCCGAGCGCAGAAGTGGTCCTGCAACTTTATCCGCCTCCATCCAGTCTATTA  
ATTGTTGCCGGAAGCTAGAGTAAGTAGTTCGCCAGTTAATAGTTTTCGCAACGTTGTTGCCATTGC  
TGCAGGCATCGTGGTGTACGCTCGTCGTTTGGTATGGCTTCATTCAGCTCCGGTTCCCAACGATCA  
AGGCGAGTTACATGATCCCCATGTTGTGCAAAAAGCGGTTAGCTCCTTCGGTCTCCGATCGTTG  
TCAGAAGTAAGTTGGCCGAGTGTATCACTCATGGTTATGGCAGCACTGCATAATTCTTACTGTC  
ATGCCATCCGTAAGATGCTTTTCTGTGACTGGTGTGACTCAACCAAGTCATTCTGAGAATAGTGAT  
GCGGCGACCGAGTTGCTCTTGCCCGGCGTCAACACGGGATAATACCGCGCCACATAGCAGAACTTT  
AAAAGTGCTCATCATTGAAAACGTTCTTCGGGGCGAAAACCTCTCAAGGATCTTACCGCTGTTGAGA  
TCCAGTTTCGATGTAACCCACTCGTGCACCCAACCTGATCTTCAGCATCTTTTACTTTTACCAGCGTTTC  
TGGGTGAGCAAAAACAGGAAGGCCAAAATGCCGCAAAAAGGGGAATAAGGGCGACACGGAAATGTTG  
AATACTCATACTCTTCTTTTTCAATATTATTGAAGCATTATCAGGGTTATTGTCTCATGAGCGGATA

CATATTTGAATGTATTTAGAAAAATAACAAATAGGGGTTCGCGCACATTTCCCCGAAAAGTGCCAC  
CTGACGTCTAAGAAACCATTATTA

### pCM28\_P1sae\_TIR RBS\_EcFbFp

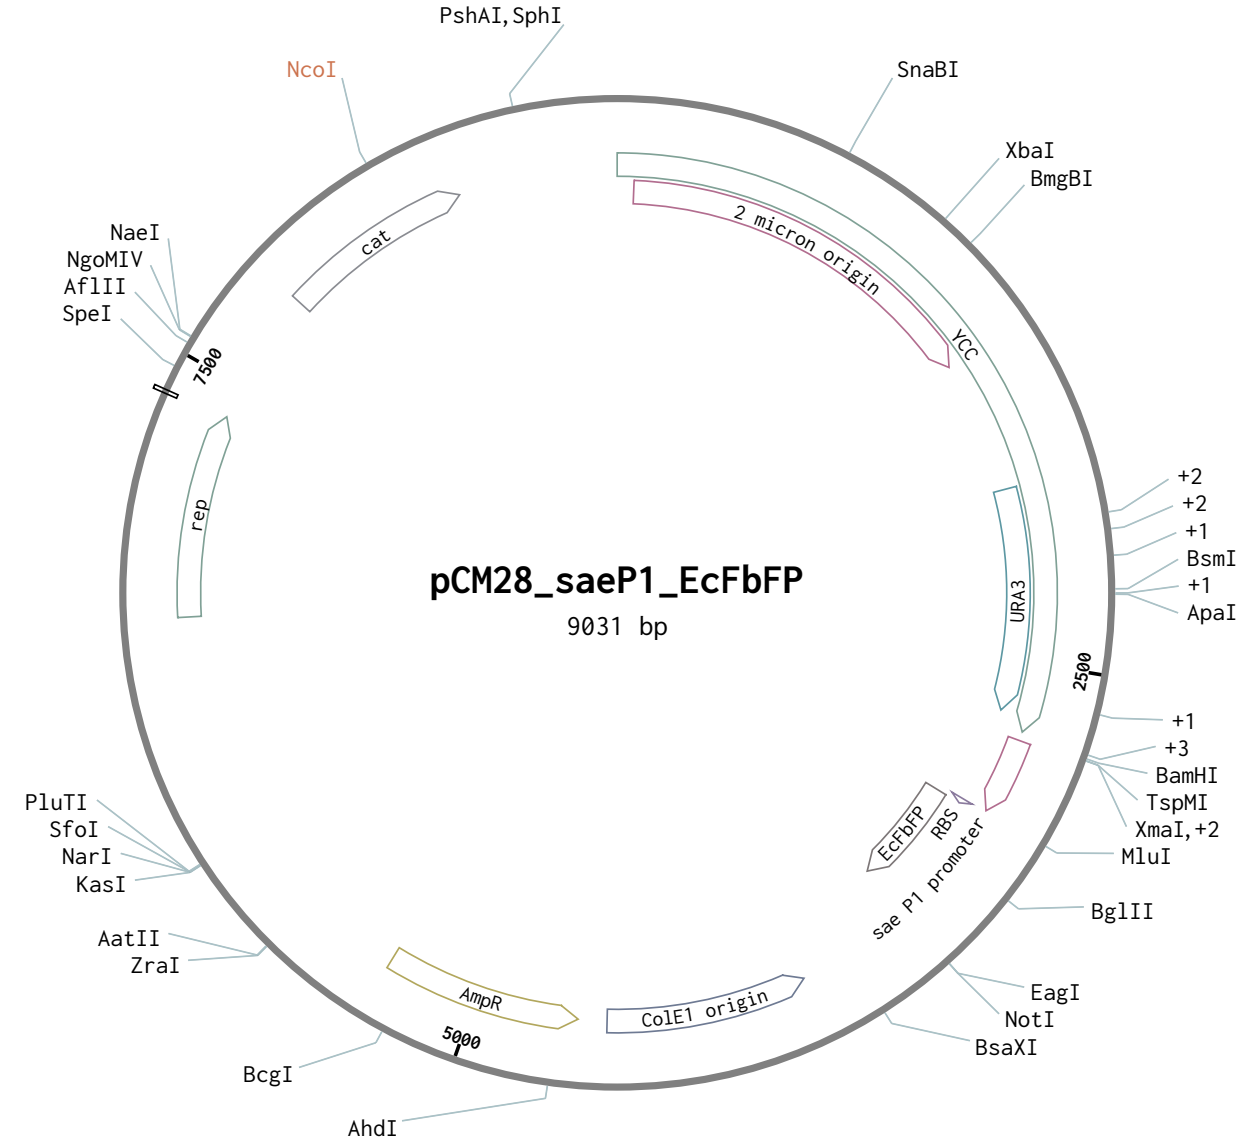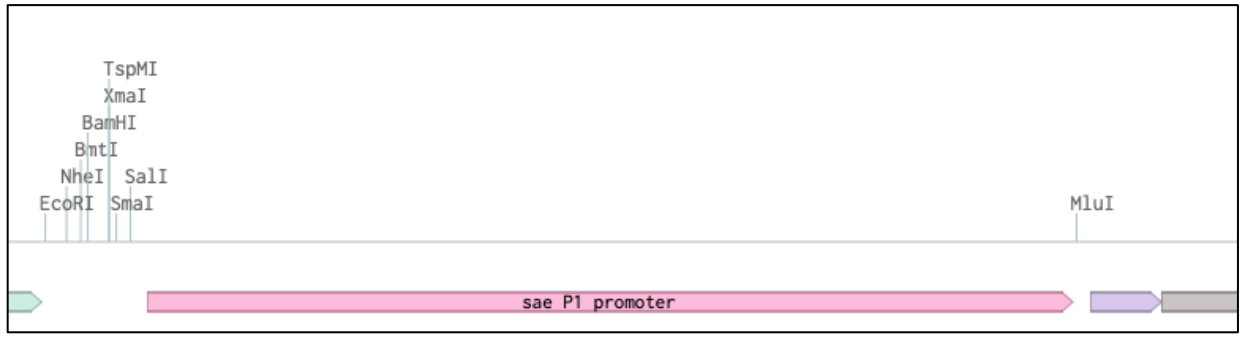



GGTGGCACTTTTCGGGGAAAAGTTACGCTAGGGATAACAGGGTAATATAGCACCTGAACGAAGCATC  
TGTGCTTCATTTTGTAGAACAAAAATGCAACGCGAGAGCGCTAATTTTTCAAACAAAGAATCTGAGCT  
GCATTTTTACAGAACAGAAATGCAACGCGAAAGCGCTATTTTACCAACGAAGAATCTGTGCTTCATTT  
TTGTAACAAAAATGCAACGCGAGAGCGCTAATTTTTCAAACAAAGAATCTGAGCTGCATTTTTACA  
GAACAGAAATGCAACGCGAGAGCGCTATTTTACCAACAAAGAATCTATACTTCTTTTTTGTCTACAAA  
AATGCATCCCGAGAGCGCTATTTTTCTAACAAAGCATCTTAGATTACTTTTTTCTCCTTTGTGCGCTC  
TATAATGCAGTCTCTTGATAACTTTTTGCACTGTAGGTCCGTTAAGGTTAGAAGAAGGCTACTTTGGT  
GTCTATTTTTCTTCCATAAAAAAAGCCTGACTCCACTTCCCGCTTTACTGATTACTAGCGAAGCTG  
CGGGTGCATTTTTCAAGATAAAGGCATCCCCGATTATATTCTATACCGATGTGGATTGCGCATACTT  
TGTGAACAGAAAGTGATAGCGTTGATGATTCTTCATTGGTCAGAAAATTATGAACGGTTTTCTTCTATTT  
TGTCTCTATACTACGTATAGGAAATGTTTACATTTTCGTATTGTTTTCGATTCACTCTATGAATAGTT  
CTTACTACAATTTTTGTCTAAAGAGTAATACTAGAGATAAACATAAAAAATGTAGAGGTGAGTTTA  
GATGCAAGTTCAAGGAGCGAAAGGTGGATGGGTAGGTTATATAGGGATATAGCACAGAGATATATAG  
CAAAGAGATACTTTGAGCAATGTTTGTGGAAGCGGTATTCGCAATATTTTAGTAGCTCGTTACAGTC  
CGGTGCGTTTTGGTTTTTAAAAGTGCCTTCAGAGCGTTTTGGTTTTCAAAGCGCTCTGAAGT  
TCCTATACTTTCTAGAGAATAGGAACCTCGGAATAGGAACCTCAAAGCGTTTTCCGAAAACGAGCGCTT  
CCGAAAATGCAACGCGAGCTGCGCACATACAGCTCACTGTTACGTCGCACCTATATCTGCGTGTG  
CCTGTATATATATACATGAGAAGAACGGCATAGTGCCTGTTTATGCTTAAATGCGTACTTATATGC  
GTCTATTTATGTAGGATGAAAGGTAGTCTAGTACCTCCTGTGATATTATCCCATTCATGCGGGGTAT  
CGTATGCTTCCCTCAGCACTACCCTTAGCTGTTCTATATGCTGCCACTCCTCAATTGGATTAGTCTC  
ATCCTTCAATGCTATCATTTCCCTTTGATATTGGATCATACTAAGAAACCATTATTATCATGACATTAAC  
TATAAAAATAGGCGTATCACGAGGCCCTTTCTGCTCGCGCGTTTTGGTGATGACGGTGAAAACCTCT  
GACACATGCAGCTCCCGGAGACGGTCACAGCTTGTCTGTAAGCGGATGCCGGGAGCAGACAAGCC  
CGTCAGGGCGCGTCAGCGGGTGTGGCGGGTGTGCGGGCTGGCTTAACTATGCGGCATCAGAGCA  
GATTGTACTGAGAGTGCACCATAACCACAGCTTTTCAATTCATTCATTTTTTTTTTATTCTTTTTTT  
TGATTTCCGTTTTCTTGAATTTTTTGAATTCGGTAATCTCCGAACAGAAGGAAGAACGAAGGAAGGA  
GCACAGACTTAGATTGGTATATATACGCATATGTAGTGTGAAGAAACATGAAATTGCCAGTATTCT  
TAACCCAAGTGCACAGAACAAAACCTGCAGGAAACGAAGATAAATCATGTGCAAAGCTACATATAA  
GGAACGTGCTGCTACTCATCTAGTCTGTTGCTGCCAAGCTATTTAATATCATGCACGAAAAGCAA  
CAAACCTGTGTGCTTCATTGGATGTTTCGTACCACCAAGGAATTACTGGAGTTAGTTGAAGCATTAGGT  
CCCAAATTTGTTTACTAAAAACACATGTGGATATCTTACTGATTTTTCCATGGAGGGCACAGTTAA  
GCCGCTAAAGGCATTATCCGCCAAGTACAATTTTTACTCTTCCGAAGACAGAAAATTTGCTGACATTG  
GTAATACAGTCAAATTGCAGTACTCTGCGGGTGTATACAGAATAGCAGAATGGGCAGACATTACGAA  
TGCACACGGTGTGGTGGGCCAGGTATTGTTAGCGGTTTGAAGCAGGCGGCAGAGAAGTAACAAA  
GGAACCTAGAGGCCTTTTGATGTTAGCAGAATTGTCATGCAAGGGCTCCCTATCTACTGGAGAATAT  
ACTAAGGGTACTGTTGACATTGCGAAGAGCGACAAAGATTTTGTATCGGCTTTATTGCTCAAAGAGA  
CATGGGTGGAAGAGATGAAGGTTACGATTGGTTGATTATGACACCCGGTGTGGGTTTAGATGACAAG  
GGAGACGCATTGGTCAACAGTATAGAACCGTGGATGATGTGGTCTACAGGATCTGACATTATTA  
TTGTTGGAAGAGGACTATTTGCAAAGGGAAGGGATGCTAAGGTAGAGGGTGAACGTTACAGAAAAG  
CAGGCTGGGAAGCATAATTTGAGAAGATGCGGCCAGCAAACAGTTACGCTAGGGATAACAGGGTAA  
TATAGCGTAACTATAACGCTCCTAAGAATTCCTAGCGGATCCCCCGGGTTCGACATAACCAAACCTA  
TTAAACACTTCTGATATTCTTAGTTCAAATATCAGAAGTGTTTTATAGTGTATCTAGTTTCAGATAAAT  
ATTTCTTACTTAAAAAACGCCCTCCTCTTATTTTTGACCCCTATTTATTTAAATCAGACAATTATTTTC  
ATTTCAAATTATTCTTTCTTCAATATTAGTTAAGCGATATTTAAACGAAGTTAAGAATTAGTTAATGGC  
ATATTATTTGCCTTCATTTTAACTTAACTTATCAAATTACGCGTTTATAAGGAGGAAAACATATGGC  
ATCATTCCAGTCTTTCCGTATACCAGGCCAATTAGAGGTTATCAAGAAGGCGTTAGATCATGTACGTG  
TTGGAGTTGTAATTACTGATCCTGCATTAGAGGACAACCCTATCGTGTATGTTAATCAGGGATTTGTG  
CAGATGACTGGATACGAGACGGAAGAGATCTTAGGCAAGAACGCTCGTTTTCTTGAAGGAAAACACA  
CAGACCCGGCAGAAAGTCGATAATATAAGAACGGCTTTACAGAATAAGGAGCCGTTACGGTTCAAAT  
CCAGAACTATAAAAAGGATGGAACATGTTTTGGAATGAGTTGAACATAGACCCGATGGAATAGAG  
GACAAAACGTACTTTGTAGGCATCCAAAACGATATTACAAAACAAAAGGAGTACGAGAAGTTGTTGGA  
GTAGGCGGCCGCTCGTAATCATGGTCATAGCTGTTTCTGTGTGAAATTGTTATCCGCTCACAATTC  
CACACAACATACGAGCCGGAAGCATAAAGTGTAAGCCTGGGGTGCCTAATGAGTGAGCTAACTCA  
CATTAAATTGCGTTGCGCTCACTGCCCGCTTTCCAGTCGGGAAACCTGTCTGTGCCAGCTGCATTAATG  
AATCGGCCAACGCGCGGGGAGAGGCGGTTTTGCGTATTGGGCGCTCTTCCGTTCTCCTCGCTCACTGA  
CTCGCTGCGCTCGGTGCTTCCGGTGCGGCGAGCGGTATCAGCTCACTCAAAGGCGGTAATACGGTT

ATCCACAGAATCAGGGGATAACGCAGGAAAGAACATGTGAGCAAAAGGCCAGCAAAAGGCCAGGAA  
CCGTAAAAAGGCCGCGTTGCTGGCGTTTTTTCATAGGCTCCGCCCCCTGACGAGCATCACAAAAAT  
CGACGCTCAAGTCAGAGGTGGCGAAACCCGACAGGACTATAAAGATACCAGGCGTTTCCCCCTGGA  
AGCTCCCTCGTGCGCTCTCCTGTTCCGACCCTGCCGCTTACCGGATACCTGTCCGCCTTTCTCCCTT  
CGGGAAGCGTGCGCTTTCTCATAGCTCACGCTGTAGGTATCTCAGTTCGGTGTAGGTCGTTGCT  
CCAAGCTGGGCTGTGTGCACGAACCCCCGTTACAGCCGACCGCTGCGCCTTATCCGGTAACTATC  
GTCTTGAGTCCAACCCGGTAAGACACGACTTATCGCCACTGGCAGCAGCCACTGGTAAACAGGATTA  
GCAGAGCGAGGTATGTAGGCGGTGCTACAGAGTTCCTGAAGTGGTGGCCTAACTACGGCTACTA  
GAAGGACAGTATTTGGTATCTGCGCTCTGCTGAAGCCAGTTACCTTCGGAAAAAGAGTTGGTAGCTC  
TTGATCCGGCAAACAAACCACCGCTGGTAGCGGTGGTTTTTTGTTTGCAAGCAGCAGATTACGCGC  
AGAAAAAAGGATCTCAAGAAGATCCTTTGATCTTTTCTACGGGGTCTGACGCTCAGTGGAAACGAAA  
ACTCACGTTAAGGGATTTTGGTCATGAGATTATCAAAAAGGATCTTACCTAGATCCTTTTAAATTTAA  
AATGAAGTTTTAAATCAATCTAAAGTATATATGAGTAACTTGGTCTGACAGTTACCAATGCTTAATCA  
GTGAGGCACCTATCTCAGCGATCTGTCTATTTCTGTTTCCATAGTTGCCTGACTCCCCGTCGTGTA  
GATAACTACGATACGGGAGGGCTTACCATCTGGCCCCAGTGTGCAATGATACCCGAGACCCACG  
CTCACCGGCTCCAGATTTATCAGCAATAAACCCAGCCAGCCGGAAGGGCCGAGCGCAGAAGTGGTCC  
TGCAACTTTATCCGCCTCCATCCAGTCTATTAATTGTTGCCGGGAAGCTAGAGTAAGTAGTTCCGCA  
GTTAATAGTTTTGCGCAACGTTGTTGCCATTGCTACAGGCATCGTGGTGTACGCTCGTCTTTGTA  
TGGCTTCATTACAGCTCCGGTCCCAACGATCAAGGCGAGTTACATGATCCCCATGTTGTGCAAAAA  
AGCGGTTAGCTCCTTCGGTCCCTCCGATCGTTGTGAGAAGTAAGTTGGCCGCAGTGTTATCACTCATG  
GTTATGGCAGCACTGCATAATTCTCTTACTGTCATGCCATCCGTAAGATGCTTTTTCTGTGACTGGTGA  
GTACTCAACCAAGTCATTCTGAGAATAGTGTATGCGGCGACCGAGTTGCTCTTGCCGGCGTCAATA  
CGGGATAATACCGCGCCACATAGCAGAACTTTAAAAGTGCTCATCATTGAAAACGTTCTTCGGGGC  
GAAAACCTCAAGGATCTTACCGCTGTTGAGATCCAGTTCGATGTAACCCACTCGTGCACCCAACTG  
ATCTTCAGCATCTTTTACTTTACCAGCGTTTCTGGGTGAGCAAAAACAGGAAGGCAAAAATGCCGCA  
AAAAAGGGAATAAGGGCGACACGGAAATGTTGAATACTCATACTCTTCTTTTCAATATTATTGAAG  
CATTTATCAGGGTTATTGTCTCATGAGCGGATACATAATTTGAATGTATTTAGAAAAATAACAATAGG  
GGTCCGCGCACATTTCCCGAAAAGTGCCACCTGACGTCTAAGAAACCATTATTATCATGACATTA  
CCTATAAAAATAGGCGTATCACGAGGCCCTTTTCGTCTCGCGCGTTTCGGTGATGACGGTGAAAACCT  
CTGACACATGCAGCTCCCGGAGACGGTCCAGCTTGTCTGTAAGCGGATGCCGGGAGCAGACAAG  
CCCGTCAGGGCGCGTCAGCGGGTGTGGCGGGTGTGCGGGGCTGGCTTAACTATGCGGCATCAGAG  
CAGATTGTAAGTGCACCATATGCGGTGTGAAATACCGCACAGATGCGTAAGGAGAAAATACC  
GCATCAGGCGCCATTCGCCATTCAGGCTGCGCAACTGTTGGGAAGGGCGATCGGTGCGGGCCTCT  
TCGCTATTACGCCAGCTGGCGAAAGGGGGATGTGCTGCAAGGCGATTAAGTTGGGTAACGCCAGGG  
TTTTCCAGTCACGACGTTGTAACGACGGCCAGTGCCAAGCTTTTAAAAGCAAATATGAGCCAA  
ATAAATATATTCTAATTCTACAAACAAAAATTTGAGCAAATTCAGTGTGATTTTTTAAGCACTGCC  
AGTTACATGCAAATTAATTTTTCATGATTTTTATAGTTTCTAACAGGGTAAAATTTGTATAACGAAA  
GTATAATGTTTATATAACGTTAGTATAATAAAGCATTTTAAACATTACTTTTTGATAATCGTTTATCGTC  
GTCATCACAATAACTTTTTAAATACTCGTGCATAATTCACGCTGACCTCCAATAACTACATGGTGTA  
TCGGGAGGTACGCTGTTAGCACTTATTTTTGTTATTGTTCTTCTCGATTTCTGTCTATCATTTTTGTGA  
TTAATTTCTTTTTTTCTGTTGTTCTGTTAAGTCATAAAGTTCACACTAGCTAAATACTTTTTTTCCAAAT  
ATAAAAAATTTGATAGATATATTACGGTTGGATCAATTTCTTTTAAAGTAATCTAAATCCCCATTTTTTAA  
TTTTTTTTAGCCTCTTTAAATAATCCTGAATAAACTAATACCTGTTTACCTTTAAGTGATTTATAAAAT  
GCATCAAAGACTTTTTGATTTATTTATTAATAATCACTATCTTTACCAGAATACTTAGCCATTTTCATAT  
AATTTTATTATTATTTTGTCTTATTTTTTGAACCTGAACCTGTGTTATTTCTGAAATGCCCGTTACATC  
ACGCCATAAATCTAACCATTCTTGTGGCTAATAATAATCTTTTTATCTGTGAAATACGATTTATTTACT  
GCAATTAACACATGAAAATGAGGATTATAATCATCTCTTTTTTTATTATATGTAATCTCTAACTTACGAA  
CATATCCCTTTATAAACTACCTACTTTTTTTCTCTTTATAAGTTTTCTAAAAGAATTATTATAACGTTTT  
ATTTCAATTTCTAATTCATCACTCATTACATTAGGTGTAGTCAAAGTTAAAAGATAAACTCCTTTTTCT  
CTTGCTGCTTAATATATTGCATCATCAAAGATAAACCCAATGCATCTTTTCTAGCTTTTCTCCAAGCAC  
AGACAGGACAAAATCGATTTTTACAAGAATTAGCTTTATATAATTTCTGTTTTTCTAAAGTTTTATCAGC  
TACAAAAGACAGAAATGTATTGCAATCTTCAACTAAATCCATTTGATTCTCTCCAATATGACGTTTAAAT  
AAATTTCTGAAATACTTGATTTCTTTGTTTTTCTCAGTATACTTTTCCATGTTATAACACATAAAAAACA  
CTTAGTTTTTCAAACTATGACAATAAAAAAAGTTGCTTTTTCCCTTTCTATGTATTTTTTTACTAGT  
CATTTAAAACGATACATTAATAGGTACGAAAAGCAACTTTTTTTGCGCTTAAAACCAGTCATACCAAT  
AACTTAAGGGTAACTAGCCTCGCCGGCAATAGTTACCCTTATTATCAAGATAAGAAAGAAAAGGATTT

TTCGCTACGCTCAAATCCTTTAAAAAACACAAAAGACCACATTTTTAATGTGGTCTTTATTCTTCAA  
CTAAAGCACCCATTAGTTCAACAAACGAAAATTGGATAAAGTGGGATATTTTTAAATATATATTTATG  
TTACAGTAATATTGACTTTTAAAAAAGGATTGATTCTAATGAAGAAAGCAGACAAGTAAGCCTCCTAAA  
TTCACCTTTAGATAAAAAATTTAGGAGGCATATCAAATGAACTTTAATAAAATTGATTTAGACAATTGGAA  
GAGAAAAGAGATATTTAATCATTATTTGAACCAACAAACGACTTTTAGTATAACCACAGAAATTGATAT  
TAGTGTTTTATACCGAAACATAAAACAAGAAGGATATAAATTTACCCTGCATTTATTTCTTAGTGAC  
AAGGGTGATAAACTCAAATACAGCTTTTAGAAGTGGTTACAATAGCGACGGAGAGTTAGGTTATTGG  
GATAAGTTAGAGCCACTTTATACAATTTTTGATGGTGTATCTAAAACATTCTCTGGTATTTGGACTCCT  
GTAAAGAATGACTTCAAAGAGTTTTATGATTTATACCTTTCTGATGTAGAGAAATATAATGGTTCGGGG  
AAATTGTTTCCAAAACACCTATACCTGAAAATGCTTTTTCTCTTTCTATTATTCCATGGACTTCATTTA  
CTGGGTTTAACTTAAATATCAATAATAATAGTAATTACCTTCTACCCATTATTACAGCAGGAAAATTCAT  
TAATAAAGGTAATTCAATATATTTACCGCTATCTTTACAGGTACATCATTCTGTTTGTGATGGTTATCAT  
GCAGGATTGTTTATGAACTCTATTCAGGAATTGTCAGATAGGCCTAATGACTGGCTTTTATAATATGA  
GATAATGCCGACTGTACTTTTTACAGTCGGTTTTCTAATGTCACTAACCTGCCCGTTAGTTGAAGAA  
GGTTTTTATATTACAGCTCCAGATCCATATCCTTCTTTTTCTGAACCGACTTCTCCTTTTTCGCTTCTTT  
ATTCCAATTGCTTTATTGACGTTGAGCCTCGGAACCTTAAACAATCCCAAAACTTGTGCAATGGTCGG  
CTTAATAGCTCACGCTATGCCGACATTCGTCTGCAAGTTTAGTTAAGGGTTCTTCTCAACGCACAATA  
AATTTTCTCGGCATAAATGCGTGGTCTAATTTTTATTTTTAATAACCTTGATAGCAAAAAATGCCATTC  
CAATACAAAACCACATACCTATAATCGATAACCACATAACAGTCATAAAACCACTCCTTTTTAACAAAC  
TTTATCACAAGAAATATTTAAATTTTAAATGCCTTTATTTTGAATTTTAAAGGGGCATTTTAAAGATTTAG  
GGTAAATCATATAGTTTTATGCCTAAAACCTACAGAAGCTTGCATGCCTGCAG

---

**pJB38\_P1sae\_sodM RBS\_hla**

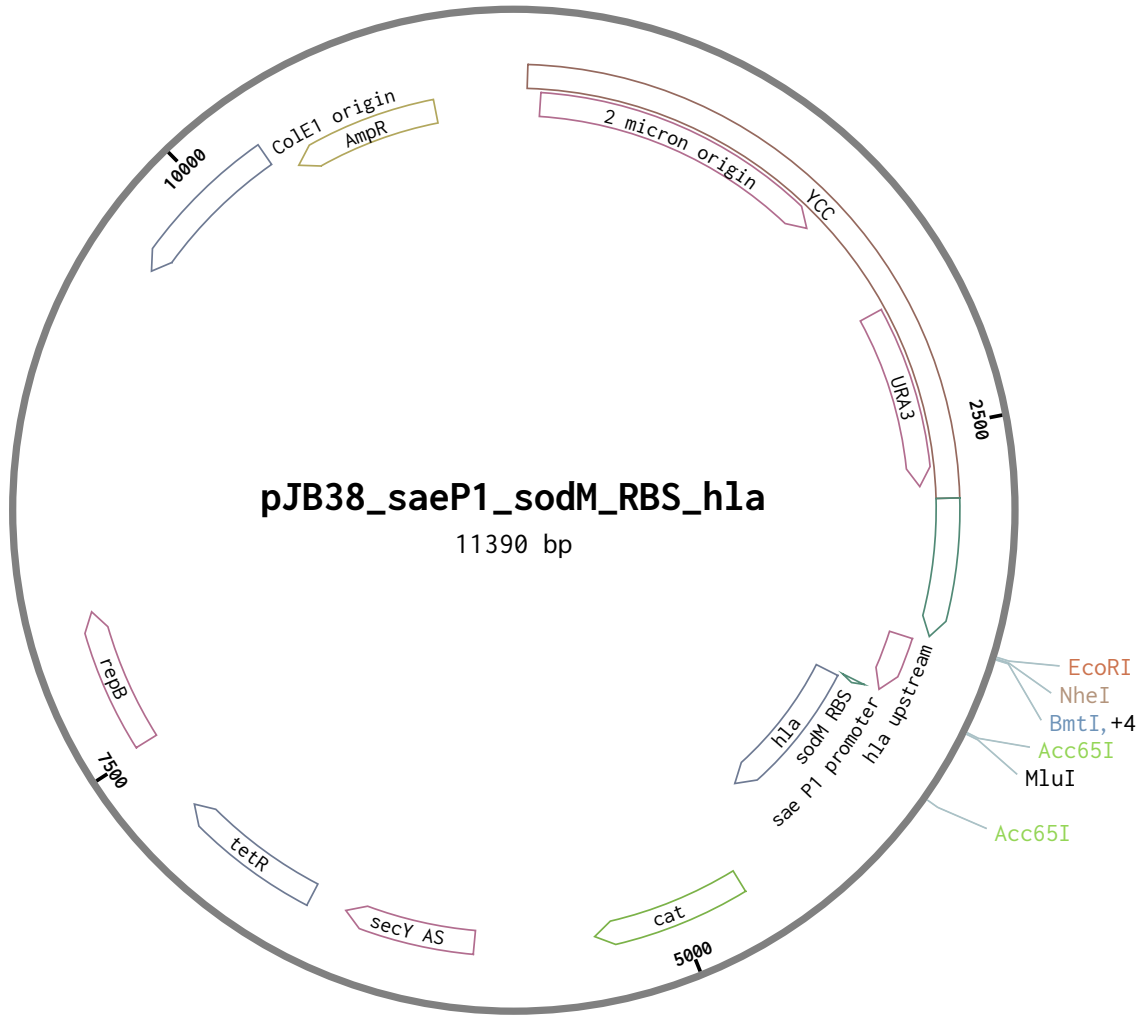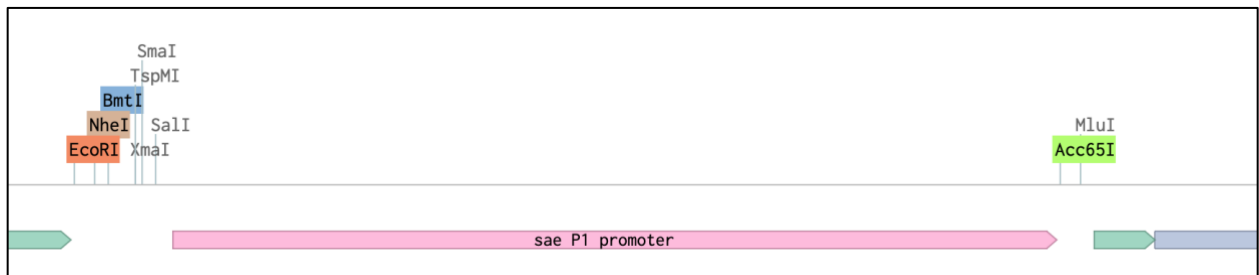

TCATGACATTAACCTATAAAAAATAGGCGTATCACGAGGCCCTTTTCGTCTTCAAGAATTGGTGGCACTT  
 TTCGGGGAAAAGTTACGCTAGGGATAACAGGGTAATATAGCACCTGAACGAAGCATCTGTGCTTCAT  
 TTTGTAGAACAAAAATGCAACGCGAGAGCGCTAATTTTTCAAACAAGAATCTGAGCTGCATTTTTAC  
 AGAACAGAAATGCAACGCGAAAGCGCTATTTTACCAACGAAGAATCTGTGCTTCATTTTTGTAAAACA  
 AAAATGCAACGCGAGAGCGCTAATTTTTCAAACAAGAATCTGAGCTGCATTTTTACAGAACAGAAAT  
 GCAACGCGAGAGCGCTAATTTTACCAACAAGAATCTAATCTCTTTTTTTGTTCTACAAAAATGCATCCC  
 GAGAGCGCTATTTTTCTAACAAAGCATCTTAGATTACTTTTTTCTCCTTTGTGCGCTCTATAATGCAG  
 TCTCTTGATAACTTTTTGCACTGTAGGTCCGTTAAGGTTAGAAGAAGGCTACTTTGGTGTCTATTTTCT  
 CTTCCATAAAAAAAGCCTGACTCCACTTCCCGCGTTTACTGATTACTAGCGAAGCTGCGGGTGCATTT



GCAAGTTCTCTATTATCTTCAGGGTTTTCCACCAGACTCGACCTGCAGGCATGCAAGCTCTGATTTAC  
TTTTTGCATTCTACAAACTGCATAACTCATATGTAATCGCTCCTTTTTAGGTGGCACAAATGTGAGGC  
ATTTTCGCTCTTTCCGGCGAGGCTAGTTACCTTAAGTTATTGGTATGACTGGTTTTAAGCGCAAAA  
AAGTTGCTTTTTTCGTACCTATTAATGTATCGTTAGAAAACCGACTGTAAAAAGTACAGTCGGCATTATC  
TCATATTATAAAAGCCAGTCATTAGGCCTATCTGACAATTCCTGAATAGAGTTCATAACAATCCTGCA  
TGATAACCATCACAAACAGAATGATGTACCTGTAAAGATAGCGGTAAATATATTGAATTACCTTTATTA  
ATGAATTTTCTGCTGTAATAATGGGTAGAAGGTAATTACTATTATTGATATTTAAGTTAAACCCA  
GTAAATGAAGTCCATGGAATAATAGAAAGAGAAAAAGCATTTTCAGGTATAGGTGTTTTGGGAAACAA  
TTTCCCGAACCATTATTTTCTCTACATCAGAAAGGTATAAATCATAAAACCTTTTGAAGTCATTCTTT  
ACAGGAGTCCAAATACCAGAGAATGTTTTAGATACCCATCAAAAATTGTATAAAGTGGCTCTAECTT  
ATCCCAATAACCTAACTCTCCGTGCTATTGTAACCAGTTCTAAAAGCTGATTTGAGTTTATCACCT  
TGTCATAAGAAAATAAATGCAGGGTAAATTTATATCCTTCTTGTTTTATGTTTCGGTATAAAACACT  
AATATCAATTTCTGTGGTTATACTAAAAGTCGTTTGTGGTTCAAATAATGATTAATATCTCTTTTCTC  
TTCCAATTGTCTAAATCAATTTTATTAAGTTCAATTTGATATGCCTCCTAAATTTTATCTAAAGTGAATT  
TAGGAGGCTTACTTGTCTGCTTTTCTTATTAGAATCAATCCTTTTTTAAAAGTCAATATTACTGTAACAT  
AAATATATATTTTAAAAATATCCCACCTTATCCAATTTTCGTTTTGTTGAACTAATGGGTGCTTTAGTTGA  
AGAATAAAGACCACATTAATAAATGTGGTCTTTTGTGTTTTTTTTAAAGGATTTGAGCGTAGCGAAAAAT  
CCTTTTCTTTCTTATCTTGATAATAAGGGTAACTATTGCCGGGATAGACTGTAACATTCTCACGCATAA  
AATCCCTTTTCATTTTCTAATGTAAATCTATTACCTTATTATTAATTCAATTCGCTCATAATTAATCCTTT  
TTCTTATTACGCAAAATGGCCCGATTTAAGCACACCCTTTATTCCGTTAATGCGCCATGACAGCCATG  
ATAATTAATAACTAGGAGAAGTTAATAAATACGGGTGATCTAATGATTCAATGATTCAAACCTTGT  
GAACTTCTTTAGAACAAGAGGTTCTGTAACAAGATTTTCTTACACTAGCAATGTTAGTAATTTTTAA  
AATAGGGACTTATATACCAGCTCCAGGAGTAAATCCTGCAGCTTTTGATAATCCCAAGGTTCTCAAG  
GTGCCACTGAGTTATTAATACTTTTGGTGGCGGAGCCTTGAACGATTTTCTATTTTTGCAATGGGT  
ATTGTACCCTACATCACTGCATCAATCGTAATGCAATTATTACAAATGGATATTGTCCCTAAATTCTCA  
GAATGGGCAAAACAAGGTGAAGTAGGTAGAAGAAAGTTAAATAACGTTACTCGTTATTTAGCAATTTT  
TTTAGCATTTATCCAATCTATAGGTATGGCATTCCAATTTAATAATTATCTCAAAGGTGCGCTGATTAT  
CAATCAGTCAATTATGAGTTATTTATTAATAGCACTAGTTTTGACAGCAGGAACTGCTTTCTTAATATG  
GCTTGGTGATCAATCACTCAGTTCCGGTGTGGTAATGGTATTTCTATTATCATATTCCCATCAAGCTT  
ATTTAATTATACTCTATCAATGATAGAGTGTCAATATTTTTTTAGTTTTTCATGAACTCGATCGAGGG  
GATCCAAATAAAAAACTAGTTTGACAAATAACTCTATCAATGATAGAGTGTCAACAAAAAGGAGGAAT  
TAATGATGTCTAGATTAGATAAAAGTAAAGTGATTAACAGCGCATTAGAGCTGCTTAATGAGGTCCGA  
ATCGAAGGTTTAAACAACCCGTAAACTCGCCAGAAGCTAGGTGTAGAGCAGCCTACATTGTATTGGC  
ATGTAAAAAATAAGCGGGCTTTGCTCGACGCCTTAGCCATTGAGATGTTAGATAGGCACCATACTCA  
CTTTTGCCCTTTAGAAGGGGAAAGCTGGCAAGATTTTTTACGTAATAACGCTAAAAGTTTTAGATGTG  
CTTTACTAAGTCATCGCGATGGAGCAAAAGTACATTTAGGTACACGGCCTACAGAAAAACAGTATGAA  
ACTCTCGAAAATCAATTAGCCTTTTTATGCCAACAAGTTTTTCACTAGAGAATGCATTATATGCACTC  
AGCGCTGTGGGGCATTTTACTTTAGGTTGCGTATTGGAAGATCAAGAGCATCAAGTCGCTAAAGAAG  
AAAGGGAAACACCTACTACTGATAGTATGCCGCCATTATTACGACAAGCTATCGAATTATTTGATCAC  
CAAGGTGCAGAGCCAGCCTTCTTATTCCGGCCTTGAATTTGATCATATGCGGATTAGAAAAACAACCTAA  
ATGTGAAAGTGGGTCTTAAAAGCAGCATAACCTTTTTCCGTGATGGTAACTTCACGGTAACCAAGATA  
ACAAAGAATACAAGAAAAATTTACAAAAAATCAATTTAACAATTCCTTAAAACATGCAGGAATTGACG  
ATTTAAACAATATTAGCTTTGAACAATTCTTATCTCTTTTCAATAGCTATAAATTATTTAATAAGTAAGT  
AAGGGATGCATAAACTGCATCCCCTAACTTGTTTTTCGTGTGCCTATTTTTTGTGAATCGATTATGTCT  
TTTGCAGTCGGCTTAAACCAGTTTTCGCTGGTGCGAAAAAAGAGTGTCTTGTGACACCTAAATTCA  
AAATCTATCGGTGAGATTTATACCGATTTGATTTTATATATTCTTGAATAACATACGCCGAGTTATCAC  
ATAAAAGCGGGAACCAATCATCAAATTTAACTTTCATTGCATAATCCATTAACCTCTTAAATTCTACGA  
TTCTTGTTCATCAATAAACTCAATCTTTTAAATTTATATCTATCTGTTGTTGTTTTCTTTAAT  
AATTCATCAACATCTACACCGCCATAAACTATCATATCTTCTTTTTGATATTTAAATTTATTAGGATCGT  
CCATGTGAAGCATATATCTCACAAGACCTTTACACTTCTGCAATCTGCGGAATAGTCGCATTCAAT  
TCTTCTGTAATTTTTTATCTGTTTATAAGATTTATTACCCTCATACATCACTAGAATATGATAATGCT  
CTTTTTTTCATCCTATCTTCTGTATCAGTATCCCTATCATGTAATGGAGACACTACAAATTGAATGTGTA  
ACTCTTTTAAATACTCTAACCCTCGGCTTTTGTGATTCTGGATATAAAACAATGTCCAATTACGTC  
CTCTTGAATTTTTCTTGTTCAGTTTTTATTACATTTTCGCTCATGATATAATAACGGTGCTAATA  
CATTTAACAATTTAGTCATAGATAGGCAGCATGCCAGTGCTGTCTATTTTTTTTTGTTTAAATGCA  
CCGATTCTCCTTTGCATATTTTTTTATTAGAATACCGGTTGCATCTGATTTGCTAATATTATTTTT

CTTTGATTCTATTTAATATCTCATTTTTCTTCTGTTGTAAGTCTTAAAGTAACAGCAACTTTTTTCTCTTCT  
TTTTCTATCTACAACCATCACTGTACCTCCCAACATCTGTTTTTTTCACTTTAACATAAAAAACAACCTTT  
TAACATTA AAAACCCAATATTTATTTATTTGTTTGGACAATGGACAATGGACACCTAGGGGGGAGGTC  
GTAGTACCCCTATGTTTTCTCCCCTAAATAACCCCAAAAATCTAAGAAAAAAGACCTCAAAAAGG  
TCTTTAATTAACATCTCAAATTTGCGATTTATTCCAATTTCTTTTTGCGTGTGATGCGCTGCGTCCAT  
TAAAAATCCTAGAGCTTTGCAACCGAAAGTTAATAGCTGTGCTACTACTTTTTCGCTTACGCTCTAAGT  
ATATTTTAAGGACTGTCACACGCAAAAAGTTTTCTCGGCATAAAAAGTACCTCTACATCTCTAAATCGTC  
TGACGCTGTTTCTCACGCTTTCTATCGACCTTCTGGACATTATCCTGTACAACATCCATAAACTGTC  
CCACACGCTCGAATTTGGAATCATTAAAGAATTTCTCTTTAAGCCTATTAACCCTTTCTCAAACCCAG  
GGAAATTCGCCCTCGCAGCACGATATAAAGTCACTGTACTATCTTGAAATTTCTCTGATACATTCAAC  
TGCTCATTCAAACATCATTCTCTCGCTTTAATTTATTAACCTCTTACTTTTTTCGTGATACCCCTCTT  
TCCATGTATTCACTACTTCTTTCAAACCTCTCTACGTTTTTTTTAATTCTTGATTTTCTGTGTAATAGTC  
TGTGCTCTTAATATTTTCGTAATCATCAACAATCCGTTCTGCCTCGCGCGTTTTCGGTGATGACGGTG  
AAAACCTCTGACACATGCAGCTCCCGGAGACGGTCACAGCTTGTCTGTAAGCGGATGCCGGGAGCA  
GACAAGCCCGTCAGGGCGCGTCAGCGGGTGTGGCGGGTGTGCGGGCGCAGCCATGACCCAGTC  
ACGTAGCGATAGCGGAGTGTATACTGGCTTAACATGCGGCATCAGAGCAGATTGTACTGAGAGTGC  
ACCATATGCGGTGTGAAATACCGCACAGATGCGTAAGGAGAAAATACCGCATCAGGCGCTCTTCCG  
CTTCTCGCTCACTGACTCGCTGCGCTCGGTCTGCTCGGCTGCGGCGAGCGGTATCAGCTCACTCAA  
AGGCGGTAATACGGTTATCCACAGAATCAGGGGATAACGCAGGAAAGAACATGTGAGCAAAAAGGCC  
AGCAAAAGGCCAGGAACCGTAAAAAGGCCGCGTTGCTGGCGTTTTTCCATAGGCTCCGCCCCCTG  
ACGAGCATCACA AAAATCGACGCTCAAGTCAGAGGTGGCGAAACCCGACAGGACTATAAAGATACC  
AGGCGTTTTCCCTGGAAGCTCCCTCGTGCCTCTCCTGTTCCGACCCTGCCGCTTACCGGATACC  
TGTCCGCCTTTCTCCCTTCGGGAAGCGTGGCGTTTTCTCATAGCTCACGCTGTAGGTATCTCAGTTC  
GGTGTAGGTCGTTGCTCCAAGCTGGGCTGTGTGCACGAACCCCGTTCAGCCCGACCGCTGCG  
CCTTATCCGGTAACATCGTCTTGAGTCCAACCCGGTAAGACACGACTTATCGCCACTGGCAGCAGC  
CACTGGTAACAGGATTAGCAGAGCGAGGTATGTAGGCGGTGCTACAGAGTTCTTGAAGTGGTGGCC  
TAACTACGGCTACACTAGAAGGACAGTATTTGGTATCTGCGCTCTGCTGAAGCCAGTTACCTTCGGA  
AAAAGAGTTGGTAGCTCTTGATCCGGCAAACAACCCAGGCTGGTAGCGGTGGTTTTTTTGTGTTGCA  
AGCAGCAGATTACGCGCAGAAAAAAGGATCTCAAGAAGATCCTTTGATCTTTTCTACGGGGTCTGA  
CGCTCAGTGGAACGAAAACCTCACGTTAAGGGATTTTGGTCATGAGATTATCAAAAAGGATCTTCACCT  
AGATCCTTTTAAATTA AAAATGAAGTTTTAAATCAATCTAAAGTATATATGAGTAAACTTGGTCTGACA  
GTTACCAATGCTTAATCAGTGAGGCACCTATCTCAGCGATCTGTCTATTTTCGTTTCATCCATAGTTGCC  
TGACTCCCGTTCGTGTAGATAACTACGATACGGGAGGGCTTACCATCTGGCCCCAGTGCTGCAATG  
ATACCGCGAGACCCACGCTCACCGGCTCCAGATTTATCAGCAATAAACCAGCCAGCCGGAAGGGCC  
GAGCGCAGAAGTGGTCTGCAACTTTATCCGCCTCCATCCAGTCTATTAATTGTTGCCGGGAAGCTA  
GAGTAAGTAGTTCGCCAGTTAATAGTTTGCACAACGTTGTTGCCATTGCTGCAGGCATCGTGGTGTG  
ACGCTCGTCTTTGGTATGGCTTCATTACGCTCCGGTTCCCAACGATCAAGGCGAGTTACATGATCC  
CCCATGTTGTGCAAAAAGCGGTTAGCTCCTTCCGTCCTCCGATCGTTGTCAGAAGTAAGTTGGCCG  
CAGTGTATCACTCATGGTTATGGCAGCACTGCATAATTCTTACTGTATGCCATCCGTAAGATGC  
TTTTCTGTGACTGGTACTCAACCAAGTCATTCTGAGAATAGTGTATGCGGCGACCGAGTTGCT  
CTTGCCCGCGTCAACACGGGATAAATACCGCGCCACATAGCAGAACTTTAAAAGTGCTCATCATTGG  
AAAACGTTCTTCGGGGCGAAAACCTCTCAAGGATCTTACCGCTGTTGAGATCCAGTTTCGATGTAACCC  
ACTCGTGCAACCAACTGATCTTACGATCTTTTACTTTTACCAGCGTTTTCTGGGTGAGCAAAAACAGG  
AAGGCAAAAATGCCGCAAAAAGGGAATAAGGGCGACACGGAAATGTTGAATACTCATACTTTCCTT  
TTTTCAATATTATTGAAGCATTATCAGGGTTATTGTCTCATGAGCGGATACATATTTGAATGTATTTAG  
AAAAATAACAATAGGGGTTCCGCGCACATTTCCCGAAAAGTGCCACCTGACGTCTAAGAAACCA  
TTATTA

---

**pJB38\_P1sae\_TIR RBS\_hla**

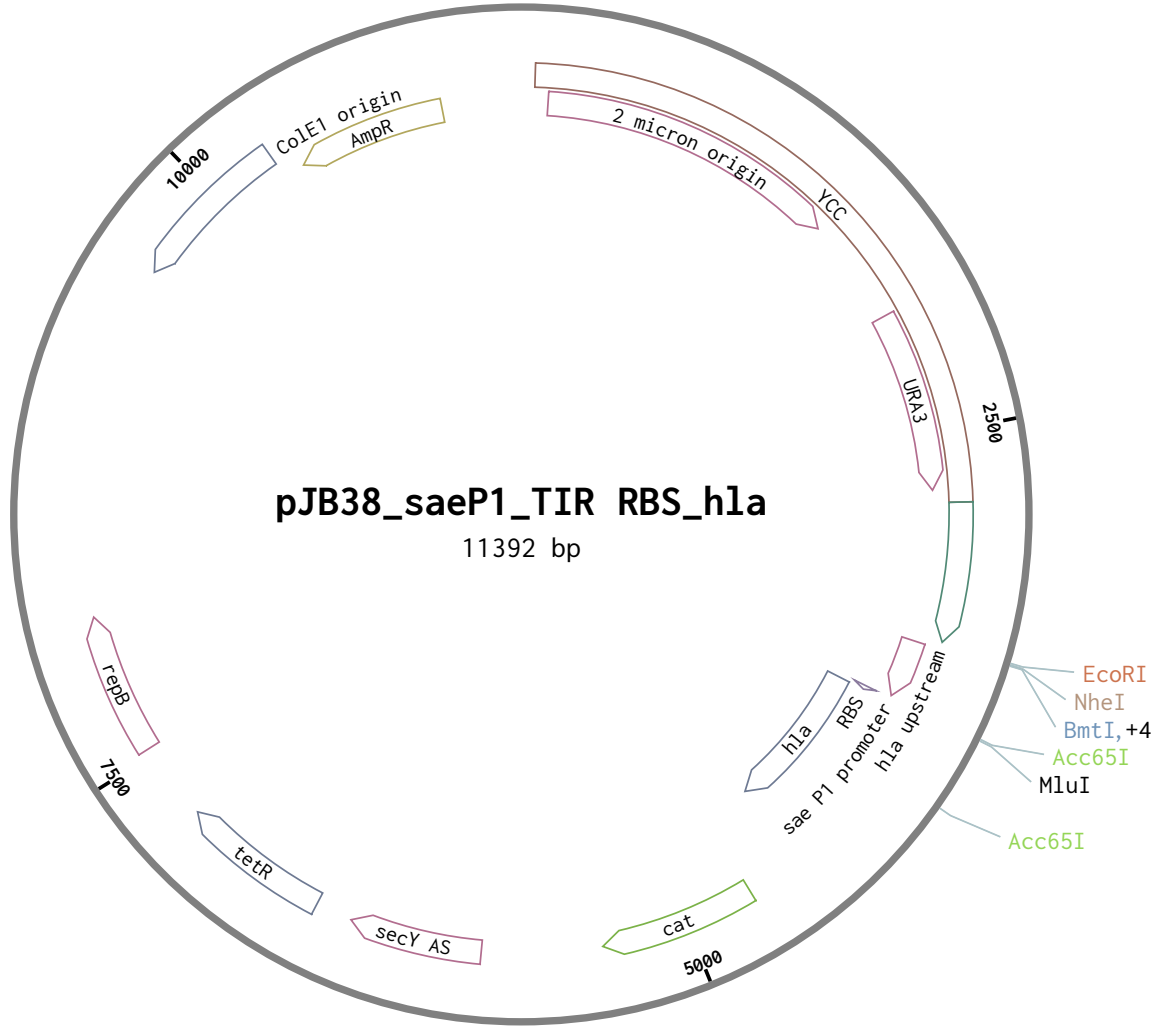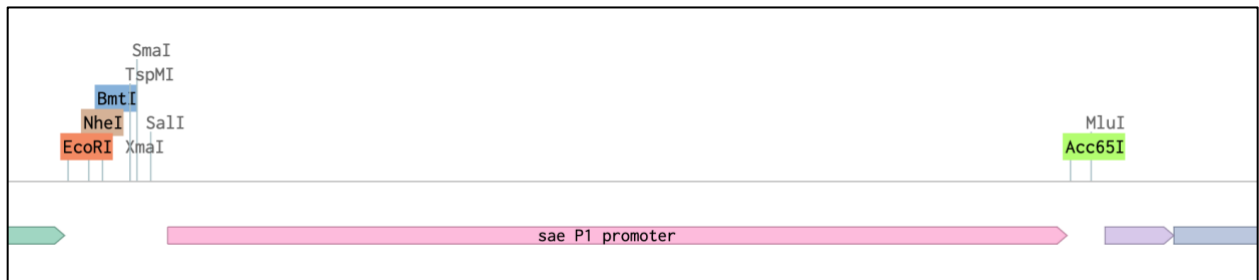

TCATGACATTAACCTATAAAAAATAGGCGTATCACGAGGCCCTTTTCGTCTTCAAGAATTGGTGGCACCTTTCGGGGAAAAGTTACGCTAGGGATAACAGGGTAATATAGCACCTGAACGAAGCATCTGTGCTTCATTTTGTAGAACAAAAATGCAACGCGAGAGCGCTAATTTTTTCAAACAAAGAATCTGAGCTGCATTTTTACAGAACAGAAATGCAACGCGAAAGCGCTATTTTACCAACGAAGAATCTGTGCTTCATTTTTGTAAAACAAAATGCAACGCGAGAGCGCTAATTTTTCAAACAAAGAATCTGAGCTGCATTTTTTACAGAACAGAAATGCAACGCGAGAGCGCTAATTTTACCAACAAAGAATCTATACTTCTTTTTTTGTTCTACAAAAATGCATCCCAGAGAGCGCTATTTTTCTAACAAAGCATCTTAGACTTTTTTTCTCCTTTGTGCGCTCTATAATGCAGTCTCTTGATAACTTTTTGCACTGTAGGTCCGTTAAGGTTAGAAGAAGGCTACTTTGGTGTCTATTTTCTCTTCATAAAAAAAGCCTGACTCCACTTCCCGCTTTACTGATTACTAGCGAAGCTGCGGGTGCATT



TTTCAAGATAAAGGCATCCCCGATTATATTCTATACCGATGTGGATTGCGCATACTTTGTGAACAGAA  
AGTGATAGCGTTGATGATTCTTCATTGGTCAGAAAATTATGAACGGTTTCTTCTATTTTTGTCTCTATAT  
ACTACGTATAGGAAATGTTTACATTTTCGTATTGTTTTCGATTCACTCTATGAATAGTTCTTACTACAAT  
TTTTTTGTCTAAAGAGTAATACTAGAGATAAACATAAAAAATGTAGAGGTGAGTTTATAGATGCAAGTTC  
AAGGAGCGAAAGGTGGATGGGTAGGTTATATAGGGATATAGCACAGAGATATATAGCAAAGAGATAC  
TTTTGAGCAATGTTTGTGGAAGCGGTATTCCGAATATTTTAGTAGCTCGTTACAGTCCGGTGCGTTTT  
TGGTTTTTTGAAAAGTGCCTCTTCAGAGCGCTTTTGGTTTTCAAAGCGCTCTGAAGTTCCTATACTTT  
CTAGAGAATAGGAACTTCGGAATAGGAACTTCAAAGCGTTTCCGAAAACGAGCGCTTCCGAAAATGC  
AACGCGAGCTGCGCACATACAGCTCACTGTTACAGTTCGCACCTATATCTGCGTGTTCCTGTATATA  
TATATACATGAGAAGAACGGCATAGTGCCTGTTTATGCTTAAATGCGTACTTATATGCGTCTATTTATG  
TAGGATGAAAGGTAGTCTAGTACCTCCTGTGATATTATCCCATTCCATGCGGGGTATCGTATGCTTCC  
TTCAGCACTACCCTTTAGCTGTTCTATATGCTGCCACTCCTCAATTGGATTAGTCTCATCCTTCAATGC  
TATCATTTCTTTGATATTGGATCATACTAAGAAACCATTATTATCATGACATTAACCTATAAAAAATAGG  
CGTATCACGAGGCCCTTTTCGTCTCGCGCGTTTTCGGTGATGACGGTGAAAACCTCTGACACATGCAG  
CTCCCGGAGACGGTACAGCTTGTCTGTAAGCGGATGCCGGGAGCAGACAAGCCCGTCAGGGCGC  
GTCAGCGGGTGTGGCGGGTGTGGGGCTGGCTTAACTATGCGGCATCAGAGCAGATTGTAAGTACTGAG  
AGTGCACCATACCACAGCTTTTCAATTCAATTCATCATTTTTTTTTTTTATTCTTTTTTTTTGATTTCCGGTTTC  
TTTGAAATTTTTTTGATTCGGTAATCTCCGAACAGAAGGAAGAACGAAGGAAGGAGCACAGACTTAGA  
TTGGTATATATACGCATATGTAGTGTTGAAGAAACATGAAATTGCCAGTATTCTTAAACCAACTGCA  
CAGAACAACCTGCAGGAAACGAAGATAAATCATGTCGAAAGCTACATATAAGGAACGTGCTGCT  
ACTCATCCTAGTCTGTTGCTGCCAAGCTATTTAATATCATGCACGAAAAGCAAACAACCTTGTGTGC  
TTCATTGGATGTTTCGTACCACCAAGGAATTACTGGAGTTAGTTGAAGCATTAGGTCCCAAAATTTGTT  
TACTAAAACACATGTGGATATCTTGACTGATTTTTCCATGGAGGGCACAGTTAAGCCGCTAAAGGCA  
TTATCCGCCAAGTACAATTTTTACTCTTCGAAGACAGAAAATTTGCTGACATTGGTAATACAGTCAAA  
TTGCAGTACTCTGCGGGTGTATACAGAATAGCAGAATGGGCAGACATTACGAATGCACACGGTGTG  
GTGGGCCAGGTATTGTTAGCGGTTTGAAGCAGGCGGCAGAAGAAGTAACAAAGGAACCTAGAGGC  
CTTTTGATGTTAGCAGAATTGTCATGCAAGGGCTCCCTATCTACTGGAGAATATACTAAGGGTACTGT  
TGACATTGCGAAGAGCGACAAAGATTTTGTATCGGCTTTATTGCTCAAAGAGACATGGGTGGAAGA  
GATGAAGGTTACGATTGTTGATTATGACACCCGGTGTGGTTTTAGATGACAAGGGAGACGCATTGG  
GTCAACAGTATAGAACCGTGGATGATGTGGTCTCTACAGGATCTGACATTATTATTGTTGGAAGAGG  
ACTATTTGCAAAGGGAAGGGATGCTAAGGTAGAGGGTGAACGTTACAGAAAAGCAGGCTGGGAAGC  
ATATTTGAGAAGATGCGGCCAGCAAACAGTTACGCTAGGGATAACAGGGTAATATAGCGTAACTAT  
AACGGTCCATAATGTGCTTACACACAGCCTCATTTCATTTCAAATAAATGGCTATATCAATATGATA  
ATGGAAACATTTATGTTGAACTTAAGAGATATTCATGGTCAGCACATATATCTTTATGGGGCGCTGAA  
AGTTGGGGAATATTAATCAGTTAAAAGATCGTTACGTAGATGTGTTTGGACTAAAAGACAAAGATAC  
TGATCAGTTATGGTGGTCTTATAGAGAGACATTTACAGGTGGCGTTACACCAGCCGCAAACCTTCT  
GATAAACTTATAATCTTTTTGTGCAATACAAAGATAAACTACAAACGATTATTGGTGCGCATAAAATA  
TACCAAGGCAATAAACCAGTATTAACATTGAAAGAAATCGATTTCCGTGCACGAGAAGCGTTAATAAA  
AAATAAAATATTATATAACGAAAATCGTAATAAAGGTAAGCTTAAAGATCACCAGTGGCGGTAATAACT  
ACACTATTGATTTAAGCAAAAAGATTACATTAGATCTAGCAAATGTTTATGTTAAAAAATCCTAATAAAAT  
AACTGTTGACGTCCTCTTTGATTAGTATATGAAGGTGACTTATACTTTCATGCACAGAATTCGCTAGCG  
GATCCCCCGGGTTCGACATACCAAACCTATTAACACTTCTGATATTCTTAGTTCAAATATCAGAAG  
TGTTTTATAGTGTTATCTAGTTCAGATAAATATTTCTTACTTAAAAAACGCCCTCCTCTTATTTTTGAC  
CCCTATTTATTTAAATCAGACAATTATTTTCATTTCAAATTAATCTTTCTTCAATATTAGTTAAGCGATA  
TTTAAACGAAGTTAAGAATTAGTTAATGGCATATTTTGCCTTCATTTTAACTTAACTTATCAAATTTG  
GTACCACGCGTTTATAAGGAGGAAAAACATATGAAAACACGTATAGTCAGCTCAGTAACAACAACACT  
ATTGCTAGGTTCCATATTAATGAATCCTGTGCTAATGCCGCAGATTCTGATATTAATATTAACCCGG  
TACTACAGATATTGGAAGCAATACTACAGTAAAAACAGGTGATTTAGTCACTTATGATAAAGAAAATG  
GCATGCACAAAAAAGTATTTTATAGTTTTATCGATGATAAAAATCATAAATAAAAAACTGCTAGTTATTAG  
AACGAAAGGTACCATTGCTGGTCAATATAGAGTTTATAGCGAAGAAGGTGCTAACAAAAGTGGTTTA  
GCCTGGCCTTCAGCCTTTAAGGTACAGTTGCAACTACCTGATAATGAAGTAGCTCAAATATCTGATTA  
CTATCCAAGAAATTCGATTGATACAAAAGAGTATATGAGTACTTAACTTATGGATTCAACGGTAATGT  
TACTGGTGTGATACAGGAAAAATTGGCGGCCTTATTGGTGCAAATGTTTCGATTGGTCATACACTGA  
AATATGTTCAACCTGATTTCAAACAATTTTAGAGAGCCCAACTGATAAAAAAGTAGGCTGGAAAGTG  
ATATTTAACAATATGGTGAATCAAATTTGGGACCATATGATAGAGATTCTTGGAAACCCGGTATATGG  
CAATCAACTTTTCATGAAAACCTAGAAATGGCTCTATGAAAGCAGCAGATAAATTCCTTGATCCTAACA

AAGCAAGTTCTCTATTATCTTCAGGGTTTTCCACCAGACTCGACCTGCAGGCATGCAAGCTCTGATTTCACTTTTTGCATTCTACAAACTGCATAACTCATATGTAATCGCTCCTTTTTAGGTGGCACAAATGTGAGGCATTTTCGCTCTTTCCGGCGAGGCTAGTTACCCTTAAGTTATTGGTATGACTGGTTTTAAGCGCAAAAAGTTGCTTTTTTCGTACCTATTAATGTATCGTTAGAAAACCGACTGTAAAAAGTACAGTCGGCATTATCTCATATTATAAAAGCCAGTCATTAGGCCTATCTGACAATTCCTGAATAGAGTTCATAAACAATCCTGCATGATAACCATCACAAACAGAATGATGTACCTGTAAAGATAGCGGTAAATATATTGAATTACCTTTATTAATGAATTTTCTGCTGTAATAATGGGTAGAAGGTAATTACTATTATTGATATTTAAGTTAAACCCAGTAAATGAAGTCCATGGAATAATAGAAAAGAGAAAAAGCATTTCAGGTATAGGTGTTTTGGGAAACAATTTCCCGAACCATTATTTCTCTACATCAGAAAGGTATAAATCATAAACTCTTTGAAGTCATTCTTTACAGGAGTCCAAATACCAGAGAATGTTTTAGATACACCATCAAAAATTGTATAAAGTGGCTCTAACTTATCCCAATAACCTAACTCTCCGTCGCTATTGTAAACAGTTCTAAAAGCTGTATTTGAGTTTATCACCCTTGTCACTAAGAAAATAAATGCAGGGTAAAATTTATACCTTCTTGTTTTATGTTTCGGTATAAAACATAATCAATTTCTGTGGTTATACTAAAAGTCGTTTGTGGTTCAAATAATGATTAATATCTCTTTCTCTTCCAATTGTCTAAATCAATTTTATTAAAGTTCATTTGATATGCCTCCTAAATTTTTATCTAAAGTGAATTAGGAGGCTTACTTGTCTGCTTCTTTCATTAGAAATCAATCCTTTTTTAAAAGTCAATATTACTGTAACATAAATATATTTAAAAATATCCCACCTTATCCAATTTTCGTTTGTGTTGAACATAATGGGTCTTTAGTTGAGAATAAAGACCACATTAATAAATGTGGTCTTTTGTGTTTTTTTTAAAGGATTTGAGCGTAGCGAAAAATCCTTTTCTTTCTTATCTTGATAATAAGGGTAACTATTGCCGGGATAGACTGTAACATTCTCACGCATAAATCCCTTTTCATTTTCTAATGTAAATCTATTACCTTATTATTAATTCAATTCGCTCATAATTAATCCTTTTCTTATTACGCAAAATGGCCCGATTTAAGCACACCCTTTATTCCGTTAATGCGCCATGACAGCCATGATAATTAATAACTAGGAGAAGTTAATAAATACGGGTGATCTAATGATTCAATGATTCAAACCCTTGTGAACCTTTTAGAACAAAAGAGGTTGTAACAAGATTTTCTTACACTAGCAATGTTAGTAATTTTTAAATAGGGACTTATATACCAGCTCCAGGAGTAAATCCTGCAGCTTTTGATAATCCCAAGGTTCTCAAGGTGCCACTGAGTTATTAATACTTTTGGTGGCGGAGCCTTGAACGATTTTCTATTTTTGCAATGGGTATTGTACCCTACATCACTGCATCAATCGTAATGCAATTATTACAAATGGATATTGTCCCATAATTCTCAGAATGGGCAAAACAAGGTGAAGTAGGTAGAAGAAAGTTAATAACGTTACTCGTTATTTAGCAATTTCTTTAGCATTTATCCAATCTATAGGTATGGCATTCCAATTAATAATTATCTCAAAGGTGCGCTGATTATCAATCAGTCAATTATGAGTTATTTATTAATAGCACTAGTTTTGACAGCAGGAACTGCTTTCTTAATATGGCTTGGTGATCAATCACTCAGTTCCGGTGTGGTAATGGTATTTCTATTATCATATTCCCATCAAGCTATTTTAATTATACTCTATCAATGATAGAGTGCAATATTTTTTTAGTTTTTCATGAACTCGATCGAGGGGATCCAAATAAAAAACTAGTTTGACAAATAACTCTATCAATGATAGAGTGCAACAAAAAGGAGGAATTAATGATGTCTAGATTAGATAAAAGTAAAGTGATTAACAGCGCATTAGAGCTGCTTAATGAGGTCCGAATCGAAGGTTTAAACAACCCGTAAACTCGCCAGAAAGCTAGGTGTAGAGCAGCCTACATTGTATTGGCATGTAAAAAATAAGCGGGCTTTGCTCGACGCCTTAGCCATTGAGATGTTAGATAGGCACCATACTCACTTTTGCCCTTTAGAAGGGGAAAGCTGGCAAGATTTTTTACGTAATAACGCTAAAAGTTTTAGATGTGCTTTACTAAGTCATCGCGATGGAGCAAAAGTACATTTAGGTACACGGCCTACAGAAAAACAGTATGAACTCTCGAAAAATCAATTAGCCTTTTTATGCCAACAAGTTTTTCACTAGAGAATGCATTATATGCACTCAGCGCTGTGGGGCATTACTTTAGGTTGCGTATTGGAAGATCAAGAGCATCAAGTCGCTAAAGAAGAAAGGGAAACACCTACTACTGATAGTATGCCGCCATTATTACGACAAGCTATCGAATTATTTGATCACCAAGGTGCAGAGCCAGCCTTCTTATTCCGGCCTTGAATTTGATCATATGCGGATTAGAAAAACAACATAATGTGAAAGTGGGTCTTAAAAGCAGCATAACCTTTTTCCGTGATGGTAACTTCACGGTAACCAAGATAACAAAGAATACAAGAAAAATTTACAAAAATCAATTTAACAATTCCTTAAAACATGCAGGAATTGACGATTTAAACAATATTAGCTTTGAACAATTCTTATCTCTTTTCAATAGCTATAAATTATTTAATAAGTAAGTTAAGGGATGCATAAACTGCATCCCCTTAACCTGTTTTTCGTGTGCCTATTTTTTGTGAATCGATTATGTCTTTTGCAGTCGGCTTAAACCAGTTTTCGCTGGTGCGAAAAAGAGTGTCTTGTGACACCTAAATTCAAATCTATCGGTGAGATTTTATACCGATTTGATTTTATATATTCTTGAATAACATACGCCGAGTTATCACATAAAAGCGGGAACCAATCATCAAATTTAACTTCATTGCATAATCCATTAACCTCTTAAATTCTACGATTCCTTGTTCATCAATAAACTCAATCAATTTCTTAAATTTATATCTATCTGTTGTTGTTTTCTTTAATAATTCATCAACATCTACACCGCCATAAACTATCATATCTTCTTTTTGATATTTAAATTTATTAGGATCGTCCATGTGAAGCATATATCTCACAAGACCTTTACACTTCCTGCAATCTGCGGAATAGTCGCATTCAATCTTCTGTAATTTTATCTGTTTATAAGATTTATTACCCTCATACATCACTAGAATATGATAATGCTCTTTTTTATCCTATCTTCTGTATCAGTATCCCTATCATGTAATGGAGACACTACAAATTGAATGTGTAATCTTTTTAAATACTCTAACCCTCGGCTTTTGTGATTCTGGATATAAAACAATGTCCAATTACGCTCTTTGAATTTTTCTTGTTCAGTTTCTTTTATTACATTTTCGCTCATGATATAATAACGGTGCTAATACATTTAACAAAATTTAGTCATAGATAGGCAGCATGCCAGTGCTGTCTATCTTTTTTGTAAAATGCAACCGTATTCTCCTTTGCATATTTTTTATTAGAATACCGGTTGCATCTGATTTGCTAATATTATTTTT

CTTTGATTCTATTTAATATCTCATTTTTCTTCTGTTGTAAGTCTTAAAGTAACAGCAACTTTTTCTCTTCT  
TTTCTATCTACAACCATCACTGTACCTCCCAACATCTGTTTTTTTCACTTTAACATAAAAAACAACCTTT  
TAACATTA AAAACCCAATATTTATTTATTTGTTTGGACAATGGACAATGGACACCTAGGGGGGAGGTC  
GTAGTACCCCTATGTTTTCTCCCCTAAATAACCCCAAAAATCTAAGAAAAAAGACCTCAAAAAGG  
TCTTTAATTAACATCTCAAATTTGCGATTTATTCCAATTTCTTTTTGCGTGTGATGCGCTGCGTCCAT  
TAAAAATCCTAGAGCTTTGCAACCGAAAGTTAATAGCTGTCGCTACTACTTTTCGCTTACGCTCTAAGT  
ATATTTTAAGGACTGTCACACGCAAAAAGTTTTCTCGGCATAAAAGTACCTCTACATCTCTAAATCGT  
TGACGCTGTTTCTCACGCTTTCTATCGACCTTCTGGACATTATCCTGTACAACATCCATAAACTGTC  
CCACACGCTCGAATTTGGAATCATTAAAGAATTTCTCTTTAAGCCTATTAACCCTTTCTCAAACCCAG  
GGAAATTCGCCCTCGCAGCACGATATAAAGTCACTGTACTATCTTGAAATTTCTCTGATACATTCAAC  
TGCTCATTCAAATATCATTCTCTCGCTTTAATTTATTAACCTCTTACTTTTTTCGTGATACCCCTCTT  
TCCATGTATTCACTACTTCTTTCAAACCTCTCTACGTTTTTTTAAATCTTGATTTTCTGTGTAATAGTC  
TGTGCTCTTAATATTTTCGTAATCATCAACAATCCGTTCTGCCTCGCGCGTTTTCGGTGATGACGGTG  
AAAACCTCTGACACATGCAGCTCCCGGAGACGGTACAGCTTGTCTGTAAGCGGATGCCGGGAGCA  
GACAAGCCCGTCAGGGCGCGTCAGCGGGTGTGGCGGGTGTGCGGGCGCAGCCATGACCCAGTC  
ACGTAGCGATAGCGGAGTGTATACTGGCTTAACTATGCGGCATCAGAGCAGATTGTACTGAGAGTGC  
ACCATATGCGGTGTGAAATACCGCACAGATGCGTAAGGAGAAAATACCGCATCAGGCGCTCTTCCG  
CTTCTCGCTCACTGACTCGCTGCGCTCGGTCTGGCTGCGGCGAGCGGTATCAGCTCACTCAA  
AGGCGGTAATACGGTTATCCACAGAATCAGGGGATAACGCAGGAAAGAACATGTGAGCAAAAAGGCC  
AGCAAAAGGCCAGGAACCGTAAAAAGGCCGCGTTGCTGGCGTTTTTCCATAGGCTCCGCCCCCTG  
ACGAGCATCACA AAAATCGACGCTCAAGTCAGAGGTGGCGAAACCCGACAGGACTATAAAGATACC  
AGGCGTTTTCCCTGGAAGCTCCCTCGTGCCTCTCCTGTTCCGACCCTGCCGCTTACCGGATACC  
TGTCCGCCTTTCTCCCTTCGGGAAGCGTGGCGTTTTCTCATAGCTCACGCTGTAGGTATCTCAGTTC  
GGTGTAGGTCGTTGCTCCAAGCTGGGCTGTGTGCACGAACCCCGTTCCAGCCCGACCGCTGCG  
CCTTATCCGGTAACATCGTCTTGAGTCCAACCCGGTAAGACACGACTTATCGCCACTGGCAGCAGC  
CACTGGTAACAGGATTAGCAGAGCGAGGTATGTAGGCGGTGCTACAGAGTTCTTGAAGTGGTGGCC  
TAACTACGGCTACACTAGAAGGACAGTATTTGGTATCTGCGCTCTGCTGAAGCCAGTTACCTTCGGA  
AAAAGAGTTGGTAGCTCTTGATCCGGCAAACAACCCAGCTGGTAGCGGTGGTTTTTTTGTGTTGCA  
AGCAGCAGATTACGCGCAGAAAAAAGGATCTCAAGAAGATCCTTTGATCTTTTCTACGGGGTCTGA  
CGCTCAGTGGAACGAAAACCTCACGTTAAGGGATTTGGTCAATGAGATTATCAAAAAGGATCTTACCT  
AGATCCTTTTAAATTA AAAATGAAGTTTTAAATCAATCTAAAGTATATATGAGTAACTTGGTCTGACA  
GTTACCAATGCTTAATCAGTGAGGCACCTATCTCAGCGATCTGTCTATTTTCGTTTCATCCATAGTTGCC  
TGACTCCCGTTCGTGTAGATAACTACGATACGGGAGGGCTTACCATCTGGCCCCAGTGCTGCAATG  
ATACCGCGAGACCCACGCTCACCGGCTCCAGATTTATCAGCAATAAACCCAGCCAGCCGGAAGGGCC  
GAGCGCAGAAGTGGTCTGCAACTTTATCCGCTCCATCCAGTCTATTAATTGTTGCCGGGAAGCTA  
GAGTAAGTAGTTCGCCAGTTAATAGTTTGCACAACGTTGTTGCCATTGCTGCAGGCATCGTGGTGT  
ACGCTCGTCTTTGGTATGGCTTCATTACGCTCCGGTTCCCAACGATCAAGGCGAGTTACATGATCC  
CCCATGTTGTGCAAAAAGCGGTTAGCTCCTTCGGTCTCCGATCGTTGTCAGAAGTAAGTTGGCCG  
CAGTGTATCACTCATGGTTATGGCAGCACTGCATAATTCTTACTGTATGCCATCCGTAAGATGC  
TTTTCTGTGACTGGTACTCAACCAAGTCATTCTGAGAATAGTGTATGCGGCGACCGAGTTGCT  
CTTGCCCGCGTCAACACGGGATAATACCGGCCACATAGCAGAACTTTAAAAGTGCTCATCATTGG  
AAAACGTTCTTCGGGGCGAAAACCTCTCAAGGATCTTACCGCTGTTGAGATCCAGTTTCGATGTAACCC  
ACTCGTGACCCAACTGATCTTACGATCTTTTACTTTTACCAGCGTTTTCTGGGTGAGCAAAAACAGG  
AAGGCAAAAATGCCGCAAAAAGGGAATAAGGGCGACACGGAAATGTTGAATACTCATACTTTCCTT  
TTTCAATATTATTGAAGCATTATCAGGGTATTGTCTCATGAGCGGATACATATTTGAATGTATTTAG  
AAAAATAACAATAGGGGTTCCGCGCACATTTCCCGAAAAGTGCCACCTGACGTCTAAGAAACCA  
TTATTA

---

**pJB38\_P1sae\_sodM RBS\_geh**

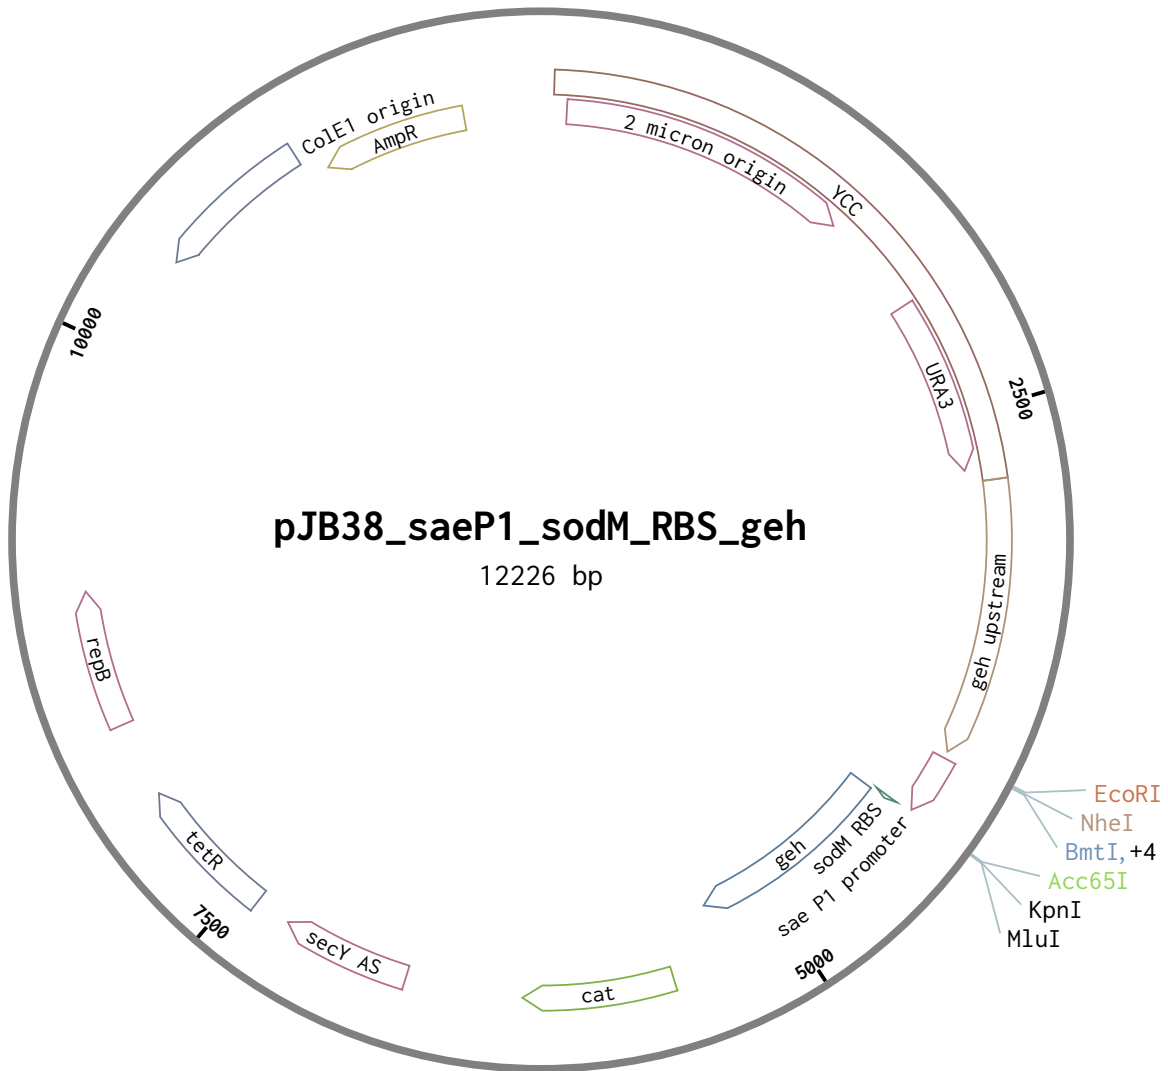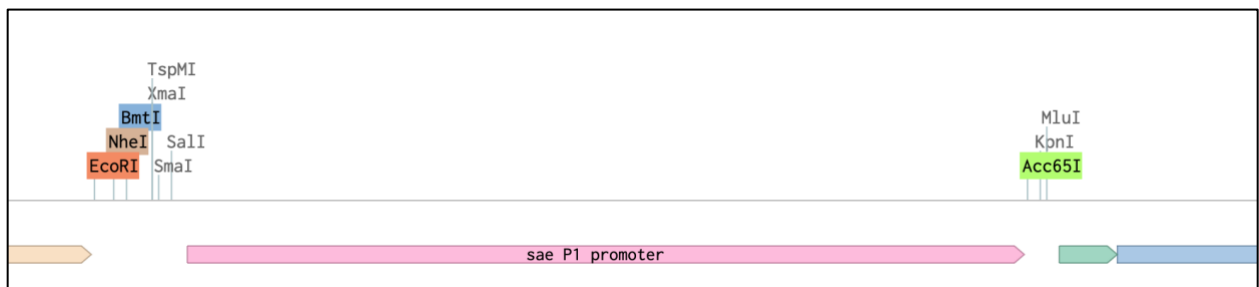

TCATGACATTAACCTATAAAAATAGGCGTATCACGAGGCCCTTTTCGTCTTCAAGAATTGGTGCCACTT  
 TTCGGGGAAAAGTTACGCTAGGGATAACAGGGTAATATAGCACCTGAACGAAGCATCTGTGCTTCAT  
 TTTGTAGAACAAAAATGCAACGCGAGAGCGCTAATTTTTCAAACAAAGAATCTGAGCTGCATTTTTAC  
 AGAACAGAAATGCAACGCGAAAGCGCTATTTTACCAACGAAGAATCTGTGCTTCATTTTTGTAAAACA  
 AAAATGCAACGCGAGAGCGCTAATTTTTCAAACAAAGAATCTGAGCTGCATTTTTACAGAACAGAAAT  
 GCAACGCGAGAGCGCTATTTTACCAACAAAGAATCTATACTTCTTTTTTGTCTACAAAAATGCATCCC  
 GAGAGCGCTATTTTTCTAACAAAGCATCTTAGACTTTTTTTCTCCTTTGTGCGCTCTATAATGCAG

TCTCTTGATAACTTTTTGCACTGTAGGTCCGTTAAGGTTAGAAGAAGGCTACTTTGGTGTCTATTTTCT  
CTTCCATAAAAAAAGCCTGACTCCACTTCCCGCTTTACTGATTACTAGCGAAGCTGCGGGTGCATTT  
TTTCAAGATAAAGGCATCCCCGATTATATTCTATACCGATGTGGATTGCGCATACTTTGTGAACAGAA  
AGTGATAGCGTTGATGATTCTTCATTGGTCAGAAAATTATGAACGGTTTCTTCTATTTTGTCTCTATAT  
ACTACGTATAGGAAATGTTTACATTTTCGTATTGTTTTCGATTCACTCTATGAATAGTTCCTACTACAAT  
TTTTTTGTCTAAAGAGTAATACTAGAGATAAACATAAAAAATGTAGAGGTCGAGTTTAGATGCAAGTTC  
AAGGAGCGAAAGGTGGATGGGTAGGTTATATAGGGATATAGCACAGAGATATATAGCAAAGAGATAC  
TTTTGAGCAATGTTTGTGGAAGCGGTATTCGCAATATTTTAGTAGCTCGTTACAGTCCGGTGCGTTTT  
TGGTTTTTTGAAAGTGCGTCTTCAGAGCGCTTTTGGTTTTCAAAGCGCTCTGAAGTTCCTATACTTT  
CTAGAGAATAGGAACTTCGGAATAGGAACTTCAAAGCGTTTCCGAAAACGAGCGCTTCCGAAAATGC  
AACGCGAGCTGCGCACATACAGCTCACTGTTACGTCGCACCTATATCTGCGTGTTCCTGTATATA  
TATATACATGAGAAGAACGGCATAGTGGTGTATGCTTAAATGCGTACTTATATGCGTCTATTTATG  
TAGGATGAAAGGTAGTCTAGTACCTCCTGTGATATTATCCCATTCCATGCGGGGTATCGTATGCTTCC  
TTCAGCACTACCCTTAGCTGTTCTATATGCTGCCACTCCTCAATTGGATTAGTCTCATCCTTCAATGC  
TATCATTTCTTTGATATTGGATCATACTAAGAAACCATTATTATCATGACATTAACCTATAAAAAATAG  
CGTATCACGAGGCCCTTTCGTCTCGCGCTTTTGGTGTATGACGGTGAAAACCTCTGACACATGAC  
CTCCCGGAGACGGTCACAGCTTGTCTGTAAGCGGATCCGGGAGCAGACAAGCCCGTCAGGGCGC  
GTCAGCGGGTGTGGCGGGTGTGGGGCTGGCTTAACTATGCGGCATCAGAGCAGATTGTAAGT  
AGTGCACCATACCACAGCTTTTCAATTCAATTCATCATTTTTTTTTTATTCTTTTTTTGATTTGCGTTTT  
TTTGAATTTTTTTGATTCGGTAATCTCCGAACAGAAGGAAGAACGAAGGAAGGAGCACAGACTTAGA  
TTGGTATATATACGCATATGTAGTGTGAAGAAACATGAAATTGCCAGTATTCTTAAACCAACTGCA  
CAGAACAACCTGCAGGAAACGAAGATAAATCATGTCGAAAGCTACATATAAGGAACGTGCTGCT  
ACTCATCCTAGTCTGTTGCTGCCAAGCTATTTAATATCATGCACGAAAAGCAAACAACCTTGTGTGC  
TTCATTGGATGTTCTGACCACCAAGGAATTACTGGAGTTAGTTGAAGCATTAGGTCCCAAAATTTGTT  
TACTAAAAACACATGTGGATATCTTACTGATTTTTCCATGGAGGGCACAGTTAAGCCGCTAAAGGCA  
TTATCCGCCAAGTACAATTTTTACTCTTCGAAGACAGAAAATTTGCTGACATTGGTAATACAGTCAA  
TTGCAGTACTCTGCGGGTGTATACAGAATAGCAGAATGGGCAGACATTACGAATGCACACGGTGTG  
GTGGGCCCAGGTATTGTTAGCGGTTTGAAGCAGGCGGCAGAAGAAGTAACAAAGGAACCTAGAGGC  
CTTTTGATGTTAGCAGAATTGTCATGCAAGGGCTCCCTATCTACTGGAGAATATACTAAGGGTACTGT  
TGACATTGCGAAGAGCGACAAAGATTTTGTATCGGCTTATTGCTCAAAGAGACATGGGTGGAAGA  
GATGAAGTTACGATTGTTGATTATGACACCCGGTGTGGTTTTAGATGACAAGGGAGACGCATTGG  
GTCAACAGTATAGAACCCTGGATGATGTGGTCTCTACAGGATCTGACATTATTATTGTTGGAAGAGG  
ACTATTTGCAAAGGGGAAGGGATGCTAAGGTAGAGGGTGAACGTTACAGAAAAGCAGGCTGGGAAGC  
ATATTTGAGAAGATGCGGCCAGCAAACAGTTACGCTAGGGATAACAGGGTAATATAGCGTAACTAT  
AACGGTCTAATGTGCCGCTGACGCTTTTGTAGTAAAGCCTGATCAGCAATTGGGAAAATATAAATA  
AATGGATAGAAGATATAGCCAAGCCAATCAATGAATGGTGTATAGTTTCGCTACAATCAGTCTAAAA  
ACCAATCGATAATATAGAAGGTAAAATACCAACAGTCATTTCTAAACCGTCTTTCAAATTGTCCCAAC  
GTTCTTCACGAGAGATGGTGTAAATGCATTTTGTTCATCGCCTCTGCATATGCAGTTTTTCAGTCTGC  
TTCTTCAATAGCAACTTCTTGTCTCCTTCTGTCCGTTATAATATTCTGTTGATTATTGCTGATTGG  
CGGTAGCCATGCAGTAATTGCAGTCACGACAAATGTGATGACTAAAGTTATCCAAAAGTATAAATTCC  
AATGCGGCATTAATCCTAAAGTTTTAGCAACGATAATCATAAAAAGTTGCTGAAACTGTTGAAAAGCCA  
GTCGCAATAATCGTGGCTTCTCGTTTTGTTGTACATCCCTTGTATAGACACGATTAGTAATCAATAAT  
CCTAAGGAATAACTGCCGACAAACGAAGCCACTGCATCGACAGCGGATTTTCTGGTGTTTTAAAAA  
TAGGTCTCATAATAGGCTCCATATAAACACCGACAAATTCTAATAAGCCATAGCCACTAATAAAGAA  
AGCGCAATTGCACCTACTGGAATTAAGATACTTAATGGCATCATTAATTTTTCAAACAAAACGGACC  
ATAGTTAGCTTTAAATAGTATTGATGGACCGATTTTAAATACATACATTATACCGATCATTGCACCTGC  
AACTTTAAATAATGTAATGACCAAGTTTGTGATTGAAGTCATAAAAGTACGTCTCACTATTGGTAACGC  
TGTACCAATTAATAATCATAATCAGTGCAACATAGGGCATAAGTGGACCTATGATTGAGCGAATGGCTA  
GATGAACATGATCGACGAAAATAGTGTGTTACCATTAATCGTAAAAGGAATAAAGAAACATAGTATG  
CCCCTAACTATAGACAAAAAACGCCATGCACCTGGTGTGTTGTCATTAGAATGATATTGATTCATT  
AAAGCAACCCCTTTGTTTAAATGAATACACAAAACCTGTATGATGCATCTTCCCCTTAATGAGATGAATC  
ATTATTTTAAATTAAGAAAAATCTGAAAACCTACTATAATTGTATAGTGAATTCGCTAGCGGATCCCCCG  
GGGTGCACATACCAAACCTATTAACACTTCTGATATTCTTAGTTCAAATATCAGAAGTGTTTTATAG  
TGTTATCTAGTTTACAGATAAATATTTCTTACTTAAAAAACGCCCTCCTCTTATTTTGACCCCTATTTAT  
TTAAATCAGACAATTTATTTTCAATTTTCAATTTTCTTCAATATTAGTTAAGCGATTTTAAACGAA  
GTTAAGAATTAGTTAATGGCATATTATTTGCCTTCATTTTAACTTAACTTATCAAATTGGTACCACGC

GTTAGGAGGATGATTATTTATGTTAAGAGGACAAGAAGAAAGAAAGTATAGTATTAGAAAAGTATTCAA  
TAGGCGTGGTGTCAAGTGTAGCGGCTACAATGTTTGTGTGTGCATCACATGAAGCACAAGCCTCGGA  
AAAAACATCAACTAATGCAGCGGCACAAAAAGAAACACTAAATCAACCGGGAGAACAAGGGAATGCG  
ATAACGTCACATCAATGCAGTCAGGAAAGCAATTAGACGATATGCATAAAGAGAATGGTAAAAGTG  
GAACAGTGACAGAAGGTAAGATACGCTTCAATCATCGAAGCATCAATCAACACAAAATAGTAAAACA  
ATCAGAATGCAAAATGATAATCAAGTAAAGCAAGATTCTGAACGACAAGTTCTAAACAGTCACACCA  
AAATAATGCGACTAATAACTGAACGTCAAATGATCAGGTTCAAATACCCATCATGCTGAACGTA  
ATGGATCACAAATCGACAACGTACAATCGAATGATGTTGATAAATCACAACCATCCATTCCGGCACAA  
AAGGTAATACCCAATCATGATAAAGCAGCACCAACTTCAACTACACCCCGTCTAATGATAAACTGC  
ACCTAAATCAACAAAAGCACAAAGATGCAACCACGGACAACATCCAAATCAACAAGATACACATCAAC  
CTGCGCATCAAATCATAGATGCAAAGCAAGATGATACTGTTCCGCAAAGTGAACAGAAACCACAAGT  
TGCCGATTTAAGTAAACATATCGATGGTCAAAATCCCCAGAGAAACCGACAGATAAAAACTGATA  
ATAAACAACTAATCAAAGATGCGCTTCAAGCGCCTAAACACGTTTCGACTACAAATGCAGCAGCAGA  
TGCTAAAAGGTTTCGACCACTTAAAGCGAATCAAGTACAACCACTTAACAAATATCCAGTTGTTTTGT  
ACATGGATTTTAGGATTAGTAGGCGATAATGCACCTGCTTTATATCCAAATTTATGGGCGACCTGCA  
GGCATGCAAGCTGTATTTCACTTTTTGCATTCTACAAACTGCATAACTCATATGTAATCGCTCCTTT  
TTAGGTGGCACAATGTGAGGCATTTTCGCTTTTCCGGCGAGGCTAGTTACCTTAAAGTTATTGGTA  
TGACTGGTTTTAAGCGCAAAAAAAGTTGCTTTTTCTGACCTATTAATGTATCGTTAGAAAACCGACTGT  
AAAAAGTACAGTCGGCATTATCTCATATTATAAAAGCCAGTCATTAGGCCTATCTGACAATTCCTGAAT  
AGAGTTCATAAAACAATCCTGCATGATAACCATCACAACAGAATGATGTACCTGTAAAGATAGCGGTA  
AATATATTGAATTACCTTTATTAATGAATTTTCTGCTGTAATAATGGGTAGAAGGTAATTACTATTATT  
ATTGATATTTAAGTTAAACCCAGTAAATGAAGTCCATGGAATAATAGAAAGAGAAAAAGCATTTCAG  
GTATAGGTGTTTTGGGAAACAATTTCCCGAACCATTATTTCTCTACATCAGAAAGGTATAAATCAT  
AAAACCTTTGAAGTCATTCTTTACAGGAGTCCAAATACCAGAGAATGTTTTAGATACACCATCAAAAA  
TTGTATAAAGTGGCTCTAACTTATCCCAATAACCTAACTCTCCGTCGCTATTGTAACCAGTTCTAAAG  
CTGTATTTGAGTTTATCACCTTGTCACTAAGAAAATAAATGCAGGGTAAAATTTATATCCTTCTTGT  
TTATGTTTCGGTATAAAACACTAATATCAATTTCTGTGGTTATACTAAAAGTCGTTTGTGTTCAAATA  
ATGATTAATATCTCTTTTCTCTTCCAATTGTCTAAATCAATTTTATTAAGTTTCAATTTGATATGCCTCCT  
AAATTTTTATCTAAAGTGAATTTAGGAGGCTTACTTGTCTGCTTTCTTCATTAGAATCAATCCTTTTTTA  
AAAGTCAATATTACTGTAACATAAATATATATTTTAAAAATATCCCACTTTATCCAATTTTCGTTTGTG  
AACTAATGGGTGCTTTAGTTGAAGAATAAAGACCACATTAAAAAATGTGGTCTTTTGTGTTTTTTAAA  
GGATTTGAGCGTAGCGAAAAATCCTTTTCTTTCTTATCTTGATAATAAGGGTAACTATTGCCGGGATA  
GACTGTAACATTCTCACGCATAAAATCCCCTTTCAATTTCTAATGTAATCTATTACCTTATTATTAATT  
CAATTCGCTCATAATTAATCCTTTTTCTTATTACGCAAAATGGCCCGATTTAAGCACACCCTTTATTCC  
GTTAATGCGCCATGACAGCCATGATAATTACTAATACTAGGAGAAGTTAATAAATACGGGTGATCTAA  
TGATTCAATGATTCAAACCTTGTGAACCTCTTTAGAACAAAAGAGGTTTCGTAACAAGATTTTCTTAC  
ACTAGCAATGTTAGTAATTTTTAAAATAGGGACTTATATACCAGCTCCAGGAGTAAATCCTGCAGCTTT  
TGATAATCCCAAGGTTCTCAAGGTGCCACTGAGTTATTAATACTTTTGGTGGCGGAGCCTTGAAC  
GATTTTCTATTTTTGCAATGGGTATTGTACCCTACATCACTGCATCAATCGTAATGCAATTTACAAA  
TGGATATTGTCCTAAATTCTCAGAATGGGCAAAAACAAGGTGAAGTAGGTAGAAGAAAGTTAAATAAC  
GTTACTCGTTATTTAGCAATTTCTTTAGCATTTTATCCAATCTATAGGTATGGCATTCCAATTTAATAATT  
ATCTCAAAGGTGCGCTGATTATCAATCAGTCAATTTATGAGTTATTTATTAATAGCACTAGTTTTGACAG  
CAGGAAGTCTTTCTTAATATGGCTTGGTGATCAAATCACTCAGTTCGGTGTGGTAATGGTATTTCT  
ATTATCATATCCCATCAAGCTTATTTAATTATACTCTATCAATGATAGAGTGTCAATATTTTTTTTAGT  
TTTTCATGAACCTCGATCGAGGGGATCCAAATAAAAAACTAGTTTGACAAATAACTCTATCAATGATAGA  
GTGTCAACAAAAGGAGGAATTAATGATGTCTAGATTAGATAAAAGTAAAGTGATTAACAGCGCATT  
GAGCTGCTTAATGAGGTCGGAATCGAAGGTTTAAACAACCCGTAAACTCGCCCAGAAGCTAGGTGTAG  
AGCAGCCTACATTGATTGGCATGAAAAAATAAGCGGGCTTTGCTCGACGCCTTAGCCATTGAGAT  
GTTAGATAGGCACCATACTCACTTTTGCCCTTTAGAAGGGGAAAGCTGGCAAGATTTTTTACGTAATA  
ACGCTAAAAGTTTTAGATGTGCTTTACTAAGTCATCGCGATGGAGCAAAGTACATTTAGGTACACGG  
CCTACAGAAAAACAGTATGAACTCTCGAAAATCAATTAGCCTTTTTATGCCAACAAGTTTTTCACTA  
GAGAATGCATTATATGCACTCAGCGCTGTGGGGCATTTTACTTTAGGTTGCGTATTGGAAGATCAAG  
AGCATCAAGTCGCTAAAGAAGAAAGGGAAACACCTACTACTGATAGTATGCCGCCATTATTACGACA  
AGCTATCGAATTTTATGATCACCAGGTGCAGAGCCAGCCTTCTTATTCGGCCTTGAATTGATCATAT  
GCGGATTAGAAAAACAATTAATGTGAAAGTGGGTCTTAAAGCAGCATAACCTTTTTCCGTGATGG  
TAACTTCACGGTAACCAAGATAACAAAGAATACAAGAAAATTTTACAAAAATCAATTTAACAATTCC

TTAAACATGCAGGAATTGACGATTTAAACAATATTAGCTTTGAACAATTCTTATCTCTTTTCAATAGCT  
ATAAATTATTTAATAAGTAAGTTAAGGGATGCATAAACTGCATCCCTTAACTTGTTCCTGTCGCTA  
TTTTTGTGAATCGATTATGTCTTTTGCAGTCGGCTTAAACCAGTTTTCGCTGGTGCAGAAAAAGA  
GTGTCTTGTGACACCTAAATTCAAAATCTATCGGTGAGATTTATACCGATTTGATTTTATATATTCTTGA  
ATAACATACGCCGAGTTATCACATAAAAGCGGGAACCAATCATCAAATTTAACTTCATTGCATAATC  
CATTAACTCTTAAATTCACGATTCCTTGTTCATCAATAAACTCAATCATTTCTTTAATTAATTTATATC  
TATCTGTTGTTGTTTTCTTTAATAATTCATCAACATCTACACCGCCATAAACTATCATATCTTCTTTTTG  
ATATTTAAATTTATTAGGATCGTCCATGTGAAGCATATATCTCACAAAGACCTTTCACACTTCCTGCAAT  
CTGCGGAATAGTCGCATTCAATTCCTTCTGTAATTTATTTATCTGTTCAATAAGATTTATTACCCTCATAC  
ATCACTAGAATATGATAATGCTCTTTTTTCATCCTATCTTCTGTATCAGTATCCCTATCATGTAATGGA  
GACACTACAAATTGAATGTGTAACCTTTTTAAATACTCTAACCCTCGGCTTTTGTGATTCTGGATAT  
AAAACAAATGTCCAATTACGTCCTTGAATTTTTCTTGTTCAGTTTCTTTTATTACATTTTCGCTCA  
TGATATAATAACGGTGCTAATACATTTAACAAAATTTAGTCATAGATAGGCAGCATGCCAGTGCTGTC  
TATCTTTTTTGTAAAATGCACCGTATTCCTCCTTGCATATTTTTTATTAGAATACCGGTTGCATC  
TGATTGCTAATATTATTTTTCTTGTATTCTATTTAATATCTCATTTTCTTCTGTTGTAAGTCTTAAAG  
TAACAGCAACTTTTTCTTCTTCTTCTATCTACAACCATCACTGTACCTCCCAACATCTGTTTTTTTCA  
CTTTAACATAAAAAACAACCTTTTAAACATTAACCAACCAATTTATTTATTTGTTTGGACAATGGACAA  
TGGACACCTAGGGGGGAGGTCGTAGTACCCCCCTATGTTTTCTCCCTAAATAACCCCAAAAATCTA  
AGAAAAAAGACCTCAAAAAGGTCTTTAATTAACATCTCAAATTTGCAATTTATTCCAATTTCTTTTTG  
CGTGTGATGCGCTGCGTCCATTAATAATCCTAGAGCTTTGCAACCGAAAAGTTAATAGCTGTGCGCTAC  
TACTTTGCTTACGCTCTAAGTATATTTTAAGGACTGTCACACGCAAAAAGTTTTCTCGGCATAAAAAGT  
ACCTCTACATCTCTAAATCGTCTGTACGCTGTTTCTCACGCTTTCTATCGACCTTCTGGACATTATCCT  
GTACAACATCCATAAACTGTCCCACACGCTCGAATTTGGAATCATTAAAGAATTTCTCTTTAAGCCTAT  
TAAACCCTTTCTCAAACCCAGGGAAATTCGCCCTCGCAGCAGCATATAAAGTCACTGTACTATCTTGA  
AATTTCTCTGATACATTCAACTGCTCATTCAAATCTATTCTCTCGCTTTAATTTATTAACCTCTTAC  
TTTTTTCGTGATACCCCTCTTCCATGTATTCACTACTTCTTCAAACCTCTCTCTACGTTTTTTAATTC  
TTGATTTTCTGTGTAATAGTCTGTGCTCTTAATATTTTCGTAATCATCAACAATCCGTTCCCTGCCTCGC  
GCGTTTTCGGTGTGACGGTGAACACCTCTGACACATGCAGCTCCCGGAGACGGTACAGCTTGTCT  
GTAAGCGGATGCCGGGAGCAGACAAGCCCGTCAGGGCGCGTCAGCGGGTGTGGCGGGTGTGCGG  
GGCGCAGCCATGACCCAGTCACGTAGCGATAGCGGAGTGATACTGGCTTAACTATGCGGCATCAG  
AGCAGATTGACTGAGAGTGCACCATATGCGGTGTGAAATACCGCACAGATGCGTAAGGAGAAAATA  
CCGCATCAGGCGCTCTTCCGCTTCCCTCGCTCACTGACTCGCTGCGCTCGGTCGTTCCGGCTGCGGGC  
AGCGGTATCAGCTCACTCAAAGGCGGTAATACGGTTATCCACAGAATCAGGGGATAACGCAGGAAA  
GAACATGTGAGCAAAAAGGCCAGCAAAAAGGCCAGGAACCGTAAAAAGGCCGCGTTGCTGGCGTTTTT  
CCATAGGCTCCGCCCCCTGACGAGCATCAAAAATCGACGCTCAAGTCAGAGGTGGCGAAACCC  
GACAGGACTATAAAGATACCAGGCGTTTTCCCCCTGGAAGCTCCCTCGTGCCTCTCCTGTTCCGAC  
CCTGCCGCTTACCGGATACCTGTCCGCTTTCTCCCTTCGGGAAGCGTGGCGCTTTCTCATAGCTCA  
CGCTGTAGGTATCTCAGTTCGGTGTAGGTCGTTCCGCTCCAAGCTGGGCTGTGTGCACGAACCCCCC  
GTTACAGCCCAGCGCTGCGCCTTATCCGGTAACATCGTCTTGTAGTCCAACCCGGTAAGACACGACT  
TATCGCCACTGGCAGCAGCACTGGTAACAGGATTAGCAGAGCAGGTATGTAGGCGGTGCTACAG  
AGTTCTTGAAGTGGTGGCCTAACTACGGCTACACTAGAAGGACAGTATTTGGTATCTGCGCTCTGCT  
GAAGCCAGTTACCTTCGAAAAAGAGTTGGTAGCTCTTGATCCGGCAAACAACCCACCGCTGGTAGC  
GGTGGTTTTTTTGTGCAAGCAGCAGATTACGCGCAGAAAAAAGGATCTCAAGAAGATCCTTTGAT  
CTTTTCTACGGGTCTGACGCTCAGTGAACGAAAACCTCACGTTAAGGGATTTTGGTCATGAGATTA  
TCAAAAAGGATCTTACCTAGATCCTTTTAAATTAAAAATGAAGTTTTAAATCAATCTAAAGTATATATG  
AGTAAACTTGGTCTGACAGTTACCAATGCTTAATCAGTGAGGCACCTATCTCAGCGATCTGTCTATTT  
CGTTCATCCATAGTTGCCTGACTCCCCGTCGTGTAGATAACTACGATACGGGAGGGCTTACCATCTG  
GCCCCAGTGCTGCAATGATACCGCGAGACCCACGCTCACC GGCTCCAGATTTATCAGCAATAAACC  
AGCCAGCCGGAAGGGCCGAGCGCAGAAGTGGTCTGCAACTTTATCCGCCTCCATCCAGTCTATTA  
ATTGTTGCCGGGAAGCTAGAGTAAGTAGTTCGCCAGTTAATAGTTTGCGCAACGTTGTTGCCATTGC  
TGCAGGCATCGTGGTGTACGCTCGTCTTGGTATGGCTTCATTAGCTCCGGTTCCTCAACGATCA  
AGGCGAGTTACATGATCCCCATGTTGTGCAAAAAGCGGTTAGCTCCTTCGGTCTCCGATCGTTG  
TCAGAAGTAAGTTGGCCGAGTGTATCACTCATGGTTATGGCAGCACTGCATAATTTCTTACTGTC  
ATGCCATCCGTAAGATGCTTTTCTGTGACTGGTGTAGTACTCAACCAAGTCATTCTGAGAATAGTGTAT  
GCGGCGACCGAGTTGCTCTTGCCCGGCTCAACACGGGATAATACCGCGCCACATAGCAGAACTTT  
AAAAGTGCTCATCATTGAAAACGTTCTTCGGGGCGAAAACCTCTCAAGGATCTTACCGCTGTTGAGA

TCCAGTTCGATGTAACCCACTCGTGCACCCAAGTATCTTCAGCATCTTTTACTTTCCACCAGCGTTTC  
 TGGGTGAGCAAAAACAGGAAGGCAAAATGCCGCAAAAAGGGAATAAGGGCGACACGGAAATGTTG  
 AATACTCATACTCTTCCTTTTTCAATATTATTGAAGCATTATCAGGGTTATTGTCTCATGAGCGGATA  
 CATATTTGAATGTATTTAGAAAAATAAACAAATAGGGGTTCGCGCACATTTCCCGAAAAGTGCCAC  
 CTGACGTCTAAGAAACCATTATTA

**pJB38\_P1sae\_TIR RBS\_geh**

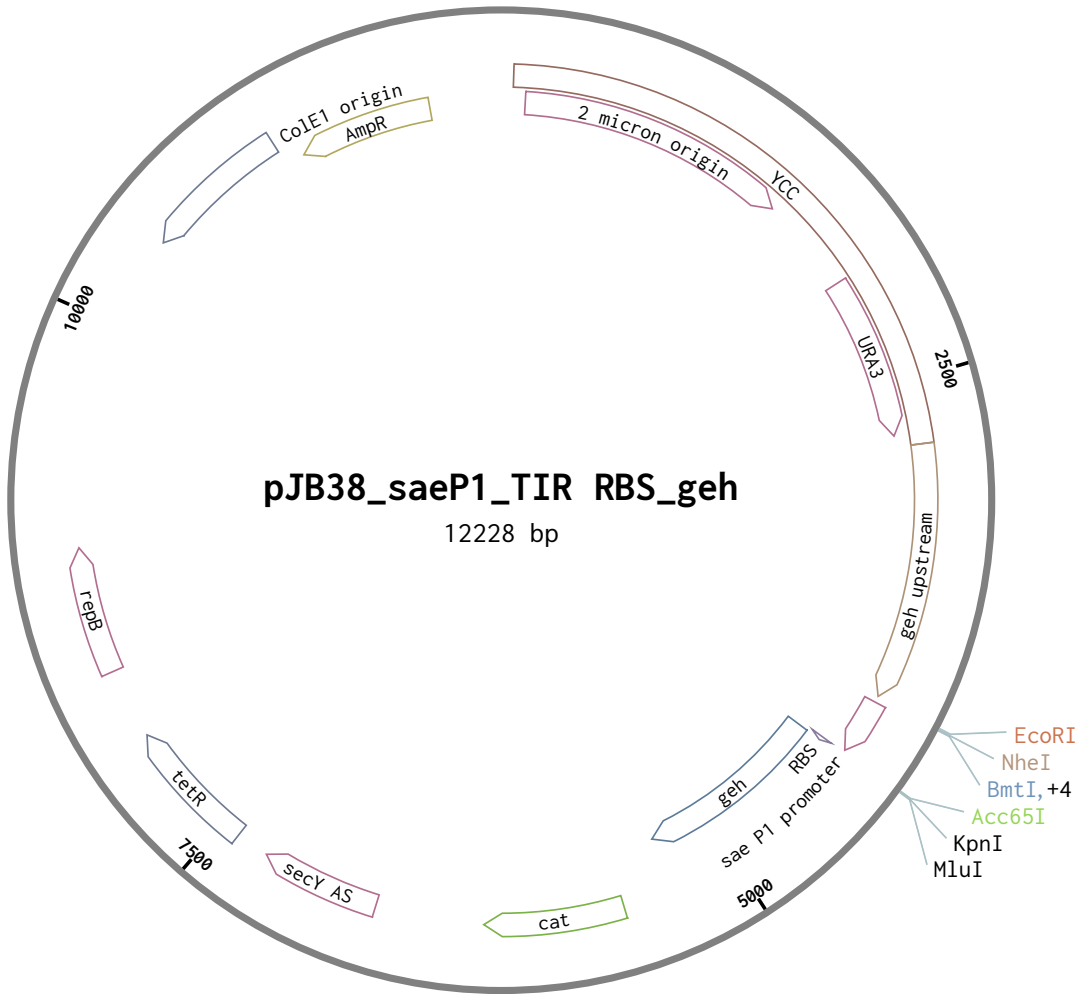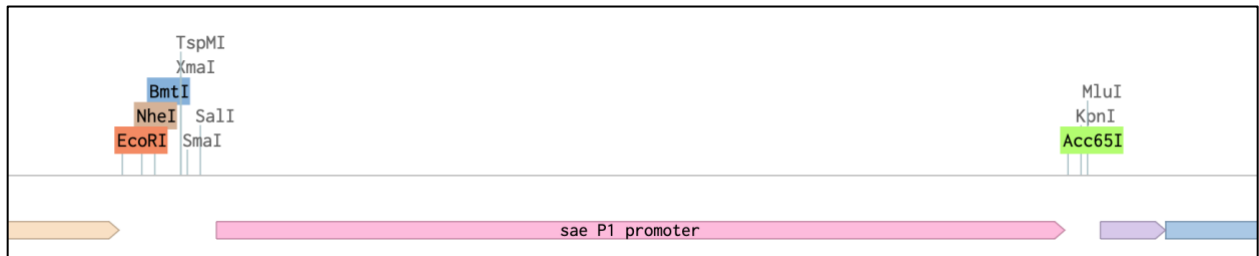

TCATGACATTAACCTATAAAAATAGGCGTATCACGAGGCCCTTTTCGTCTTCAAGAATTGGTGCCACTT  
 TTCGGGGAAAAGTTACGCTAGGGATAACAGGGTAATATAGCACCTGAACGAAGCATCTGTGCTTCAT  
 TTTGTAGAACAAAAATGCAACGCGAGAGCGCTAATTTTTCAAACAAAGAATCTGAGCTGCATTTTTAC  
 AGAACAGAAATGCAACGCGAAAAGCGCTATTTTACCAACGAAGAATCTGTGCTTCATTTTTGTAAAACA



AAAATGCAACGCGAGAGCGCTAATTTTTCAAACAAAGAATCTGAGCTGCATTTTTACAGAACAGAAAT  
GCAACGCGAGAGCGCTAATTTTACCAACAAAGAATCTATACTTCTTTTTTTGTTCTACAAAAATGCATCCC  
GAGAGCGCTAATTTTTCTAACAAAGCATCTTAGATTACTTTTTTTCTCCTTTGTGCGCTCTATAATGCAG  
TCTCTTGATAACTTTTTGCACTGTAGGTCCGTTAAGGTTAGAAGAAGGCTACTTTGGTGTCTATTTTTCT  
CTTCATAAAAAAAGCCTGACTCCACTTCCCGCGTTTACTGATTACTAGCGAAGCTGCGGGTGCATTT  
TTTCAAGATAAAGGCATCCCCGATTATATTCTATACCGATGTGGATTGCGCATACTTTGTGAACAGAA  
AGTGATAGCGTTGATGATTCTTCATTGGTCAGAAAATTATGAACGGTTTCTTCTATTTTTGTCTCTATAT  
ACTACGTATAGGAAATGTTTACATTTTCGTATTGTTTTCGATTCACTCTATGAATAGTTCCTACTACAAT  
TTTTTTGTCTAAAGAGTAATACTAGAGATAAACATAAAAAATGTAGAGGTGCGAGTTTAGATGCAAGTTC  
AAGGAGCGAAAGGTGGATGGGTAGGTTATATAGGGATATAGCACAGAGATATATAGCAAAGAGATAC  
TTTTGAGCAATGTTTGTGGAAGCGGTATTCGCAATATTTTAGTAGCTCGTTACAGTCCGGTGCGTTTT  
TGGTTTTTTGAAAGTGCGTCTTCAGAGCGCTTTTGGTTTTCAAAGCGCTCTGAAGTTCCTATACTTT  
CTAGAGAATAGGAACTTCGGAATAGGAACTTCAAAGCGTTTCCGAAAACGAGCGCTTCCGAAAATGC  
AACGCGAGCTGCGCACATACAGCTCACTGTTACAGTCGCACCTATATCTGCGTGTTCCTGTATATA  
TATATACATGAGAAGAACGGCATAAGTGCCTGTTTATGCTTAAATGCGTACTTATATGCGTCTATTTATG  
TAGGATGAAAGGTAGTCTAGTACCTCCTGTGATATTAATCCATTCCATGCGGGGTATCGTATGCTTCC  
TTCAGCACTACCCTTTAGCTGTTCTATATGCTGCCACTCCTCAATTGGATTAGTCTCATCCTTCAATGC  
TATCATTTCCTTTGATATTGGATCATACTAAGAAACCATTATTATCATGACATTAACCTATAAAAAATAGG  
CGTATCACGAGGCCCTTTTCGTCTCGCGCGTTTTCGGTGATGACGGTGAAAACCTCTGACACATGCAG  
CTCCCGGAGACGGTACAGCTTGTCTGTAAGCGGATGCCGGGAGCAGACAAGCCCGTCAGGGCGC  
GTCAGCGGGTGTGGCGGGTGTGGGGCTGGCTTAACTATGCGGCATCAGAGCAGATTGTAAGTGCAG  
AGTGCACCATACCACAGCTTTTCAATTCAATTCATCATTTTTTTTTTTTATTCTTTTTTTTATTCTCGGTTTC  
TTTGAAATTTTTTTGATTTCGGTAATCTCCGAACAGAAGGAAGAACGAAGGAAGGAGCACAGACTTAGA  
TTGGTATATATACGCATATGTAGTGTGAAGAAACATGAAATTGCCAGTATTCTTAAACCCAACTGCA  
CAGAACAAAAACCTGCAGGAAACGAAGATAAATCATGTCGAAAGCTACATATAAGGAACGTGCTGCT  
ACTCATCCTAGTCTGTTGCTGCCAAGCTATTTAATATCATGCACGAAAAGCAAACAAACTTGTGTGC  
TTCATTGGATGTTCTGACCACCAAGGAATTACTGGAGTTAGTTGAAGCATTAGGTCCCAAAATTTGTT  
TACTAAAACACATGTGGATATCTTACTGATTTTTTCCATGGAGGGCACAGTTAAGCCGCTAAAGGCA  
TTATCCGCCAAGTACAATTTTTTACTCTTCGAAGACAGAAAATTTGCTGACATTGGTAATACAGTCAA  
TTGCAGTACTCTGCGGGTGTATACAGAATAGCAGAATGGGCAGACATTACGAATGCACACGGTGTG  
GTGGGCCCAGGTATTGTTAGCGGTTTTGAAGCAGGCGGCAGAAGAAGTAACAAAGGAACCTAGAGGC  
CTTTTGATGTTAGCAGAATTGTCATGCAAGGGCTCCCTATCTACTGGAGAATATACTAAGGGTACTGT  
TGACATTGCGAAGAGCGACAAAGATTTTGTATCGGCTTTATTGCTCAAAGAGACATGGGTGGAAGA  
GATGAAGGTTACGATTGTTGATTATGACACCCGGTGTGGGTTTAGATGACAAGGGAGACGCATTGG  
GTCAACAGTATAGAACCGTGGATGATGTGGTCTCTACAGGATCTGACATTATTATTGTTGGAAGAGG  
ACTATTTGCAAAGGGAAGGGATGCTAAGGTAGAGGGTGAACGTTACAGAAAAGCAGGCTGGGAAGC  
ATATTTGAGAAGATGCGGCCAGCAAACAGTTACGCTAGGGATAACAGGGTAATATAGCGTAACTAT  
AACGGTCTAATGTGCCGCTGACGCTTTTGTAGTAAAGCCTGATCAGCAATTGGGAAAATATAAATA  
AATGGATAGAAGATATAGCCAAGCCAATCAATGAATGGTGTATAGTTTCGCTACAATCAGTCTAAAAA  
ACCAATCGATAATATAGAAGGTAAAAATACCAACAGTCATTTCTAAACCGTCTTTCAAATTTGCCAAAC  
GTTCTTCACGAGAGATGGTGTAAATGCATTTTGTTCATCGCCTCTGCATATGCAGTTTTTCAGTCTGC  
TTCCCTCAATAGCAACTTCTTGTCTCCTTCTTGTCCGTTATAATATTCTGTTGATTCAATTGCTGATTGG  
CGGTAGCCATGCAGTAATTGCAGTACGACAAATGTGATGACTAAAGTTATCCAAAAGTATAAATTCC  
AATGCGGCATTAATCCTAAAGTTTTAGCAACGATAATCATAAAAGTTGCTGAAACTGTTGAAAAGCCA  
GTCGCAATAATCGTGGCTTCTCGTTTTGTTGTACATCCCTTGTATAGACACGATTAGTAATCAATAAT  
CCTAAGGAATAACTGCCGACAAACGAAGCCACTGCATCGACAGCGGATTTTCTGGTGTTTTAAAAA  
TAGGTCTCATAATAGGCTCCATATAAACACCGACAAATTCTAATAAGCCATAGCCACTAATAAAGAA  
AGCGCAATTGCACCTACTGGAATTAAGATACTTAATGGCATCATTAATTTTTCAAACAAAAACGGACC  
ATAGTTAGCTTTAAATAGTATTGATGGACCGATTTTAAATACATACATTATACCGATCATTGCACCTGC  
AACTTTAAATAATGTAATGACCAAGTTTGTGATTGAAGTCATAAAAGTACGTCTCACTATTGGTAACGC  
TGTACCAATTAATAATCATAATCAGTGAACATAGGGCATAAGTGGACCTATGATTGAGCGAATGGCTA  
GATGAACATGATCGACGAAAATAGTGTGTTACCATTAATCGTAAAAGGAATAAAGAAACATAGTATG  
CCCATAAATATAGACAAAAAACGCCATGCACCTTGGTTGTTGTGCATTAGAATGATATTGATTCATT  
AAAGCAACCCCTTTGTTTAAATGAATACAAAACTGTATGATGCATCTTCCCTTAATGAGATGAATC  
ATTATTTTAAATTTAGAAAAATCTGAAAACCTACTATAATTGTATAGTAATTCCGCTAGCGGATCCCCCG  
GGTTCGACATACCAAAACCTATTAACACTTCTGATATTCTTAGTTCAAATATCAGAAGTGTTTTATAG

TGTTATCTAGTTCAGATAAATATTTTCTTACTTAAAAAACGCCCTCCTCTTATTTTGACCCCTATTTAT  
TTAAATCAGACAATTATTTTCATTTTCAAATTATTCTTTCTTCAATATTAGTTAAGCGATATTTAAACGAA  
GTTAAGAATTAGTTAATGGCATATTATTTGCCTTCATTTTAACTTAACTTATCAAATTGGTACCACGC  
GTTTATAAGGAGGAAAAACATATGTTAAGAGGACAAGAAGAAAGTATAGTATTAGAAAGTATTC  
AATAGGCGTGGTGTCACTGTTAGCGGCTACAATGTTTGTGTGTGCATCACATGAAGCACAAGCCTCG  
GAAAAACATCAACTAATGCAGCGGCACAAAAAGAACTAAATCAACCGGGAGAACAAGGGAATG  
CGATAACGTCACATCAATGCAGTCAGGAAAGCAATTAGACGATATGCATAAAGAGAATGGTAAAAG  
TGGAACAGTGACAGAAGGTAAAGATACGCTTCAATCATCGAAGCATCAATCAACACAAAATAGTAAA  
CAATCAGAATGCAAAATGATAATCAAGTAAAGCAAGATTCTGAACGACAAGGTTCTAAACAGTCACAC  
CAAATAATGCGACTAATAACTGAACGTCAAAATGATCAGGTTCAAAATACCCATCATGCTGAACG  
TAATGGATCACAATCGACAACGTCACAATCGAATGATGTTGATAAATCACAACCATCCATTCCGGCAC  
AAAAGGTAATACCAATCATGATAAAGCAGCACCAACTTCAACTACACCCCGTCTAATGATAAACT  
GCACCTAAATCAACAAAAGCACAAGATGCAACCACGGACAAACATCCAAATCAACAAGATACACATC  
AACCTGCGCATCAAATCATAGATGCAAAGCAAGATGATACTGTTGCGCAAAGTGAACAGAAAACCACA  
AGTTGGCGATTTAAGTAAACATATCGATGGTCAAAATTTCCCGAGAGAAACCGACAGATAAAAATACTG  
ATAATAACAACATAATCAAAGATGCGCTTCAAGCGCCTAAAACACGTTCCGACTCAAATGCAGCAGCA  
GATGCTAAAAAGGTTTCGACCCTTAAAGCGAATCAAGTACAACCACTTAAACAAATATCCAGTTGTTTT  
TGTACATGGATTTTTAGGATTAGTAGGCGATAATGCACCTGCTTTATATCCAAATTATTGGGCGACCT  
GCAGGCATGCAAGCTCTGATTTCACTTTTTGCATTCTACAACTGCATAACTCATATGTAAATCGCTC  
CTTTTTAGGTGGCACAATGTGAGGCATTTTCGCTCTTTCCGGCGAGGCTAGTTACCCTTAAGTTATT  
GGTATGACTGGTTTTAAGCGCAAAAAAGTTGCTTTTTCGTACCTATTAATGTATCGTTAGAAAACCG  
ACTGTAAAAGTACAGTCGGCATTATCTCATATTATAAAAGCCAGTCATTAGGCCTATCTGACAATTC  
CTGAATAGAGTTCATAACAATCCTGCATGATAACCATCACAAACAGAATGATGTACCTGTAAAGATA  
GCGGTAAATATATTGAATTACCTTTAATGAATTTTCTGCTGTAATAATGGGTAGAAGGTAATTAC  
TATTATTATTGATATTTAAGTAAACCCAGTAAATGAAGTCCATGGAATAATAGAAAGAGAAAAAGCAT  
TTTCAGGTATAGGTGTTTTGGGAAACAATTTCCCGAACCATTATATTTCTCTACATCAGAAAGGTATA  
AATCATAAACTCTTTGAAGTCATTCTTTACAGGAGTCCAATACCAGAGAATGTTTTAGATACCCAT  
CAAAAATTGTATAAAGTGGCTCTAACTTATCCCAATAACCTAACTCTCCGTCGCTATTGTAACCAGTTC  
TAAAAGCTGTATTTGAGTTTATCACCTTGTCACTAAGAAAATAAATGCAGGGTAAAATTTATATCCTT  
CTTGTTTTATGTTTCGGTATAAAACACTAATATCAATTTCTGTGGTTATACTAAAAGTCGTTTTGTTGGT  
CAAATAATGATTAATATCTCTTTTCTTCCAATTGTCTAAATCAATTTTATTAAGTTCATTTGATATG  
CCTCCTAAATTTTTATCTAAAGTGAATTTAGGAGGCTTACTTGTCTGCTTTCTTCAATTAGAATCAATCC  
TTTTTTAAAAGTCAATATTACTGTAACATAAATATATATTTTTAAAATATCCCACTTTATCCAATTTTCGT  
TTGTTGAACTAATGGGTGCTTTAGTTGAAGAATAAAGACCACATTAAAAATGTGGTCTTTTGTGTTTT  
TTTAAAGGATTTGAGCGTAGCGAAAAATCCTTTTCTTTCTTATCTTGATAATAAGGGTAACTATTGCCG  
GGATAGACTGTAACATTCTCACGCATAAAATCCCCTTTCAATTTCTAATGTAAATCTATTACCTTATTAT  
TAATTCATTCGCTCATAATTAATCCTTTTCTTATTACGCAAAATGGCCCGATTTAAGCACACCCTTT  
ATTCCGTTAATGCGCCATGACAGCCATGATAATTACTAATACTAGGAGAAGTTAATAAATACGGGTGA  
TCTAATGATTCAATGATTCAAACCCTTGTGAACCTTTTAGAACAAAAGAGGTTCCGTAACAAGATTTTC  
TTCACACTAGCAATGTTAGTAATTTTTAAAATAGGGACTTATATACCAGCTCCAGGAGTAAATCCTGCA  
GCTTTTGATAATCCCCAAGGTTCTCAAGGTGCCACTGAGTTATTAATACTTTTTGGTGGCGGAGCCTT  
GAAACGATTTTTCTATTTTTGCAATGGGTATTGTACCCTACATCACTGCATCAATCGTAATGCAATTATT  
ACAAATGGATATTGTCCCTAAATTCTCAGAATGGGCAAAAACAAGGTGAAGTAGGTAGAAGAAAAGTTAA  
ATAACGTTACTCGTTATTTAGCAATTTCTTTAGCATTATCCAATCTATAGGTATGGCATTCCAATTTAA  
TAATTATCTCAAAGGTGCGCTGATTATCAATCAGTCAATTATGAGTTATTTATTAATAGCACTAGTTTT  
GACAGCAGGAACTGCTTTCTTAATATGGCTTGGTGATCAAATCACTCAGTTCGGTGTGGTAATGGTA  
TTTCTATTATCATATTTCCCATCAAGCTTATTTAATTATACTCTATCAATGATAGAGTGTCAATATTTTTT  
TTAGTTTTTTCATGAACTCGATCGAGGGGATCCAAATAAAAACTAGTTTGACAAATAACTCTATCAATG  
ATAGAGTGTCAACAAAAGGAGGAATTAATGATGTCTAGATTAGATAAAAGTAAAGTGATTAACAGCG  
CATTAGAGCTGCTTAATGAGGTGCGAATCGAAGGTTAACAACCCGTAACTCGCCAGAAAGCTAGG  
TGTAGAGCAGCCTACATTGTATTGGCATGTAAAAATAAGCGGGCTTTGCTCGACGCCTTAGCCATT  
GAGATGTTAGATAGGCACCATACTCACTTTTGCCCTTTAGAAGGGGAAAGCTGGCAAGATTTTTTACG  
TAATAACGCTAAAAGTTTTAGATGTCTTTACTAAGTCATCGCGATGGAGCAAAAAGTACATTTAGGTA  
CACGGCTACAGAAAACAGTATGAACTCTCGAAAATCAATTAGCCTTTTTATGCCAACAAGGTTTT  
TCACTAGAGAATGCATTATATGCACTCAGCGCTGTGGGGCATTTTACTTTAGGTTGCGTATTGGAAGA  
TCAAGAGCATCAAGTCGCTAAGAAGAAAGGGAAACACCTACTACTGATAGTATGCCGCCATTATTA

CGACAAGCTATCGAATTATTTGATCACCAAGGTGCAGAGCCAGCCTTCTTATTCGGCCTTGAATTGAT  
CATATGCGGATTAGAAAAACAACCTTAAATGTGAAAGTGGGTCTTAAAAGCAGCATAACCTTTTTCCGT  
GATGGTAACTTCACGGTAACCAAGATAACAAAGAATACAAGAAAATATTTACAAAAAATCAATTTAACA  
ATTCCTTAAAACATGCAGGAATTGACGATTTAAACAATATTAGCTTTGAACAATTCTTATCTCTTTTCAA  
TAGCTATAAATTATTTAATAAGTAAGTTAAGGGATGCATAAACTGCATCCCTTAACTTGTTTTTCGTGT  
GCCTATTTTTTGTGAATCGATTATGTCTTTTGCAGCAGTCCGCTTAAACCAGTTTTTCGCTGGTGCGAAA  
AAAGAGTGTCTTGTGACACCTAAATTCAAATCTATCGGTCAGATTTATACCGATTTGATTTTATATAT  
TCTTGAATAACATACGCCGAGTTATCACATAAAAGCGGGAACCAATCATCAAATTTAACTTCATTGC  
ATAATCCATTAACCTCTTAAATTCTACGATTCCCTTGTTTCATCAATAAACTCAATCATTTCTTTAATTAATT  
TATATCTATCTGTTGTTGTTTTCTTTAATAATTCATCAACATCTACACCGCCATAAACTATCATATCTTC  
TTTTTGATATTTAAATTTATTAGGATCGTCCATGTGAAGCATATATCTCACAAAGACCTTTCACACTTCCT  
GCAATCTGCGGAATAGTCGCATTCAATCTTCTGTAATTATTTTTATCTGTTTCATAAGATTTATTACCT  
CATACATCACTAGAATATGATAATGCTCTTTTTTCATCCTATCTTCTGTATCAGTATCCCTATCATGTAA  
TGGAGACACTACAAATGAATGTGTAACCTTTTTAAATACTCTAACCACTCGGCTTTTGCTGATTCTGG  
ATATAAAACAAATGTCCAAATTACGTCTCTTGAATTTTTCTTGTTCAGTTTTCTTTTATTACATTTTTCG  
CTCATGATATAATAACGGTGCTAATACATTTAACAATAATTTAGTCATAGATAGGCAGCATGCCAGTGC  
TGTCTATCTTTTTTTGTTTTAAAATGCACCGTATTCCTCTTTCATATTTTTTTTATTAGAATACCGGTTG  
CATCTGATTTGCTAATATTATATTTTTCTTTGATTCTATTTAATATCTCATTTTTCTTCTGTTGTAAGTCTT  
AAAGTAACAGCAACTTTTTCTCTTCTTTCTATCTACAACCATCACTGTACCTCCCAACATCTGTTTTT  
TTCACTTTAACATAAAAAACAACCTTTTAAACATTA AAAAACC CAATATTTATTTATTTGTTTGGACAATGG  
ACAATGGACACCTAGGGGGGAGGTGCTAGTACCCCTATGTTTTCTCCCCTAAATAACCCCAAAAA  
TCTAAGAAAAAAGACCTCAAAAAGGTCTTTAATTAACATCTCAAATTTGCAATTTATTCCAATTTCTT  
TTTGGCTGTGATGCGCTGCGTCCATTA AAAAT CCTAGAGCTTTGCAACCGAAAGTTAATAGCTGTGCG  
CTACTACTTTGCTTACGCTCTAAGTATATTTAAGGACTGTCACACGCAAAAAGTTTTCTCGGCATAA  
AAGTACCTCTACATCTCTAAATCGTCTGTACGCTGTTTCTACGCTTTCTATCGACCTTCTGGACATTA  
TCCTGTACAACATCCATAAACTGTCCACACGCTCGAATTTGGAATCATTAAAGAATTTCTCTTTAAGC  
CTATTAACCCCTTTCTCAAACCCAGGGAAATTCGCCCTCGCAGCACGATATAAAGTCACTGTACTATC  
TTGAAATTTCTCTGATACATTCAACTGCTCATTCAAACATCATTCTCTCGCTTTAATTTATTAACCTCT  
TTACTTTTTCTGATACCCCTCTTTCCATGTATTCACTACTTCTTTCAAACCTCTCTCTACGTTTTTTTA  
ATTCTTGATTTCTGTGTAATAGTCTGTGCTCTTAATATTTTCGTAATCATCAACAATCCGTTCCCTGCCT  
CGCGCGTTTTCGGTGATGACGGTGAAAACCTCTGACACATGCAGCTCCCGGAGACGGTCCACAGCTTG  
TCTGTAAGCGGATGCCGGGAGCAGACAAGCCCGTCAGGGCGCGTCAGCGGGTGTGGCGGGTGTG  
GGGGCGCAGCCATGACCCAGTCACGTAGCGATAGCGGAGTGTATACTGGCTTAACTATGCGGCATC  
AGAGCAGATTGACTGAGAGTGCACCATATGCGGTGTGAAATACCGCACAGATGCGTAAGGAGAAA  
ATACCGCATCAGGCGCTCTTCCGCTTCTCGCTCACTGACTCGCTGCGCTCGGTGCTTCCGCTGCG  
GCGAGCGGTATCAGCTCACTCAAAGGCGGTAATACGGTTATCCACAGAATCAGGGGATAACGCAGG  
AAAGAACATGTGAGCAAAAAGGCCAGCAAAAAGGCCAGGAACCGTAAAAAGGCCGCGTTGCTGGCGTT  
TTTCCATAGGCTCCGCCCCCTGACGAGCATCAAAAAATCGACGCTCAAGTCAGAGGTGGCGAAA  
CCCGACAGGACTATAAAGATACCAGGCGTTTTCCCTGGAAGCTCCCTCGTGCCTCTCCTGTTCC  
GACCCTGCCGTTACC GGATACCTGTCCGCTTTCTCCCTCGGGAAGCGTGGCGCTTTCTCATAG  
CTCACGCTGTAGGTATCTCAGTTCGTTGAGGTGCTGTTCCGCTCCAAGCTGGGCTGTGTGCACGAACC  
CCCCGTTACGCCGACCGCTGCGCCTTATCCGGTAACTATCGTCTTGAGTCCAACCCGTAAGACA  
CGACTTATCGCCACTGGCAGCAGCCACTGGTAACAGGATTAGCAGAGCGAGGTATGTAGGCGGTG  
TACAGAGTTCTTGAAGTGGTGGCCTAACTACGGCTACACTAGAAGGACAGTATTTGGTATCTGCGCT  
CTGCTGAAGCCAGTTACCTTCGGAAAAAGAGTTGGTAGCTCTTGATCCGGCAAAACAACCACCGCTG  
GTAGCGGTGGTTTTTTTTGTTTGAAGCAGCAGATTACGCGCAGAAAAAAGGATCTCAAGAAGATCC  
TTTGATCTTTTCTACGGGGTCTGACGCTCAGTGGAAACGAAAACCTCACGTTAAGGGATTTTGGTCATGA  
GATTATCAAAAAGGATCTTACCTAGATCCTTTTAAATTA AAAAATGAAGTTTTAAATCAATCTAAAGTAT  
ATATGAGTAACTTGGTCTGACAGTTACCAATGCTTAATCAGTGAGGCACCTATCTCAGCGATCTGTC  
TATTTGTTTCATCCATAGTTGCCTGACTCCCCGTCGTGTAGATAACTACGATACGGGAGGGCTTACC  
ATCTGGCCCCAGTGCTGCAATGATACCGCGAGACCCACGCTCACCGGCTCCAGATTTATCAGCAATA  
AACCAGCCAGCCGGAAGGGCCGAGCGCAGAAGTGGTCTGCAACTTTATCCGCCTCCATCCAGTCT  
ATTAATTGTTGCCGGGAAGCTAGAGTAAGTAGTTCCGCAAGTTAATAGTTTGCGCAACGTTGTTGCCAT  
TGCTGCAGGCATCGTGGTGCACGCTCGTCTGTTGGTATGGCTTCATTCAGCTCCGGTTCCCAACGA  
TCAAGGCGAGTTACATGATCCCCATGTTGTGCAAAAAAGCGGTTAGCTCCTTCGGTCTCCGATCG  
TTGTCAGAAGTAAGTTGGCCGAGTGTATCACTCATGGTTATGGCAGCACTGCATAATTCTTACT

GTCATGCCATCCGTAAGATGCTTTTCTGTGACTGGTGAGTACTCAACCAAGTCATTCTGAGAATAGTG  
TATGCGGCGACCGAGTTGCTCTTGCCCGGCGTCAACACGGGATAATACCGCGCCACATAGCAGAAC  
TTTAAAAGTGCTCATCATTGAAAACGTTCTTCGGGGCGAAAACCTCAAGGATCTTACCGCTGTTGA  
GATCCAGTTGATGTAACCCACTCGTGCACCCAACCTGATCTTCAGCATCTTTTACTTTACCAGCGTT  
TCTGGGTGAGCAAAAACAGGAAGGCAAAATGCCGCAAAAAGGGAATAAGGGCGACACGGAAATGT  
TGAATACTCATACTCTTCCTTTTTCAATATTATTGAAGCATTATCAGGGTTATTGTCTCATGAGCGGA  
TACATATTTGAATGTATTTAGAAAAATAAACAAATAGGGGTTCGCGCACATTTCCCCGAAAAGTGCC  
ACCTGACGTCTAAGAAACCATTATTA

**Table S6. Fitness studies of the *geh* locus.\***

| <b>Strain one genotype</b>      | <b>Strain two genotype</b>                      | <b>CFU<sup>§</sup> total</b> | <b>CFU erm</b> | <b>ratio</b> |
|---------------------------------|-------------------------------------------------|------------------------------|----------------|--------------|
| Wild type                       | <i>geh::Tn (ermB)</i>                           | 2853 ±44                     | 1389 ± 73      | 0.49 ± 0.03  |
| Wild type                       | <i>geh::pLL39 lacB::Tn (ermB)</i>               | 1957 ± 102                   | 906 ± 7        | 0.46 ± 0.03  |
| <i>geh::pLL39</i>               | <i>lacB::Tn(ermB)</i>                           | 1083 ±502                    | 530 ± 230      | 0.49 ± 0.03  |
| <i>geh::srrAp_sarA_RBS_lacZ</i> | <i>lacB::Tn (ermB)</i>                          | 1335 ±267                    | 649 ± 153      | 0.49 ± 0.02  |
| Wild type                       | <i>geh::srrAp_sarA_RBS_lacZ lacB::Tn (ermB)</i> | 1848 ± 271                   | 879 ± 131      | 0.48 ± 0.10  |

\*Bacterial co-cultures were serially diluted in PBS by a factor of  $1 \times 10^{-6}$  and 100  $\mu$ l of each dilution was spread on TSB agar plates supplemented with or without 10  $\mu$ g ml<sup>-1</sup> Erm. The data represent the average CFU for three independent experiments and standard deviations are shown.

<sup>§</sup> abbreviations: Tn, transposon; erm, erythromycin; CFU, colony forming units.

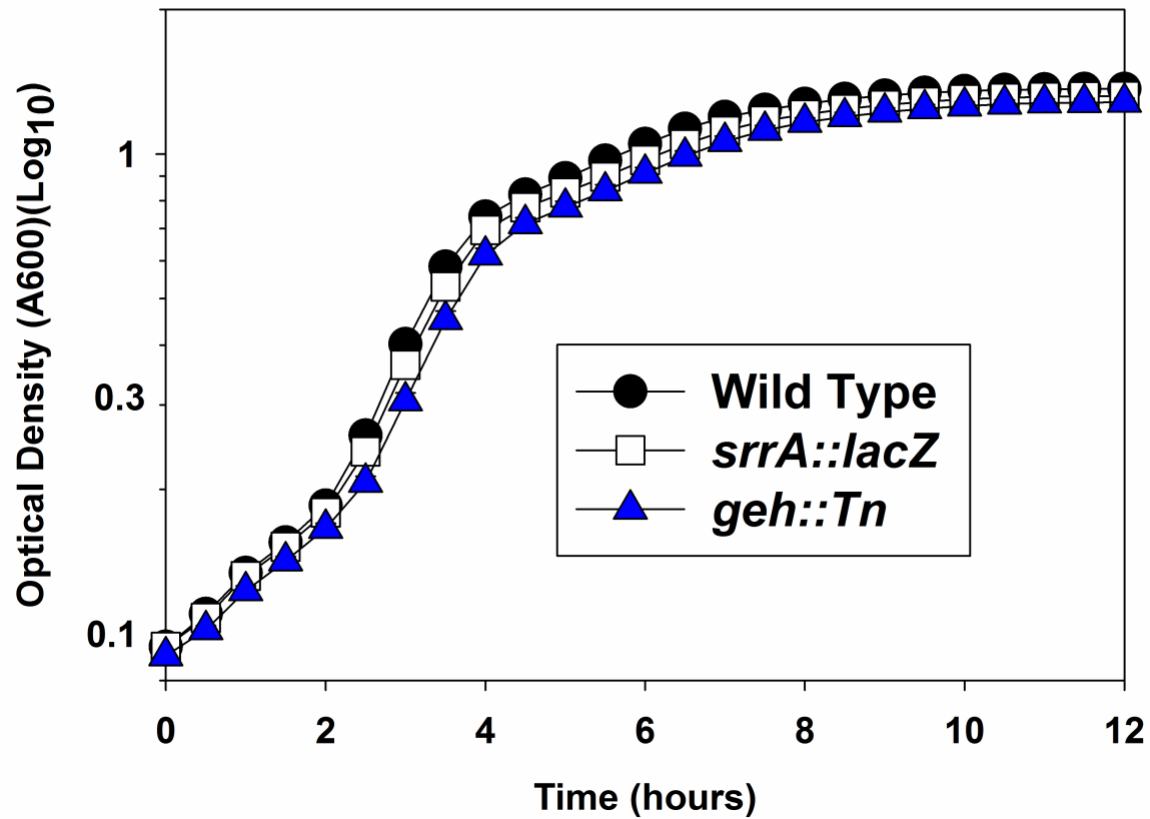

**Figure S1.** Growth of the wild type (JMB1100), *geh::srrAp\_sarA\_RBS\_lacZ* (JMB 9742), and *geh::Tn* (10622) strains in 0.5X TSB media. The data displayed are the average of biological triplicates. Standard deviations are shown but in most cases are smaller than the symbols.
